# Supplementary material for: Changes and specificities in health behaviors among healthcare students over an 8-year period
Source: PLoS One. 2018 Mar 22;13(3):e0194188. doi: 10.1371/journal.pone.0194188 (PMC5863977; doi:10.1371/journal.pone.0194188)
Supplement: S3 File — (XLSX) [file pone.0194188.s003.xlsx]

## Sheet: DB CS1 et 2
Study	AGE	Gender 1:H 2:F	BMI 3 categories	3 BMI	MARITAL 1 alone 2 couple	LOGEMENT 1parents 2location 3 university	Filiere	Filiere 4 classes	Years of study	Years 4 categories	Job 0No 1Yes	Grant 0No 1Yes	Tobacco 0No 1Yes	Number cigarette	Frequence OH	Quantite OH 0:<5/j 1: 5 ou plus /j	Binge Drinking	Cannabis	score COHEN	SPORT 0No 1Yes	FREQ_SPORT/week	duration SPORT 1<30mn 2:30-60mn 3>60mn	SCOFF 0No 1Yes	Perceived health 1very good 2 mostly good 3 bad	Lifetime Psychotropics	Composite risk 0 to 4	Tobacco 0No 1Yes	heavy drink 0No 1Yes	SPORT 0No 1Yes	overweight-obesity 0:no 1:yes
CS1	18	2	normal	normal	1	2	1	Med	2	2	0	0	0		Occasional	0	Occasional	No	3	1	2	3	0	1	0	0	0	0	0	0
CS1	18	2	normal	normal	1	2	1	Med	2	2	0	0	0		Occasional	0	Occasional	Occasional	9	1	2	2	1	2	0	0	0	0	0	0
CS1	19	2	underweight	maigreur	2	1	1	Med	2	2	1	0	0		Occasional	0	Never	No	17	1	2	3	0	2	1	0	0	0	0	0
CS1	19	2	normal	normal	1	2	1	Med	2	2	0	0	0		Occasional	0	Never	No	18	1	1	2	0	1	0	0	0	0	0	0
CS1	19	1	normal	normal	1	1	1	Med	2	2	0	0	0		Occasional	0	Never	No	9	1	1	3	0	2	0	0	0	0	0	0
CS1	19	2	underweight	maigreur	1	1	1	Med	2	2	0	0	0		Occasional	0	Never	No	9	1	1	3	0	2	0	0	0	0	0	0
CS1	19	2	normal	normal	2	2	1	Med	2	2	0	0	0		Occasional	0	Never	Occasional	11	1	1	2	0	1	1	0	0	0	0	0
CS1	19	2	underweight	maigreur		2	1	Med	2	2	0	0	0		Occasional	0	Occasional	No	16	1	1	2	0	2	0	0	0	0	0	0
CS1	19	2	normal	normal	2	2	1	Med	2	2	0	0	0		Occasional	0	Occasional	No		1	1	1	1	2	1	0	0	0	0	0
CS1	19	2	normal	normal	1	2	1	Med	2	2	0	0	0		Occasional	0	Occasional	No		1	1	2	0	1	0	0	0	0	0	0
CS1	19	2	normal	normal	1	1	1	Med	2	2	1	0	0		Occasional	0	Occasional	No	12	1	2	3		2		0	0	0	0	0
CS1	19	2	normal	normal	1	3	1	Med	2	2	1	1	0		Occasional	0	Occasional	No	10	1	2	3	0	1	1	0	0	0	0	0
CS1	19	2	normal	normal	1	1	1	Med	2	2	1	0	0		Occasional	0	Occasional	No	10	1	>3	1	0	2	0	0	0	0	0	0
CS1	19	2	normal	normal	1	1	1	Med	2	2	0	0	0		Occasional	0	Occasional	Occasional	11	1	>3	2	1	2	0	0	0	0	0	0
CS1	19	2	underweight	maigreur	1	1	1	Med	2	2	0	0	0		Occasional	1	Occasional	No	13	1	1	3	0	2	0	0	0	0	0	0
CS1	19	1	normal	normal	1	2	1	Med	2	2	0	0	0		Occasional	1	Occasional	No	9	1	1	3	0	1	0	0	0	0	0	0
CS1	19	2	normal	normal	1	2	1	Med	2	2	0	1	0		Occasional	1	Occasional	No	15	1	3	3	1	1	1	0	0	0	0	0
CS1	19	2	normal	normal	1	2	1	Med	3	3	0	0	1		Occasional	0	Occasional	Occasional	7	1	1	3	0	2	1	1	1	0	0	0
CS1	19	1	normal	normal	2	1	1	Med	2	2	0	0	1	4	Occasional	1	Occasional	Occasional	10	1	1	3	1	2	0	1	1	0	0	0
CS1	19	2	normal	normal	2	1	1	Med	2	2	0	0	0		Frequent	0	Occasional	No	8	1	2	1	0	2	0	1	0	1	0	0
CS1	19	1	normal	normal	1	1	1	Med	2	2	1	0	0		Frequent	1	Frequent	Occasional	9	1	2	3	1	2	0	1	0	1	0	0
CS1	19	2	normal	normal	1	1	1	Med	2	2	0	0	0		Frequent	1	Frequent	Regular	4	1	2	2	0	2	0	1	0	1	0	0	faible
CS1	19	1	overweight	overweight	1	2	1	Med	3	3	0	0	0		Frequent	1	Frequent	No	17	1	1	1	1	2	1	2	0	1	0	1
CS1	19	2	normal	normal	1	2	1	Med	2	2	0	0	1	4	Frequent	1	Frequent	Occasional	1	1	2	3	1	2	0	2	1	1	0	0
CS1	19	2	normal	normal	1	2	1	Med	2	2	0	0	1	10	Frequent	1	Frequent	Occasional		1	>3	1	0	1	0	2	1	1	0	0
CS1	19	2	normal	normal	1	2	1	Med	2	2	0	1	0		Never	0	Never	No	30	1	2	2	1	3	1	0	0	0	0	0
CS1	19	2	normal	normal	1	1	1	Med	2	2	0	1	0		Never	0	Never	No	20	1	3	3	0	2	1	0	0	0	0	0
CS1	20	2	normal	normal	1	1	1	Med	3	3	0	0	0		Occasional	0	Never	No	6	1	1	2	0	1	0	0	0	0	0	0
CS1	20	2	normal	normal	1	2	1	Med	3	3	0	0	0		Occasional	0	Never	No	11	1	1	2	0	2	0	0	0	0	0	0
CS1	20	2	normal	normal	2	2	1	Med	2	2	0	0	0		Occasional	0	Never	No	14	1	3	3	0	2	0	0	0	0	0	0
CS1	20	1	normal	normal	1	3	1	Med	2	2	0	0	0		Occasional	0	Never	Regular	21	1	3	1	0	2	0	0	0	0	0	0
CS1	20	1	normal	normal	1	2	1	Med	2	2	0	1	0		Occasional	1	Frequent	No	17	1	3	1	0	2	0	1	0	1	0	0
CS1	20	2	normal	normal	2	2	1	Med	2	2	0	0	1	7	Frequent	0	Frequent	Occasional	6	1	1	2	0	2	0	2	1	1	0	0
CS1	20	2	underweight	maigreur	2	2	1	Med	2	2	0	0	0		Occasional	0	Never	No	18	1	1	3	0	2	1	0	0	0	0	0
CS1	20	2	normal	normal	2	2	1	Med	2	2	0	0	0		Occasional	0	Never	No	13	1	1	3	1	2	1	0	0	0	0	0
CS1	20	1	normal	normal	2	1	1	Med	2	2	0	0	0		Occasional	0	Never	No	23	1	1	2	1	1	1	0	0	0	0	0
CS1	20	2	normal	normal	2	1	1	Med	2	2	0	0	0		Occasional	0	Never	No	21	1	1	3	0	2	0	0	0	0	0	0
CS1	20	1	normal	normal	2	2	1	Med	2	2	0	0	0		Occasional	0	Never	No	16	1	2	3	0	2	0	0	0	0	0	0
CS1	20	2	normal	normal	1	2	1	Med	2	2	0	0	0		Occasional	0	Never	No	11	1	2	3	0	2	0	0	0	0	0	0
CS1	20	1	normal	normal	1	2	1	Med	2	2	0	1	0		Occasional	0	Never	No	9	1	2	3	0	2	0	0	0	0	0	0
CS1	20	2	normal	normal	2	1	1	Med	2	2	0	0	0		Occasional	0	Never	No	15	1	2	2	0	2	0	0	0	0	0	0
CS1	20	2	normal	normal	1	1	1	Med	3	3	0	0	0		Occasional	0	Never	No	20	1	2	3	0	2	0	0	0	0	0	0
CS1	20	2			1	2	1	Med	2	2	0	0	0		Occasional	0	Never	No	14	1	>3	3	0	2	0	0	0	0	0
CS1	20	2	underweight	maigreur	1	3	1	Med	2	2	1	0	0		Occasional	0	Occasional	No	24	1	>3	3	1	3	1	0	0	0	0	0
CS1	20	1	normal	normal	1	3	1	Med	2	2	1	0	0		Occasional	0	Occasional	No	21	1	1	2		2		0	0	0	0	0
CS1	20	2	normal	normal	1	2	1	Med	2	2	0	0	0		Occasional	0	Occasional	No	15	1	1	3	0	2	1	0	0	0	0	0
CS1	20	2	normal	normal	2	2	1	Med	3	3	1	0	0		Occasional	0	Occasional	No	20	1	1	2	0	2	1	0	0	0	0	0
CS1	20	2	normal	normal	1	1	1	Med	3	3	0	0	0		Occasional	0	Occasional	No	29	1	1	2	1	2	0	0	0	0	0	0
CS1	20	1	normal	normal	1	2	1	Med	2	2	0	0	0		Occasional	0	Occasional	No	11	1	2	3	0	2	0	0	0	0	0	0
CS1	20	2	normal	normal	1	1	1	Med	2	2	0	0	0		Occasional	0	Occasional	No	15	1	2	3	0	1	0	0	0	0	0	0
CS1	20	2	normal	normal	2	1	1	Med	2	2	0	0	0		Occasional	0	Occasional	No	2	1	2	2	0	2	0	0	0	0	0	0
CS1	20	2	normal	normal	2	2	1	Med	2	2	1	1	0		Occasional	0	Occasional	No	18	1	2	3	1	3	0	0	0	0	0	0
CS1	20	2	normal	normal	1	1	1	Med	2	2	0	0	0		Occasional	0	Occasional	No	15	1	2	3	1	2	1	0	0	0	0	0
CS1	20	1	normal	normal	1	2	1	Med	2	2	0	0	0		Occasional	0	Occasional	No	7	1	3	2	1	2	0	0	0	0	0	0
CS1	20	2	normal	normal	2	2	1	Med	3	3	1	0	0		Occasional	0	Occasional	No	15	1	3	2	0	2	1	0	0	0	0	0
CS1	20	2	normal	normal	1	1	1	Med	2	2	0	0	0		Occasional	0	Occasional	No	25	1	>3	3	1	2	1	0	0	0	0	0
CS1	20	2	normal	normal	1	2	1	Med	2	2	0	0	0		Occasional	0	Occasional	Occasional	5	1	1	3	1	1	0	0	0	0	0	0
CS1	20	2	normal	normal	2	2	1	Med	2	2	0	0	0		Occasional	1	Never	No	12	1	2	3	1	2	1	0	0	0	0	0
CS1	20	2	normal	normal	1	2	1	Med	2	2	1	0	0		Occasional	1	Never	Occasional	22	1	1	3	0	2	1	0	0	0	0	0
CS1	20	2	normal	normal	1	1	1	Med	4	>3	1	0	0		Occasional	1	Occasional	No	3	1	1	3	0	1	1	0	0	0	0	0
CS1	20	2	normal	normal	1	2	1	Med	2	2	0	0	0		Occasional	1	Occasional	No	5	1	2	2	0	2	0	0	0	0	0	0
CS1	20	1	normal	normal	1	2	1	Med	2	2	1	0	0		Occasional	1	Occasional	No	10	1	2	1	0	2	1	0	0	0	0	0
CS1	20	2	normal	normal	1	1	1	Med	3	3	0	1	0		Occasional	1	Occasional	Occasional	14	1	>3	3	1	1	0	0	0	0	0	0
CS1	20	2	overweight	overweight	1	1	1	Med	3	3	1	0	0		Occasional	0	Never	No	21	1	1	2	0	2	0	1	0	0	0	1
CS1	20	2	overweight	overweight	1	3	1	Med	2	2	0	0	0		Occasional	0	Never	No	12	1	2	2	0	2	0	1	0	0	0	1
CS1	20	2	normal	normal	2	1	1	Med	2	2	1	0	1	2	Occasional	0	Occasional	No	6	1	1	3	0	2	0	1	1	0	0	0
CS1	20	2	normal	normal	1	2	1	Med	2	2	0	0	0		Occasional	1	Frequent	No	7	1	2	3	0	1	0	1	0	1	0	0
CS1	20	2	normal	normal	1	1	1	Med	2	2	0	0	0		Occasional		Frequent	No	13	1	2	1	0	2	0	1	0	1	0	0
CS1	20	1	normal	normal	1	2	1	Med	2	2	0	0	0		Frequent	0	Frequent	Occasional	5	1	>3	3	0	2	0	1	0	1	0	0
CS1	20	2	underweight	maigreur	1	2	1	Med	2	2	0	0	0		Frequent	0	Occasional	No	24	1	>3	3	1	2	1	1	0	1	0	0
CS1	20	2	normal	normal	1	2	1	Med	3	3	0	0	0		Frequent	1	Frequent	No	20	1	3	2		2	1	1	0	1	0	0
CS1	20	2	normal	normal	1	1	1	Med	2	2	1	0	0		Frequent	1	Frequent	Occasional	12	1	1	3	1	2	0	1	0	1	0	0
CS1	20	1	normal	normal	1	1	1	Med	2	2	0	0	0		Frequent	1	Frequent	Regular	4	1	2	3	0	2	0	1	0	1	0	0	eleve
CS1	20	2	normal	normal	1	1	1	Med	2	2	0	0	1	10	Occasional	1	Frequent	No	14	1	1	3	0	3	0	2	1	1	0	0
CS1	20	1	normal	normal	1	1	1	Med	2	2	0	0	1	7	Frequent	1	Frequent	Regular	12	1	3	3	0	1	0	2	1	1	0	0
CS1	20	1				1	1	Med	2	2	1	0	1	25	Frequent	1	Frequent	Regular	17	1	3	3	0	2	1	2	1	1	0
CS1	20	2	normal	normal	1	1	1	Med	2	2	1	1	0		Never	0	Never	No	9	1	3	2	0	2	0	0	0	0	0	0
CS1	20	1	normal	normal	2	1	1	Med	2	2	1	0	0		Never	0	Never	No	14	1	>3	2	1	2	0	0	0	0	0	0
CS1	20	2	normal	normal	1	2	1	Med	2	2	1	1	0		Occasional	0	Never	No	20	1	1	3	0	2	0	0	0	0	0	0
CS1	20	1	normal	normal	1	1	1	Med	2	2	0	0	0		Occasional	1	Occasional			1	3	2		2	0	0	0	0	0	0
CS1	20	2	normal	normal	1	1	1	Med	2	2	0	0	1	6	Frequent	1	Occasional			1	1	2	0	2	0	2	1	1	0	0
CS1	20	1	normal	normal	2	2	1	Med	3	3	0	0	0		Frequent	1	Occasional	No	15	1	1	3	0	1		1	0	1	0	0
CS1	20	1	normal	normal	1	2	1	Med	2	2	0	0	0		Frequent		Frequent			1	3	2	0	2	0	1	0	1	0	0
CS1	21	2	normal	normal	1	3	1	Med	4	>3	0	0	0		Occasional	0	Never	No	7	1	1	3	0	1	0	0	0	0	0	0
CS1	21	2	normal	normal	1	2	1	Med	3	3	0	1	0		Occasional	0	Never	No	19	1	1	3	0	2	1	0	0	0	0	0
CS1	21	1	normal	normal	1	3	1	Med	4	>3	1	0	0		Occasional	0	Never	No	8	1	3	3	0	1	0	0	0	0	0	0
CS1	21	1	normal	normal	1	2	1	Med	4	>3	0	0	0		Occasional	0	Occasional	Occasional	15	1	2	3	0	2	0	0	0	0	0	0
CS1	21	2	underweight	maigreur	1	2	1	Med	3	3	0	0	0		Occasional	0	Never	No	6	1	1	3	0	2	0	0	0	0	0	0
CS1	21	2	normal	normal	2	3	1	Med	4	>3	0	0	0		Occasional	0	Never	No	11	1	1	2	0	2	0	0	0	0	0	0
CS1	21	2	normal	normal	1	2	1	Med	2	2	0	0	0		Occasional	0	Never	No	14	1	1	2	0	2	0	0	0	0	0	0
CS1	21	2	normal	normal	2	1	1	Med	2	2	0	0	0		Occasional	0	Never	No	8	1	1	2	0	1	0	0	0	0	0	0
CS1	21	2	normal	normal	2	1	1	Med	4	>3	0	0	0		Occasional	0	Never	No		1	2	2	0	1	0	0	0	0	0	0
CS1	21	2	normal	normal	1	1	1	Med	3	3	0	0	0		Occasional	0	Never	No	13	1	3	3	0	2	0	0	0	0	0	0
CS1	21	2	normal	normal	1	1	1	Med	3	3	1	0	0		Occasional	0	Never	No	20	1	>3	1	1	2		0	0	0	0	0
CS1	21	2	underweight	maigreur	2	1	1	Med	4	>3	0	0	0		Occasional	0	Never	Occasional	11	1	1	2	0	2	0	0	0	0	0	0
CS1	21	2	underweight	maigreur	1	2	1	Med	3	3	0	0	0		Occasional	0	Occasional	No	10	1	1	2	0	2	1	0	0	0	0	0
CS1	21	2	underweight	maigreur	1	2	1	Med	3	3	0	0	0		Occasional	0	Occasional	No	22	1	1	2	0	2	0	0	0	0	0	0
CS1	21	2	normal	normal	2	2	1	Med	4	>3	0	0	0		Occasional	0	Occasional	No	13	1	1	2	0	2	0	0	0	0	0	0
CS1	21	1	normal	normal	1	2	1	Med	3	3	1	0	0		Occasional	0	Occasional	No	18	1	1	3	1	1	0	0	0	0	0	0
CS1	21	2	normal	normal	2	2	1	Med	3	3	0	0	0		Occasional	0	Occasional	No	19	1	1	1	0	2	1	0	0	0	0	0
CS1	21	2	normal	normal	1	2	1	Med	3	3	0	1	0		Occasional	0	Occasional	No	19	1	1	2	0	1	0	0	0	0	0	0
CS1	21	2	normal	normal	1	2	1	Med	4	>3	0	0	0		Occasional	0	Occasional	No	29	1	2	1	0	2	0	0	0	0	0	0
CS1	21	1	normal	normal	2	2	1	Med	2	2	0	0	0		Occasional	0	Occasional	No	4	1	2	2	0	2	0	0	0	0	0	0
CS1	21	2	normal	normal	1	2	1	Med	2	2	1	0	0		Occasional	0	Occasional	No	21	1	2	2	1	2	0	0	0	0	0	0
CS1	21	2	normal	normal	1	2	1	Med	2	2	0	0	0		Occasional	0	Occasional	No	14	1	3	2	0	2	1	0	0	0	0	0
CS1	21	1	normal	normal	2	1	1	Med	2	2	1	0	0		Occasional	0	Occasional	No		1	3	3	0	2	0	0	0	0	0	0
CS1	21	2	normal	normal	1	2	1	Med	4	>3	0	0	0		Occasional	0	Occasional	No	24	1	>3	3	1	2	0	0	0	0	0	0
CS1	21	1	normal	normal	1	2	1	Med	2	2	0	0	0		Occasional	0	Occasional	No	3	1	>3	2	0	2	0	0	0	0	0	0
CS1	21	2			1	2	1	Med	3	3	0	0	0		Occasional	0	Occasional	No	19	1	1	2	0	3	1	0	0	0	0
CS1	21	2	normal	normal	2	2	1	Med	4	>3	0	0	0		Occasional	0	Occasional	Occasional	6	1	2	3	0	2	0	0	0	0	0	0
CS1	21	1	normal	normal	2	2	1	Med	3	3	0	0	0		Occasional	1	Occasional	No	9	1	1	2	0	2	0	0	0	0	0	0
CS1	21	1	normal	normal	1	2	1	Med	3	3	0	0	0		Occasional	1	Occasional	No	11	1	2	2	1	2	0	0	0	0	0	0
CS1	21	1	normal	normal	1	1	1	Med	3	3	0	0	0		Occasional	1	Occasional	No	7	1	3	3	1	2	0	0	0	0	0	0
CS1	21	2	normal	normal	1	2	1	Med	3	3	1	1	0		Occasional	1	Occasional	No	9	1	3	2	0	1	0	0	0	0	0	0
CS1	21	1	normal	normal	2	1	1	Med	3	3	1	0	0		Occasional	1	Occasional	No	0	1	>3	3	0	1	1	0	0	0	0	0
CS1	21	2	normal	normal	1	1	1	Med	2	2	1	0	0		Occasional	1	Occasional	Occasional	7	1	1	1	0	2	0	0	0	0	0	0
CS1	21	1	normal	normal	1	1	1	Med	3	3	0	0	0		Occasional	1	Occasional	Occasional	16	1	3	3	1	2	1	0	0	0	0	0
CS1	21	2	obesity	overweight	2	1	1	Med	3	3	1	1	0		Occasional	0	Never	No	12	1	2	3	0	2	1	1	0	0	0	1
CS1	21	1	obesity	overweight	2	1	1	Med	2	2	0	0	0		Occasional	0	Occasional	No	2	1	1	2	0	2	1	1	0	0	0	1
CS1	21	2	normal	normal	2	2	1	Med	4	>3	1	0	1	2	Occasional	0	Occasional	Occasional	19	1	2	2	1	2	0	1	1	0	0	0
CS1	21	2	overweight	overweight	1	2	1	Med	5	>3	0	1	0		Occasional	1	Occasional	No	4	1	>3	1	0	1	0	1	0	0	0	1
CS1	21	1	overweight	overweight	2	2	1	Med	3	3	1	0	0		Occasional	1	Occasional	Occasional	7	1	1	2	0	2	0	1	0	0	0	1
CS1	21	1	normal	normal	2	1	1	Med	4	>3	1	0	1	2	Occasional	1	Occasional	Occasional	23	1	1	2	1	1	1	1	1	0	0	0
CS1	21	2	normal	normal	1	2	1	Med	4	>3	0	0	1	3	Occasional	1	Occasional	Occasional	12	1	3	1	0	2	1	1	1	0	0	0
CS1	21	2	normal	normal	1	1	1	Med	4	>3	0	0	1	5	Occasional	1	Occasional	Regular	6	1	>3	2	0	2	0	1	1	0	0	0
CS1	21	2	normal	normal	1	2	1	Med	2	2	0	0	0		Frequent	0	Frequent		8	1	>3	2	0	1	1	1	0	1	0	0
CS1	21	2	underweight	maigreur	1	1	1	Med	2	2	0	0	0		Frequent	0	Occasional	No	13	1	3	3	0	2	1	1	0	1	0	0
CS1	21	2	normal	normal	1	2	1	Med	3	3	1	0	0		Frequent	0	Occasional	No	17	1	1	2	0	2	0	1	0	1	0	0
CS1	21	2	normal	normal	2	2	1	Med	3	3	1	0	0		Frequent	0	Occasional	No	14	1	2	2	0	1	1	1	0	1	0	0
CS1	21	2	normal	normal	1	2	1	Med	3	3	0	1	0		Frequent	0	Occasional	Occasional	28	1	1	2	0	2	0	1	0	1	0	0
CS1	21	1	normal	normal	1	2	1	Med	4	>3	1	0	0		Frequent	1	Frequent	No	1	1	3	3	0	1	0	1	0	1	0	0
CS1	21	2	normal	normal	2	2	1	Med	2	2	1	1	0		Frequent	1	Frequent	Occasional	22	1	3	2	1	2	0	1	0	1	0	0
CS1	21	1	normal	normal	2	2	1	Med	2	2	0	0	0		Frequent	1	Occasional	No	10	1	>3	2	0	2	0	1	0	1	0	0
CS1	21	1	overweight	overweight	2	3	1	Med	3	3	1	1	1	10	Occasional	1	Occasional	Regular	8	1	1	3	0	3	0	2	1	0	0	1
CS1	21	1	overweight	overweight	1	2	1	Med	3	3	0	0	0	2	Frequent	0	Never	No	3	1	>3	3	0	2	0	2	0	1	0	1
CS1	21	1	overweight	overweight	1	2	1	Med	3	3	0	0	0		Frequent	1	Frequent	No	8	1	2	3	0	2	0	2	0	1	0	1
CS1	21	1	normal	normal	2	2	1	Med	2	2	0	0	1	6	Frequent	1	Frequent	Regular	4	1	3	3	0	1	0	2	1	1	0	0
CS1	21	1	normal	normal	1	2	1	Med	3	3	0	0	1	10	Frequent	1	Occasional	Occasional	11	1	1	2	0	2	0	2	1	1	0	0
CS1	21	1	overweight	overweight	2	2	1	Med	2	2	1	0	1	20	Frequent	1	Frequent	Occasional	15	1	3	3	0	2	0	3	1	1	0	1
CS1	21	1	overweight	overweight	1	2	1	Med	4	>3	0	0	1	10	Frequent	1	Occasional	No	5	1	2	1	0	2	0	3	1	1	0	1
CS1	21	2	normal	normal	1	3	1	Med	2	2	0	0	0		Never	0	Never	No	17	1	1	2	0	2	1	0	0	0	0	0
CS1	21	2	normal	normal	1	2	1	Med	3	3	0	1	0		Never	0	Never	No	16	1	1	1		2	0	0	0	0	0	0
CS1	21	2	normal	normal	2	2	1	Med	2	2	0	1	0		Never	0	Never	No	1	1	2	3	1	2	0	0	0	0	0	0
CS1	21	2	normal	normal	2	2	1	Med	2	2	0	0	0	1	Never	0	Never	No	5	1	>3	3	0	2	0	0	0	0	0	0
CS1	21	1	normal	normal	2	2	1	Med	4	>3	0	0	0		Never	0	Never	Regular	5	1	2	3	1	1	0	0	0	0	0	0
CS1	21	2	normal	normal	2	2	1	Med	2	2	0	1	1	10	Never	0	Never	Occasional	17	1	1	2	0	2	1	1	1	0	0	0
CS1	21	2	normal	normal	2	2	1	Med	4	>3	0		0		Frequent	0	Never			1	1	1				1	0	1	0	0
CS1	22	2	normal	normal	1	2	1	Med	5	>3	1	1	0		Occasional	0	Never	No	14	1	2	2	0	2	0	0	0	0	0	0
CS1	22	2	normal	normal	1	2	1	Med	5	>3	0	0	0		Occasional	0	Never	No	14	1	2	2	0	2	0	0	0	0	0	0
CS1	22	2	normal	normal	2	2	1	Med	3	3	1	0	0		Occasional	0	Never	No	9	1	2	2	0		0	0	0	0	0	0
CS1	22	1	normal	normal	2	2	1	Med	4	>3	0	0	0		Occasional	0	Never	Occasional	4	1	1	2	0	2	0	0	0	0	0	0
CS1	22	1	normal	normal	2	2	1	Med	4	>3	0	0	0		Occasional	0	Occasional	Occasional	10	1	1	3	0	2	0	0	0	0	0	0
CS1	22	1	overweight	overweight	1	2	1	Med	4	>3	0	1	0		Occasional	0	Never	No	7	1	3	3		1	0	1	0	0	0	1
CS1	22	1	normal	normal	1	3	1	Med	4	>3	1	1	0		Frequent	0	Occasional	Occasional	11	1	2	1	0	1	0	1	0	1	0	0
CS1	22	2	underweight	maigreur	1	2	1	Med	4	>3	0	0	0		Occasional	0	Never	No	8	1	1	2	0	1	1	0	0	0	0	0
CS1	22	2	underweight	maigreur	2	1	1	Med	3	3	1	0	0		Occasional	0	Never	No	18	1	1	3	0	2	0	0	0	0	0	0
CS1	22	2	normal	normal	1	2	1	Med	5	>3	0	0	0		Occasional	0	Never	No	11	1	1	2	0	2	0	0	0	0	0	0
CS1	22	2	normal	normal	1	2	1	Med	4	>3	0	0	0		Occasional	0	Never	No	12	1	1	3	0	2	1	0	0	0	0	0
CS1	22	2	normal	normal	2	2	1	Med	4	>3	0	0	0		Occasional	0	Never	No	11	1	1	3	0	1	0	0	0	0	0	0
CS1	22	2	normal	normal	2	2	1	Med	4	>3	0	1	0		Occasional	0	Never	No	14	1	1	3	0	2	1	0	0	0	0	0
CS1	22	2	normal	normal	1	2	1	Med	4	>3	1	1	0		Occasional	0	Never	No	13	1	1	2	0	2	0	0	0	0	0	0
CS1	22	2	normal	normal	1	1	1	Med	3	3	0	0	0		Occasional	0	Never	No	15	1	1	2	0	1	0	0	0	0	0	0
CS1	22	1	normal	normal	2	2	1	Med	4	>3	0	0	0		Occasional	0	Never	No	12	1	2	2	1	2	1	0	0	0	0	0
CS1	22	2	normal	normal	2	2	1	Med	5	>3	0	0	0		Occasional	0	Never	No	2	1	3	3	0	1	0	0	0	0	0	0
CS1	22	2	normal	normal	2	2	1	Med	4	>3	0	0	0		Occasional	0	Never	No	8	1	3	2	0	1	0	0	0	0	0	0
CS1	22	1	normal	normal	1	1	1	Med	4	>3	0	0	0		Occasional	0	Never	No	13	1	3	2	0	2	1	0	0	0	0	0
CS1	22	2	normal	normal	2	2	1	Med	3	3	0	0	0		Occasional	0	Never	No	9	1	>3	3	0	1	0	0	0	0	0	0
CS1	22	2	normal	normal	1	1	1	Med	4	>3	0	0	0		Occasional	0	Never	No	17	1	1	1	1	2	1	0	0	0	0	0
CS1	22	2	normal	normal	2	2	1	Med	5	>3	0	0	0		Occasional	0	Occasional	No	3	1	1	2	0	1	0	0	0	0	0	0
CS1	22	2	normal	normal	1	2	1	Med	5	>3	0	0	0		Occasional	0	Occasional	No	14	1	1	3	0	2	0	0	0	0	0	0
CS1	22	2	normal	normal	1	2	1	Med	4	>3	0	0	0		Occasional	0	Occasional	No	9	1	1	2	0	1	0	0	0	0	0	0
CS1	22	2	normal	normal	2	2	1	Med	5	>3	0	0	0		Occasional	0	Occasional	No	11	1	1	3	0	2	1	0	0	0	0	0
CS1	22	2	normal	normal	1	1	1	Med	3	3	0	0	0		Occasional	0	Occasional	No	27	1	1	3	1	2	0	0	0	0	0	0
CS1	22	2	normal	normal	2	1	1	Med	3	3	0	0	0		Occasional	0	Occasional	No		1	1	2	0	1	0	0	0	0	0	0
CS1	22	2	normal	normal	1	2	1	Med	4	>3	0	0	0		Occasional	0	Occasional	No	9	1	2	2	0	2	0	0	0	0	0	0
CS1	22	2	normal	normal	1	2	1	Med	4	>3	0	0	0		Occasional	0	Occasional	No	7	1	2	2	0	2	1	0	0	0	0	0
CS1	22	1	normal	normal	1	2	1	Med	5	>3	1	0	0		Occasional	0	Occasional	No	1	1	2	2	0	2	1	0	0	0	0	0
CS1	22	2	normal	normal	2	2	1	Med	3	3	1	1	0		Occasional	0	Occasional	No	18	1	2	2	1	2	0	0	0	0	0	0
CS1	22	2	normal	normal	1	2	1	Med	3	3	1	0	0		Occasional	0	Occasional	No	20	1	2	2	1	2	1	0	0	0	0	0
CS1	22	2	normal	normal	2	1	1	Med	3	3	0	1	0		Occasional	0	Occasional	No	14	1	2	2	0	2	1	0	0	0	0	0
CS1	22	1	normal	normal	1	2	1	Med	4	>3	0	0	0		Occasional	0	Occasional	No	10	1	3	2	0	2	0	0	0	0	0	0
CS1	22	2	underweight	maigreur	2	2	1	Med	5	>3	0	1	0		Occasional	0	Occasional	Occasional	15	1	1	2	0	2	0	0	0	0	0	0
CS1	22	1	normal	normal	2	3	1	Med	4	>3	1	0	0		Occasional	0	Occasional	Occasional	11	1	1	3	0	2	0	0	0	0	0	0
CS1	22	1	normal	normal	1	2	1	Med	4	>3	1	1	0		Occasional	0	Occasional	Occasional	15	1	1	2	0	2	0	0	0	0	0	0
CS1	22	2	normal	normal	1	2	1	Med	4	>3	0	0	0		Occasional	0	Occasional	Occasional	8	1	2	3	0	2	0	0	0	0	0	0
CS1	22	1	normal	normal	1	1	1	Med	4	>3	0	0	0		Occasional	0	Occasional	Occasional	0	1	2	2	0	2	0	0	0	0	0	0
CS1	22	1	normal	normal	2	2	1	Med	4	>3	0	0	0		Occasional	0	Occasional	Occasional	11	1	2	3	0	2	0	0	0	0	0	0
CS1	22	1	normal	normal	1	3	1	Med	4	>3	1	0	0		Occasional	1	Occasional	No	7	1	1	3	0	2	0	0	0	0	0	0
CS1	22	1	normal	normal	2	2	1	Med	5	>3	0	0	0		Occasional	1	Occasional	No	5	1	2	3	0	1	0	0	0	0	0	0
CS1	22	1	normal	normal	2	2	1	Med	4	>3	0	0	0		Occasional	1	Occasional	No	5	1	2	3	0	2	0	0	0	0	0	0
CS1	22	2	normal	normal	1	2	1	Med	4	>3	1	0	0		Occasional	1	Occasional	No	7	1	2	2	0	2	0	0	0	0	0	0
CS1	22	2	normal	normal	1	2	1	Med	3	3	0	0	0		Occasional	1	Occasional	No	18	1	3	2	0	1	0	0	0	0	0	0
CS1	22	2	normal	normal	1	2	1	Med	3	3	1	0	0		Occasional	1	Occasional	No	24	1	3	2	1	2	1	0	0	0	0	0
CS1	22	1	normal	normal	1	2	1	Med	4	>3	0	0	0		Occasional	1	Occasional	Occasional	10	1	2	3	0	2	1	0	0	0	0	0
CS1	22	1	normal	normal	1	1	1	Med	2	2	0	0	0		Occasional	1	Occasional		9	1	1	3	1	1	0	0	0	0	0	0
CS1	22	2	obesity	overweight	1	2	1	Med	4	>3	0	0	0		Occasional	0	Never	No	8	1	1	1	0	2	1	1	0	0	0	1
CS1	22	2	obesity	overweight	2	2	1	Med	3	3	0	0	0		Occasional	0	Never	No	23	1	1	3	1	3	0	1	0	0	0	1
CS1	22	2	overweight	overweight	1	2	1	Med	4	>3	0	0	0		Occasional	0	Never	No	6	1	2	2	0	2	0	1	0	0	0	1
CS1	22	2	normal	normal	1	1	1	Med	3	3	0	0	1	1	Occasional	0	Never	Occasional	10	1	2	3	0	2	0	1	1	0	0	0
CS1	22	1	overweight	overweight	1	1	1	Med	3	3	1	0	0		Occasional	0	Occasional	No	0	1	1	2	0	1	0	1	0	0	0	1
CS1	22	1	overweight	overweight	2	1	1	Med	3	3	1	0	0		Occasional	0	Occasional	No	0	1	2	2	0	2	0	1	0	0	0	1
CS1	22	1	overweight	overweight	1	1	1	Med	2	2	0	0	0		Occasional	0	Occasional	No	11	1	3	3	0	1	1	1	0	0	0	1
CS1	22	2	normal	normal	1	1	1	Med	4	>3	0	0	1	10	Occasional	0	Occasional	No	12	1	1	3	0	2	1	1	1	0	0	0
CS1	22	2	normal	normal	2	2	1	Med	5	>3	0	0	1	3	Occasional	0	Occasional	No	12	1	1	3	0	1	0	1	1	0	0	0
CS1	22	2	normal	normal		2	1	Med	3	3	1	0	1	15	Occasional	0	Occasional	Occasional	10	1	3	2	0	2	0	1	1	0	0	0
CS1	22	2	normal	normal	1	2	1	Med	3	3	1	0	1	3	Occasional	0	Occasional	Occasional	15	1	3	2	1	2	0	1	1	0	0	0
CS1	22	1	normal	normal	1	2	1	Med	4	>3	1	0	0		Occasional	1	Frequent	Occasional	11	1	3	2	0	2	1	1	0	1	0	0
CS1	22	1	normal	normal	2	2	1	Med	4	>3	0	1	1	6	Occasional	1	Occasional	Occasional	6	1	1	3	0	2	0	1	1	0	0	0
CS1	22	1	normal	normal	2	2	1	Med	4	>3	0	0	0		Frequent	0	Frequent	Occasional	0	1	3	3	0	1	0	1	0	1	0	0
CS1	22	2	normal	normal	1	2	1	Med	5	>3	0	0	0		Frequent	0	Occasional	Occasional	12	1	1	1	0	1	0	1	0	1	0	0
CS1	22	1	normal	normal	1	2	1	Med	3	3	1	0	0		Frequent	1	Frequent	Regular	6	1	3	3	0	2	0	1	0	1	0	0
CS1	22	1	normal	normal	2	2	1	Med	3	3	1	0	0		Frequent	1	Occasional	Occasional	6	1	3	2	0	2	0	1	0	1	0	0
CS1	22	1	normal	normal	1	2	1	Med	3	3	0	0	1	10	Frequent	0	Frequent	Occasional	3	1	2	3	0	1	0	2	1	1	0	0
CS1	22	2	normal	normal	2	1	1	Med	5	>3	0	0	1	3	Frequent	0	Occasional	No	18	1	1	1	1	2	0	2	1	1	0	0
CS1	22	1	overweight	overweight	2	1	1	Med	4	>3	1	0	0		Frequent	1	Frequent	No	21	1	2	3	1	3	1	2	0	1	0	1
CS1	22	1	overweight	overweight	1	2	1	Med	3	3	0	0	1	10	Frequent	0	Occasional	No	2	1	1	3	0	2	0	3	1	1	0	1
CS1	22	2	underweight	maigreur	1	2	1	Med	5	>3	0	0	0		Never	0	Never	No	11	1	1	3	0	1	0	0	0	0	0	0
CS1	22	1	normal	normal	1	1	1	Med	4	>3	0	0	0		Never	0	Never	No	22	1	1	3	0	1		0	0	0	0	0
CS1	22	2	normal	normal	1	3	1	Med	3	3	0	0	0		Never	0	Never	No	15	1	1	3	0	2	0	0	0	0	0	0
CS1	22	2	normal	normal	2	1	1	Med	4	>3	1	1	0		Never	0	Never	No	3	1	2	3	1	2	0	0	0	0	0	0
CS1	22	2	normal	normal	2	1	1	Med	3	3	0	0	0		Never	0	Never	No	12	1	2	1	0	2	0	0	0	0	0	0
CS1	22	1	normal	normal	1	1	1	Med	4	>3	1	0	0		Frequent	0	Occasional			1	1	2	1	3	0	1	0	1	0	0
CS1	22	1	normal	normal	2	2	1	Med	4	>3	1	0	0		Frequent	0	Occasional			1	3	3	0	2	0	1	0	1	0	0
CS1	23	2	normal	normal	1	2	1	Med	4	>3	0	0	0		Occasional	0	Never	No	1	1	2	2	0	2	1	0	0	0	0	0
CS1	23	2	normal	normal	2	2	1	Med	4	>3	0	0	0		Occasional	0	Never	No	18	1	3	3	0	2	0	0	0	0	0	0
CS1	23	2	underweight	maigreur	2	1	1	Med	5	>3	1	0	1	20	Occasional	0	Never	No	16	1	1	1	0	1	1	1	1	0	0	0
CS1	23	2	normal	normal	1	2	1	Med	5	>3	0	0	0		Occasional	0	Never	No	6	1	1	3	0	1	0	0	0	0	0	0
CS1	23	2	normal	normal	1	1	1	Med	2	2	1	0	0		Occasional	0	Never	No	22	1	1	2	0	2	0	0	0	0	0	0
CS1	23	2	normal	normal	2	2	1	Med	5	>3	0	0	0		Occasional	0	Never	No	13	1	2	2	1	1	0	0	0	0	0	0
CS1	23	2	normal	normal	2	2	1	Med	5	>3	1	0	0		Occasional	0	Never	No	19	1	3	2	1	2	1	0	0	0	0	0
CS1	23	2	normal	normal	1	2	1	Med	4	>3	0	0	0		Occasional	0	Never	No	11	1	3	3	0	2	0	0	0	0	0	0
CS1	23	2	normal	normal	1	1	1	Med	5	>3	1	1	0		Occasional	0	Never	No	14	1	3	2	0	2	0	0	0	0	0	0
CS1	23	2	underweight	maigreur	1	2	1	Med	5	>3	0	0	0		Occasional	0	Occasional	No	3	1	1	2	0	1	1	0	0	0	0	0
CS1	23	2	underweight	maigreur	2	2	1	Med	5	>3	0	0	0		Occasional	0	Occasional	No	7	1	2	3	0	2	1	0	0	0	0	0
CS1	23	2	underweight	maigreur	2	2	1	Med	5	>3	0	0	0		Occasional	0	Occasional	No	14	1	>3	3	1	2	0	0	0	0	0	0
CS1	23	2	normal	normal	1	2	1	Med	5	>3	0	0	0		Occasional	0	Occasional	No	5	1	1	3	0	2	0	0	0	0	0	0
CS1	23	2	normal	normal	2	2	1	Med	5	>3			0		Occasional	0	Occasional	No	13	1	1	2	0	2	1	0	0	0	0	0
CS1	23	2	normal	normal	1	2	1	Med	5	>3	0	1	0		Occasional	0	Occasional	No	15	1	1	2	0	2	1	0	0	0	0	0
CS1	23	2	normal	normal	2	2	1	Med	5	>3	0	0	0		Occasional	0	Occasional	No	22	1	1	2	0	1	1	0	0	0	0	0
CS1	23	2	normal	normal	2	2	1	Med	5	>3	1	0	0		Occasional	0	Occasional	No	8	1	1	3	1	2	1	0	0	0	0	0
CS1	23	2	normal	normal	2	2	1	Med	4	>3	0	0	0		Occasional	0	Occasional	No	19	1	1	2	1	2	0	0	0	0	0	0
CS1	23	2	normal	normal	1	2	1	Med	5	>3	0	0	0		Occasional	0	Occasional	No	12	1	3	2	1	2	0	0	0	0	0	0
CS1	23	1	normal	normal	2	2	1	Med	5	>3	0	0	0		Occasional	0	Occasional	No	9	1	3	2	0	2	1	0	0	0	0	0
CS1	23	1	normal	normal	1	3	1	Med	4	>3	0	0	0		Occasional	0	Occasional	No	15	1	3	1	0	1	0	0	0	0	0	0
CS1	23	1	normal	normal	2	2	1	Med	5	>3	1	0	0		Occasional	0	Occasional	No		1	>3	3	0	2	0	0	0	0	0	0
CS1	23	2	normal	normal	1	2	1	Med	4	>3	0	0	0		Occasional	0	Occasional	Occasional	12	1	1	3	1	1	0	0	0	0	0	0
CS1	23	2	normal	normal	2	1	1	Med	5	>3	1	0	0		Occasional	0	Occasional	Occasional	21	1	2	2	0	3	0	0	0	0	0	0
CS1	23	2	normal	normal	2	2	1	Med	5	>3	0	0	0		Occasional	0	Occasional	Occasional	18	1	2	2	0	2	1	0	0	0	0	0
CS1	23	2	normal	normal	1	1	1	Med	5	>3	1	0	0		Occasional	0	Occasional	Occasional	17	1	3	3	1	2	1	0	0	0	0	0
CS1	23	1	normal	normal	2	2	1	Med	5	>3	0	0	0		Occasional	0	Occasional		12	1	2	2	0	2	1	0	0	0	0	0
CS1	23	2	normal	normal	2	2	1	Med	2	2	0	0	0		Occasional	1	Never	No		1	1	2	1	1	1	0	0	0	0	0
CS1	23	1	normal	normal	1	2	1	Med	4	>3	0	0	0		Occasional	1	Occasional	No	25	1	1	2	0	3	0	0	0	0	0	0
CS1	23	2	normal	normal	1	1	1	Med	5	>3	1	0	0		Occasional	1	Occasional	Occasional	7	1	1	1	1	2	1	0	0	0	0	0
CS1	23	1	normal	normal	1	2	1	Med	4	>3	0	0	0		Occasional	1	Occasional		5	1	1	2	0	2	0	0	0	0	0	0
CS1	23	2	overweight	overweight	1	2	1	Med	4	>3	0	1	0		Occasional	0	Never	No	12	1	1	2	0	2	0	1	0	0	0	1
CS1	23	2	normal	normal	2	2	1	Med	4	>3	0	0	1	5	Occasional	0	Never	No	15	1	1	2	0	2	0	1	1	0	0	0
CS1	23	2	overweight	overweight	1	2	1	Med	5	>3	1	0	0		Occasional	0	Occasional	No	25	1	2	2	1	2	1	1	0	0	0	1
CS1	23	1	overweight	overweight	2	2	1	Med	5	>3	0	0	0		Occasional	0	Occasional	No	4	1	3	3	0	1	0	1	0	0	0	1
CS1	23	2	normal	normal	2	2	1	Med	5	>3	0	0	1	5	Occasional	0	Occasional	No	10	1	2	2	0	2	1	1	1	0	0	0
CS1	23	2	overweight	overweight	1	2	1	Med	5	>3	0	1	0		Occasional	0	Occasional	Occasional	7	1	2	2	1	2	0	1	0	0	0	1
CS1	23	2	normal	normal	1	2	1	Med	5	>3	0	0	1	10	Occasional	0	Occasional	Occasional	9	1	1	2	0	2	1	1	1	0	0	0
CS1	23	1	normal	normal	2	2	1	Med	5	>3	1	0	1	5	Occasional	0	Occasional	Occasional	7	1	2	3	0	1	0	1	1	0	0	0
CS1	23	1	normal	normal	2	2	1	Med	5	>3	1	0	0		Occasional	1	Frequent	No	15	1	1	1	0	3	0	1	0	1	0	0
CS1	23	2	normal	normal	1	2	1	Med	5	>3	0	0	0		Occasional	1	Frequent	Occasional	16	1	1	2	0	2	1	1	0	1	0	0
CS1	23	2	overweight	overweight	1	2	1	Med	5	>3	0	0	0		Occasional	1	Occasional	No	16	1	2	2	1	2	0	1	0	0	0	1
CS1	23	1	normal	normal	2	1	1	Med	5	>3	0	0	0		Frequent	0	Occasional	No	7	1	1	3	0	2	1	1	0	1	0	0
CS1	23	1	normal	normal	1	2	1	Med	5	>3	0	0	0		Frequent	1	Frequent	No	5	1	2	2	0	2	0	1	0	1	0	0
CS1	23	1	overweight	overweight	1	2	1	Med	5	>3	0	0	1	10	Occasional	1	Occasional		12	1	2	2	0	2	0	2	1	0	0	1
CS1	23	1	overweight	overweight	1	2	1	Med	5	>3	0	0	0		Frequent	0	Frequent	Occasional	5	1	1	2	0	2	0	2	0	1	0	1
CS1	23	1	normal	normal	1	1	1	Med	5	>3	1	0	1	15	Frequent	0	Frequent	Occasional	12	1	>3	3	0	2	0	2	1	1	0	0
CS1	23	2	normal	normal	1	2	1	Med	5	>3	0	0	1	20	Frequent	0	Occasional	No	20	1	3	2	0	1	1	2	1	1	0	0
CS1	23	2	normal	normal	2	1	1	Med	2	2	1	0	1	10	Frequent	0	Occasional	Occasional		1	>3	1	0	2	0	2	1	1	0	0
CS1	23	2	normal	normal	1	1	1	Med	4	>3	1	0	1	7	Frequent	1	Frequent	Occasional	6	1	1	2	0	2	0	2	1	1	0	0
CS1	23	2	overweight	overweight	2	2	1	Med	5	>3	1	0	1	10	Frequent	1	Frequent	No	4	1	1	2	0	2	1	3	1	1	0	1
CS1	23	2	underweight	maigreur	1	2	1	Med	5	>3	0	0	0		Never	0	Never	No	18	1	1	3	0	1	0	0	0	0	0	0
CS1	23	2	normal	normal	1	3	1	Med	5	>3	0	1	0		Never	0	Never	No	2	1	1	3	0	2	0	0	0	0	0	0
CS1	23	2	normal	normal	1	2	1	Med	6	>3	0	1	0		Occasional	0	Never	No	14	1	1	1	0	2		0	0	0	0	0
CS1	23	2	normal	normal	1	2	1	Med	5	>3	0	0	0		Occasional	0	Never	No	6	1	3	3	0	2	0	0	0	0	0	0
CS1	23	2	overweight	overweight	1	2	1	Med	3	3	0	1	0		Never	0	Never	No	22	1	3	3	0	2	0	1	0	0	0	1
CS1	24	2	normal	normal	1	2	1	Med	4	>3	0	0	0		Occasional	0	Never	No	2	1	1	2	0	2	0	0	0	0	0	0
CS1	24	1	overweight	overweight	2	2	1	Med	5	>3	1	1	0		Occasional	0	Occasional	No	32	1	2	3	0		1	1	0	0	0	1
CS1	24	1	normal	normal	2	2	1	Med	5	>3		1	1	6	Occasional	0	Occasional	No	8	1	2	3	0	1	0	1	1	0	0	0
CS1	24	2	normal	normal	2	1	1	Med	5	>3	0	1	0		Occasional	0	Occasional	No	21	1	1	2	0	2	0	0	0	0	0	0
CS1	24	2	normal	normal	2	2	1	Med	5	>3	0	0	0		Occasional	0	Occasional	No	16	1	1	2	0	2	0	0	0	0	0	0
CS1	24	2	normal	normal	2	2	1	Med	4	>3	0	0	0		Occasional	0	Occasional	No	15	1	1	1	0	2	0	0	0	0	0	0
CS1	24	2	normal	normal	1	3	1	Med	5	>3	1	1	0		Occasional	0	Occasional	No	13	1	3	2	1	1	1	0	0	0	0	0
CS1	24	2	underweight	maigreur	1	2	1	Med	5	>3		0	0		Occasional	0	Occasional	Occasional	18	1	1	2	1	2	1	0	0	0	0	0
CS1	24	1	normal	normal	1	2	1	Med	4	>3	0	1	0		Occasional	0	Occasional	Occasional	12	1	1	2	0	1	0	0	0	0	0	0
CS1	24	2	normal	normal	2	2	1	Med	5	>3	0	1	0		Occasional	1	Occasional	No	23	1	1	2	1	2	1	0	0	0	0	0
CS1	24	2	normal	normal	1	3	1	Med	5	>3	0	1	0		Occasional	1	Occasional	No	7	1	3	2	1	2	0	0	0	0	0	0
CS1	24	2	normal	normal	2	2	1	Med	4	>3	1	1	0		Occasional	1	Occasional	Occasional	28	1	3	3	1	2	0	0	0	0	0	0
CS1	24	1	normal	normal	2	2	1	Med	5	>3	0	0	0		Frequent	0	Occasional	Occasional	12	1	2	3	0	2	1	1	0	1	0	0
CS1	24	1	normal	normal	2	2	1	Med	5	>3	1	0	0		Frequent		Occasional	Occasional		1	1	2	0	2	0	1	0	1	0	0
CS1	24	2	normal	normal	2	2	1	Med	5	>3	1	0	1	10	Frequent	0	Occasional	No	16	1	3	3	0	2	1	2	1	1	0	0
CS1	24	1	normal	normal	2	2	1	Med	5	>3	0	1	1	10	Frequent	1	Frequent	Occasional	10	1	1	3	0	2	0	2	1	1	0	0
CS1	24	2	normal	normal	1	2	1	Med	5	>3	0	1	0		Never	0	Never	No	10	1	1	2	1	2	0	0	0	0	0	0
CS1	24	1	normal	normal	1	3	1	Med	5	>3	0	0	0		Never	0	Never	No	17	1	1	3	0	2	0	0	0	0	0	0
CS1	25	1	normal	normal	1	2	1	Med	5	>3	0	1	0		Frequent	0	Occasional	Occasional	17	1	3	2	0	2	1	1	0	1	0	0
CS1	25	1	underweight	maigreur	1	2	1	Med	3	3	1	0	0		Occasional	0	Occasional	Occasional	15	1	>3	1	0	2	0	0	0	0	0	0
CS1	25	1	normal	normal	2	2	1	Med	5	>3	1	0	0		Occasional	1	Occasional	No	7	1	>3	3	0	2	0	0	0	0	0	0
CS1	25	1	normal	normal	2	2	1	Med	5	>3	1	0	0		Occasional	1	Occasional	Occasional	10	1	3	3	0	2	0	0	0	0	0	0
CS1	25	2	normal	normal	2	2	1	Med	5	>3	0	0	1	20	Occasional	0	Occasional	No	17	1	1	3	0	2	0	1	1	0	0	0
CS1	26	1	normal	normal	2	2	1	Med	5	>3	0	0	1	10	Occasional		Occasional	Occasional		1	3	1	0	1	0	1	1	0	0	0
CS1	26	1	normal	normal	2	2	1	Med	5	>3	1	0	1	25	Frequent	0	Occasional	Occasional	19	1	1	2	0	2	0	2	1	1	0	0
CS1	26	1	normal	normal	2	2	1	Med	2	2	1	0	1	10	Frequent	1	Frequent	Regular	3	1	1	3	0	2	0	2	1	1	0	0
CS1	27	1	normal	normal	2	2	1	Med	5	>3	0	0	0		Never	0	Occasional	No	1	1	>3	3	0	1	0	0	0	0	0	0
CS1	35	1	normal	normal	1	2	1	Med	4	>3	1	0	0		Occasional	1	Occasional	No	6	1	1	3	0	2	0	0	0	0	0	0
CS1	19	1	normal	normal	1	3	1	Med	2	2	0	0	0		Occasional	0	Never	No	21	0			0	3	0	1	0	0	1	0
CS1	19	2	normal	normal	2	1	1	Med	2	2	0	0	0		Occasional	0	Never	No	9	0			0	2	0	1	0	0	1	0
CS1	19	2	normal	normal	2	1	1	Med	2	2	1	0	0		Occasional	0	Occasional	No	4	0			0	1	0	1	0	0	1	0
CS1	19	2	normal	normal	1	2	1	Med	2	2	0	0	0		Occasional	0	Occasional	No	10	0				1	0	1	0	0	1	0
CS1	19	2	normal	normal	1	2	1	Med	2	2	0	0	0		Frequent	1	Occasional	Occasional	5	0			0	2	0	2	0	1	1	0
CS1	19	2	normal	normal	1	1	1	Med	2	2	0	0	0		Never	0	Never	No	16	0			0	2	0	1	0	0	1	0
CS1	20	2	normal	normal	2	1	1	Med	2	2	0	1	0		Occasional	0	Never	No	6	0			0	2	0	1	0	0	1	0
CS1	20	2	normal	normal	1	1	1	Med	3	3	0	1	0		Occasional	0	Never	No	14	0			0	2	0	1	0	0	1	0
CS1	20	2			1	2	1	Med	2	2	0	0	0		Occasional	0	Never	No	18	0			1	2	0	1	0	0	1
CS1	20	2	normal	normal	1	2	1	Med	2	2	1	1	1	3	Occasional	0	Occasional	Occasional	19	0			0	2	0	2	1	0	1	0
CS1	20	2	normal	normal	2	2	1	Med	3	3	1	0	0		Frequent	0	Occasional	No	18	0			0	2	0	2	0	1	1	0
CS1	20	1	normal	normal	1	2	1	Med	3	3	1	0	1	20	Occasional	1	Frequent	Regular	8	0			0	2	0	3	1	1	1	0
CS1	20	2	normal	normal	1	2	1	Med	2	2	0	0	1	5	Frequent	1	Frequent	Regular		0			0	2	0	3	1	1	1	0
CS1	20	2	normal	normal	1	3	1	Med	2	2	0	1	0		Never	0	Never	No	14	0			0	2	0	1	0	0	1	0
CS1	20	2	normal	normal	1	2	1	Med	2	2	0	0	0		Never	0	Never	No	12	0			0	2	0	1	0	0	1	0
CS1	20	1	normal	normal	1	1	1	Med	2	2	0	0	0		Occasional	1	Occasional			0			0	1	0	1	0	0	1	0
CS1	21	2	normal	normal	2	2	1	Med	2	2		0	0		Occasional		Occasional	Occasional		0			0	2	0	1	0	0	1	0
CS1	21	2	underweight	maigreur	1	1	1	Med	3	3	0	1	0		Occasional	0	Never	No		0			0	2	0	1	0	0	1	0
CS1	21	2	normal	normal	1	1	1	Med	4	>3	0	0	0		Occasional	0	Never	No	19	0			1		1	1	0	0	1	0
CS1	21	2	normal	normal	1	2	1	Med	2	2	0	0	0		Occasional	0	Never	No	18	0			0	1	1	1	0	0	1	0
CS1	21	2	normal	normal	1	3	1	Med	3	3	0	0	0		Occasional	0	Never	No	9	0			0	2	0	1	0	0	1	0
CS1	21	2	normal	normal	2	1	1	Med	3	3	0	1	0		Occasional	0	Never	No		0			1	2	1	1	0	0	1	0
CS1	21	2	normal	normal	1	2	1	Med	3	3	0	0	0		Occasional	0	Never	No	15	0			0	1	0	1	0	0	1	0
CS1	21	2	normal	normal	2	2	1	Med	3	3	0	0	0		Occasional	0	Never	No	2	0			0	1	0	1	0	0	1	0
CS1	21	2	normal	normal	2	2	1	Med	2	2	0	0	0		Occasional	0	Occasional	No	25	0			0	2	1	1	0	0	1	0
CS1	21	2	normal	normal	1	2	1	Med	3	3		1	0		Occasional	0	Occasional	No	5	0			0	1	0	1	0	0	1	0
CS1	21	2	normal	normal	1	2	1	Med	3	3	0	0	0		Occasional	0	Occasional	No	28	0			0	2	0	1	0	0	1	0
CS1	21	1	normal	normal	2	1	1	Med	3	3	0	0	0		Occasional	0	Occasional	No	15	0			0	2	0	1	0	0	1	0
CS1	21	2	normal	normal	1	2	1	Med	3	3	0	0	0		Occasional	0	Occasional	No	4	0			1	1	0	1	0	0	1	0
CS1	21	1	normal	normal	2	2	1	Med	4	>3	0	0	0		Occasional	0	Occasional	Occasional	5	0			0	2	0	1	0	0	1	0
CS1	21	2	normal	normal	2	1	1	Med	3	3	0	0	0		Occasional	1	Occasional	No	14	0			0	2	0	1	0	0	1	0
CS1	21	2			1	3	1	Med	3	3	0	1	0		Occasional	1	Occasional	No	19	0			0	2	1	1	0	0	1
CS1	21	1	normal	normal	1	2	1	Med	4	>3	0	0	0		Occasional	1	Occasional	Occasional	19	0			0	2	0	1	0	0	1	0
CS1	21	2	overweight	overweight	2	2	1	Med	3	3	1	0	0		Occasional	0	Occasional	No	12	0			1	2	1	2	0	0	1	1
CS1	21	2	normal	normal	1	2	1	Med	4	>3	0	0	1	10	Occasional	0	Occasional	Occasional	14	0			1	2	0	2	1	0	1	0
CS1	21	2	normal	normal	1	2	1	Med	4	>3	1	0	1	10	Occasional	1	Occasional	Occasional	20	0			0	2	0	2	1	0	1	0
CS1	21	1	normal	normal	1	1	1	Med	3	3	0	0	1	10	Occasional	1	Occasional	Occasional	10	0			0	1	0	2	1	0	1	0
CS1	21	2	normal	normal	2	2	1	Med	4	>3	0	1	0		Frequent	0	Frequent	Occasional	15	0			0	2	0	2	0	1	1	0
CS1	21	2	normal	normal	2	2	1	Med	3	3	0	0	0		Frequent	0	Occasional	Occasional	10	0			0	1	1	2	0	1	1	0
CS1	21	1	normal	normal	1	3	1	Med	2	2	0	0	0		Frequent	1	Frequent	No	17	0			0	2	0	2	0	1	1	0
CS1	21	2	normal	normal	2	2	1	Med	3	3	1	0	1	10	Frequent		Occasional	Occasional	13	0			0	2	1	3	1	1	1	0
CS1	21	2	underweight	maigreur	2	3	1	Med	3	3	0	0	0		Never	0	Never	No	21	0			0	2	1	1	0	0	1	0
CS1	21	2	normal	normal	1	1	1	Med	4	>3	1	0	0		Never	0	Never	No	15	0			0	2	0	1	0	0	1	0
CS1	21	2	normal	normal	2	1	1	Med	3	3	0	1	0		Never	0	Never	No	10	0			0	1		1	0	0	1	0
CS1	21	2	normal	normal	2	1	1	Med	3	3	1	1	0		Never	0	Never	No	6	0			0	1	0	1	0	0	1	0
CS1	21	2	normal	normal	2	2	1	Med	3	3	0	0	0		Never	0	Never	No	15	0			0	1	0	1	0	0	1	0
CS1	21	2			2	2	1	Med	3	3	0	1	0		Never	0	Never	No	26	0			0	2	1	1	0	0	1
CS1	21	2	normal	normal	1	2	1	Med	4	>3	0	0	0		Occasional	0	Never			0			0	2	0	1	0	0	1	0
CS1	22	2	underweight	maigreur	1	2	1	Med	5	>3	0	0	0		Occasional	0	Never	No	14	0			0	2	0	1	0	0	1	0
CS1	22	1	underweight	maigreur	1	2	1	Med	4	>3	0	1	0		Occasional	0	Never	No	21	0			0	2	0	1	0	0	1	0
CS1	22	2	normal	normal	2	2	1	Med	5	>3	0	0	0		Occasional	0	Never	No	20	0			0	2	1	1	0	0	1	0
CS1	22	2	normal	normal	2	2	1	Med	4	>3	0	0	0		Occasional	0	Never	No	5	0			0	1	0	1	0	0	1	0
CS1	22	1	normal	normal	2	1	1	Med	5	>3	0	0	0		Frequent	0	Occasional	No	28	0			0	2	1	2	0	1	1	0
CS1	22	2	underweight	maigreur	1	1	1	Med	3	3	0	0	0		Occasional	0	Never	No	20	0			0	2	1	1	0	0	1	0
CS1	22	2	underweight	maigreur	1	2	1	Med	3	3	0	0	0		Occasional	0	Never	No	12	0			1	1	0	1	0	0	1	0
CS1	22	2	normal	normal	2	2	1	Med	4	>3	1	0	0		Occasional	0	Never	No	17	0			0	2	1	1	0	0	1	0
CS1	22	2	normal	normal	1	2	1	Med	4	>3	0	0	0		Occasional	0	Never	No	18	0			0	2	0	1	0	0	1	0
CS1	22	2	normal	normal	1	2	1	Med	3	3	1	1	0		Occasional	0	Never	No	24	0			0	2	1	1	0	0	1	0
CS1	22	2	normal	normal	2	2	1	Med	5	>3	0	0	0		Occasional	0	Occasional	No	23	0			0	2	1	1	0	0	1	0
CS1	22	2	normal	normal	2	2	1	Med	4	>3	0	1	0		Occasional	0	Occasional	No	29	0			0	2	1	1	0	0	1	0
CS1	22	1	normal	normal	1	3	1	Med	4	>3	0	1	0		Occasional	0	Occasional	No	20	0			1	2	0	1	0	0	1	0
CS1	22	2	normal	normal	1	2	1	Med	3	3	0	0	0		Occasional	0	Occasional	No	17	0			0	2	0	1	0	0	1	0
CS1	22	2	normal	normal	2	2	1	Med	3	3	0	0	0		Occasional	0	Occasional	No	7	0			1	2	0	1	0	0	1	0
CS1	22	2	underweight	maigreur	2	1	1	Med	4	>3	0	0	0		Occasional	0	Occasional	Occasional	17	0			0	2	0	1	0	0	1	0
CS1	22	2	normal	normal	1	2	1	Med	4	>3	0	0	0		Occasional	0	Occasional	Occasional	11	0			0	2	0	1	0	0	1	0
CS1	22	1	normal	normal	1	2	1	Med	4	>3	0	0	0		Occasional	0	Occasional	Occasional	28	0			0	2	0	1	0	0	1	0
CS1	22	2	normal	normal	1	2	1	Med	4	>3	0	0	0		Occasional	1	Occasional	No	3	0			1	1	0	1	0	0	1	0
CS1	22	1	normal	normal	2	2	1	Med	5	>3	0	0	0		Occasional	1	Occasional	Occasional	7	0			0	2	0	1	0	0	1	0
CS1	22	1	normal	normal	2	1	1	Med	4	>3	0	0	0		Occasional	1	Occasional	Occasional	17	0			0	2	1	1	0	0	1	0
CS1	22	2	obesity	overweight	2	3	1	Med	3	3	0	0	0		Occasional	0	Never	No	10	0			0	2	0	2	0	0	1	1
CS1	22	2	normal	normal	1	2	1	Med	4	>3	0	0	1	3	Occasional	0	Never	No	6	0			0	2	0	2	1	0	1	0
CS1	22	2			1	2	1	Med	3	3	1	0	1	20	Occasional	0	Occasional	No	18	0			1	2	1	2	1	0	1
CS1	22	2	normal	normal	1	1	1	Med	3	3	0	0	1	20	Occasional	1	Occasional	No	9	0			0	2	0	2	1	0	1	0
CS1	22	1	normal	normal	1	2	1	Med	3	3	0	0	1	10	Occasional	1	Occasional	Occasional	7	0			0	2	0	2	1	0	1	0
CS1	22	2	normal	normal	2	2	1	Med	3	3	0	0	0		Frequent	0	Occasional	No	13	0			0	3	1	2	0	1	1	0
CS1	22	2	overweight	overweight	1	2	1	Med	3	3	1	1	1	10	Occasional	1	Occasional	Occasional	21	0			0	2	0	3	1	0	1	1
CS1	22	1	overweight	overweight	2	2	1	Med	5	>3	0	0	1	13	Frequent	1	Frequent	Occasional	7	0			0	2	0	4	1	1	1	1
CS1	22	2	normal	normal	2	2	1	Med	4	>3	0	1	0		Never	0	Never	No	1	0			0	2	0	1	0	0	1	0
CS1	22	2			2	1	1	Med	3	3	0	0	0		Never	0	Never	No	14	0			0	2	1	1	0	0	1
CS1	22	2	normal	normal	1	2	1	Med	4	>3	0	0	0		Occasional	0	Never	No	13	0			1	1	0	1	0	0	1	0
CS1	22	2	normal	normal	1	2	1	Med	6	>3	0	0	0		Frequent	0	Occasional	Occasional	20	0			0	2		2	0	1	1	0
CS1	23	1	overweight	overweight	1	2	1	Med	5	>3	0	0	0		Frequent	0	Never	No	15	0			0	2	0	3	0	1	1	1
CS1	23	1	normal	normal	2	2	1	Med	5	>3	0	0	0		Occasional	0	Never	No	8	0			0	2	1	1	0	0	1	0
CS1	23	2	normal	normal	2	2	1	Med	5	>3	0	1	0		Occasional	0	Never	No	17	0			0	2	0	1	0	0	1	0
CS1	23	2	normal	normal	2	2	1	Med	5	>3	0	0	0		Occasional	0	Never	No	17	0			0	2	0	1	0	0	1	0
CS1	23	2	normal	normal	2	2	1	Med	5	>3	1	0	0		Occasional	0	Occasional	No	19	0			1	2	0	1	0	0	1	0
CS1	23	2	normal	normal	2	1	1	Med	5	>3	0	1	0		Occasional	0	Occasional	No	13	0			0	2	1	1	0	0	1	0
CS1	23	1	normal	normal	2	2	1	Med	5	>3	0	0	0		Occasional	0	Occasional		20	0			0	2	0	1	0	0	1	0
CS1	23	2	normal	normal	2	2	1	Med	4	>3	0	1	0		Occasional	0	Occasional		3	0			0	1	0	1	0	0	1	0
CS1	23	2	normal	normal	1	2	1	Med	4	>3	0	1	0		Occasional	1	Occasional	No	28	0			0	2	1	1	0	0	1	0
CS1	23	1	normal	normal	2	2	1	Med	5	>3	0	0	0		Occasional	1	Occasional	Occasional	17	0			0	2	0	1	0	0	1	0
CS1	23	1	overweight	overweight	1	1	1	Med	5	>3	0	1	0		Occasional	0	Occasional	No	22	0			0	2	0	2	0	0	1	1
CS1	23	2	overweight	overweight	2	2	1	Med	4	>3	1	0	0		Occasional	0	Occasional	Occasional	13	0			1	2	0	2	0	0	1	1
CS1	23	2	normal	normal	1	2	1	Med	5	>3	0	0	1	15	Occasional	1	Frequent	No	8	0			0	3	0	3	1	1	1	0
CS1	23	1	normal	normal	2	2	1	Med	3	3	0	0	0		Frequent	1	Frequent	Occasional	9	0			0	2	0	2	0	1	1	0
CS1	23	2	normal	normal	2	2	1	Med	4	>3	0	0	1	10	Frequent	0	Occasional	No	12	0			0	2	0	3	1	1	1	0
CS1	23	2	normal	normal	2	1	1	Med	5	>3	1	0	1	13	Frequent	0	Occasional	No		0			0	2	1	3	1	1	1	0
CS1	23	2	normal	normal	1	2	1	Med	5	>3	1	1	1	20	Frequent	0	Occasional	Regular	32	0			1	2	1	3	1	1	1	0
CS1	23	2	normal	normal	1	1	1	Med	4	>3	1	1	1	10	Frequent	1	Frequent	Regular	12	0			0	2	0	3	1	1	1	0
CS1	23	2	normal	normal	1	1	1	Med	5	>3	0	1	0		Never	0	Never	No	6	0			0	2	1	1	0	0	1	0
CS1	23	2	normal	normal	1	1	1	Med	4	>3	0	1	0		Never	0	Never	No	20	0			1	2	0	1	0	0	1	0
CS1	23	2	normal	normal	2	2	1	Med	6	>3	0	0	0		Never	0	Never	No	6	0			1	1		1	0	0	1	0
CS1	23	2	normal	normal	1	2	1	Med	6	>3	0	0	0		Occasional	0	Never	No	18	0			0	2		1	0	0	1	0
CS1	24	2	normal	normal	1	1	1	Med	5	>3	0	1	0		Occasional	0	Never	No	15	0			1	1	0	1	0	0	1	0
CS1	24	1	normal	normal	2	2	1	Med	4	>3	0	0	0		Occasional	0	Never	No	16	0			1	2	0	1	0	0	1	0
CS1	24	2	normal	normal	2	2	1	Med	5	>3	0	0	0		Occasional	0	Occasional	No	9	0			0	1	0	1	0	0	1	0
CS1	24	2	normal	normal	1	1	1	Med	5	>3	0	0	0		Occasional	0	Occasional	No	25	0			0	2	1	1	0	0	1	0
CS1	24	1	obesity	overweight	1	1	1	Med	4	>3	1	0	0		Occasional	1	Occasional	No		0			1	2	0	2	0	0	1	1
CS1	24	2	normal	normal	2	2	1	Med	5	>3	0	1	0		Frequent	0	Occasional	No	14	0			0	2	0	2	0	1	1	0
CS1	24	2	normal	normal	1	1	1	Med	5	>3	0	0	0		Never	0	Never	No	23	0			0	2	1	1	0	0	1	0
CS1	24	2	normal	normal	2	2	1	Med	6	>3	1	0	1	20	Never	0	Never	No	18	0			0	2		2	1	0	1	0
CS1	24	2	normal	normal	1	2	1	Med	6	>3	0	0	1	2	Frequent	0	Occasional	No	23	0			1	2		3	1	1	1	0
CS1	25	2	normal	normal	1	1	1	Med	5	>3	0	0	0		Occasional	0	Occasional	No	6	0			0	2	0	1	0	0	1	0
CS1	25	1	normal	normal	1	2	1	Med	5	>3	0	0	1	20	Occasional	0	Occasional	No	9	0			0	2	0	2	1	0	1	0
CS1	25	1	normal	normal	2	2	1	Med	5	>3	0	1	1	10	Frequent	0	Frequent	Occasional	11	0			0	2	0	3	1	1	1	0
CS1	27	2	normal	normal	2	2	1	Med	4	>3	1	0	1	6	Occasional	0	Occasional	No	5	0			0	2	1	2	1	0	1	0
CS1	28	1	normal	normal	1	1	1	Med	2	2	0	0	1	5	Frequent	0	Occasional	Regular	9	0			0	2	0	3	1	1	1	0
CS1	19	2	normal	normal	1	2	1	Med	2	2	0	0	0		Frequent	0	Occasional	No	19							1	0	1		0
CS1	19	1	normal	normal	1	1	1	Med	2	2	0	0	0		Occasional	0	Occasional	No	7							0	0	0		0
CS1	19	2	normal	normal		2	1	Med	3	3	0	0	0		Occasional	0	Occasional	No					0	2	0	0	0	0		0
CS1	19	1	normal	normal	2	1	1	Med	2	2	0	0	0		Occasional	1	Occasional	Occasional	12							0	0	0		0
CS1	19	2	normal	normal	1	3	1	Med	2	2	0	0	0		Occasional		Occasional	No	19							0	0	0		0
CS1	20	2	underweight	maigreur	1	1	1	Med	3	3	0	0	0		Occasional	0	Never	No	20							0	0	0		0
CS1	20	1	normal	normal	1	2	1	Med	2	2	0	1	0		Occasional	0	Never	No	13							0	0	0		0
CS1	20	1	normal	normal	1	1	1	Med	2	2	1	0	0		Occasional	0	Never	No	25							0	0	0		0
CS1	20	2	underweight	maigreur	1	3	1	Med	2	2	0	0	0		Occasional	0	Occasional	No	8							0	0	0		0
CS1	20	2	underweight	maigreur	1	1	1	Med	3	3	1	0	0		Occasional	0	Occasional	No	5							0	0	0		0
CS1	20	2	normal	normal	2	2	1	Med	2	2	0	0	0		Occasional	0	Occasional	No	24							0	0	0		0
CS1	20	2	normal	normal	2	2	1	Med	2	2		0	0		Occasional	0	Occasional	No	10							0	0	0		0
CS1	20	2	normal	normal	1	1	1	Med	2	2	1	0	0		Occasional	0	Occasional	No								0	0	0		0
CS1	20	2	normal	normal	1	1	1	Med	2	2	0	0	0		Occasional	0	Occasional	No	7							0	0	0		0
CS1	20	1	normal	normal	1	1	1	Med	2	2	0	0	0		Occasional	0	Occasional	Occasional	8							0	0	0		0
CS1	20	2	normal	normal	1	1	1	Med	2	2	1	0	0		Occasional	1	Occasional	No	27							0	0	0		0
CS1	20	1	normal	normal	1	1	1	Med	2	2	0	1	0		Occasional	1	Occasional	No	17							0	0	0		0
CS1	20	1	normal	normal	2	2	1	Med	2	2	1	0	0		Occasional	1	Occasional	No	10							0	0	0		0
CS1	20	1	normal	normal	2	2	1	Med	3	3	1	0	0		Occasional	1	Occasional	No	8							0	0	0		0
CS1	20	2	normal	normal	2	1	1	Med	2	2	0	1	0		Occasional	1	Occasional	Occasional	5							0	0	0		0
CS1	20	2	normal	normal	1	1	1	Med	2	2	1	0	0		Occasional	1	Occasional						0	2	0	0	0	0		0
CS1	20	2	normal	normal	1	2	1	Med	3	3	0	0	1	2	Occasional	0	Occasional	No	12							1	1	0		0
CS1	20	1	normal	normal	1	2	1	Med	2	2	1	0	0		Frequent	1	Frequent	Occasional	1							1	0	1		0
CS1	20	2	normal	normal	1	3	1	Med	3	3		0	0		Never	0	Occasional						1		1	0	0	0		0
CS1	20	2	normal	normal	1	2	1	Med	2	2	0	0	0		Occasional	0	Never									0	0	0		0
CS1	21	2	underweight	maigreur	2	2	1	Med	3	3	0	0	0		Occasional	0	Never	No								0	0	0		0
CS1	21	2	normal	normal	2	2	1	Med	2	2	0	0	0		Occasional	0	Never	No	20							0	0	0		0
CS1	21	2	normal	normal	1	1	1	Med	2	2	1	0	0		Occasional	0	Never	Occasional								0	0	0		0
CS1	21	1	normal	normal	1	1	1	Med	4	>3	1	0	0		Occasional	0	Occasional	No	0							0	0	0		0
CS1	21	1	normal	normal	2	1	1	Med	4	>3	0	0	0		Occasional	0	Occasional	No	3							0	0	0		0
CS1	21	1	normal	normal	2	3	1	Med	3	3	1	0	0		Occasional	0	Occasional	No	19							0	0	0		0
CS1	21	2	normal	normal	1	2	1	Med	2	2	0	0	0		Occasional	1	Occasional	No	21							0	0	0		0
CS1	21	1	normal	normal	1	1	1	Med	4	>3	0	0	0		Frequent	1	Frequent	No	13							2	0	1	1	0
CS1	21	2	normal	normal	2	1	1	Med	4	>3	1	0	0		Occasional	0	Occasional									0	0	0		0
CS1	22	2	underweight	maigreur	2	1	1	Med	3	3	1	1	1	5	Occasional	0	Occasional	Occasional	13							1	1	0		0
CS1	22	2	normal	normal	2	2	1	Med	5	>3	0	0	0		Occasional	0	Never	No	20							0	0	0		0
CS1	22	2	normal	normal	1	1	1	Med	3	3	0	0	0		Occasional	0	Occasional	No	10							0	0	0		0
CS1	22	1	normal	normal		3	1	Med	3	3	1	1	0		Occasional	1	Occasional	No	13							0	0	0		0
CS1	22	1	normal	normal	1	2	1	Med	5	>3	1	0	0		Occasional	1	Occasional	No	12							0	0	0		0
CS1	22	2	normal	normal	2	2	1	Med	4	>3	1	0	0		Occasional	1	Occasional	Occasional	21							0	0	0		0
CS1	22	1	normal	normal	2	2	1	Med	5	>3	0	0	0		Frequent	0	Occasional	No	3							1	0	1		0
CS1	22	1	normal	normal	2	2	1	Med	2	2	1	1	1	10	Occasional	1	Frequent	Occasional	19							2	1	1		0
CS1	22	1	normal	normal	1	2	1	Med	3	3	0	0	1	7	Frequent	1	Frequent	Occasional	8							2	1	1		0
CS1	22	2	normal	normal	1	1	1	Med	4	>3	1	1	0		Never	0	Never	No	8							0	0	0		0
CS1	22	2	normal	normal	1	1	1	Med	3	3	0	1	0		Never	0	Never									0	0	0		0
CS1	23	2	normal	normal	1	2	1	Med	5	>3	0	0	1	10	Occasional	0	Frequent	Occasional								2	1	1		0
CS1	23	2	normal	normal	1	2	1	Med	5	>3	0	0	0		Occasional	0	Never	Occasional	17				0	2	0	0	0	0		0
CS1	23	2	underweight	maigreur	1	2	1	Med	4	>3	0	0	0		Occasional	0	Occasional	No	16							0	0	0		0
CS1	23	1	normal	normal	2	2	1	Med	3	3	0	0	0		Occasional	0	Occasional	No	11							0	0	0		0
CS1	23	1	normal	normal	1	2	1	Med	5	>3	0	1	0		Occasional	0	Occasional	Regular	1							0	0	0		0
CS1	23	1	normal	normal	2	1	1	Med	4	>3	0	0	0		Occasional	0	Occasional		15							0	0	0		0
CS1	23	2	overweight	overweight	1	2	1	Med	4	>3	1	0	0		Occasional	1	Occasional	Occasional	10							1	0	0		1
CS1	23	2	normal	normal	2	2	1	Med	5	>3	0	0	0		Frequent	1	Frequent	Occasional	8				0		0	1	0	1		0
CS1	24	2	normal	normal	2	1	1	Med	5	>3	0	0	0		Occasional	0	Never	No	22							0	0	0		0
CS1	24	1	normal	normal	2	2	1	Med	4	>3	1	0	0		Occasional	0	Occasional	No	10							0	0	0		0
CS1	25	2	normal	normal	2	3	1	Med	4	>3	1	1	0		Occasional	0	Never	No	9							0	0	0		0
CS1	25	2	normal	normal	1	2	1	Med	4	>3	0	0	0		Occasional	0	Occasional	No	29							0	0	0		0
CS2	18	2	normal	normal	1	2	1	Med	2	2	0	0	0		Frequent	1	Frequent	No	8	1	2	2	0	2	0	1	0	1	0	0
CS2	18	1	normal	normal	1	1	1	Med	2	2	0	1	0		Never	0	Never	No	6	1	3	3	0	2	0	0	0	0	0	0
CS2	19	1	normal	normal	1	3	1	Med	2	2	1	1	0		Occasional	0	Never	No	4	1	3	3	0	1	0	0	0	0	0	0
CS2	19	1	underweight	maigreur	1	1	1	Med	2	2	0	0	0		Occasional	0	Never	No	23	1	2	1	0	2	0	0	0	0	0	0
CS2	19	1	normal	normal	2	2	1	Med	2	2	0	0	0		Occasional	0	Never	No	18	1	1	1	0	2	1	0	0	0	0	0
CS2	19	2	normal	normal	1	1	1	Med	2	2	0	0	0		Occasional	0	Never	No	14	1	2	2	0	2	0	0	0	0	0	0
CS2	19	1	normal	normal	1	1	1	Med	3	3	0	0	0		Occasional	0	Occasional	No	10	1	1	2	0	2	0	0	0	0	0	0
CS2	19	2	normal	normal	2	3	1	Med	2	2	0	0	0		Occasional	0	Occasional	No	25	1	2	2	0	2	0	0	0	0	0	0
CS2	19	2	normal	normal	1	2	1	Med	3	3	0	0	0		Occasional	0	Occasional	No	14	1	2	3	1	2	1	0	0	0	0	0
CS2	19	2			1	2	1	Med	2	2	0	1	0		Occasional	0	Occasional	No	9	1	3	3	0	2	0	0	0	0	0
CS2	19	2	normal	normal	2	2	1	Med	2	2	1	1	0		Occasional	0	Occasional	Occasional	3	1	1	3	0	2	0	0	0	0	0	0
CS2	19	1	normal	normal	1	1	1	Med	2	2	0	0	0		Occasional	0	Occasional	Occasional	10	1	2	2	0	1	0	0	0	0	0	0
CS2	19	2	normal	normal	1	1	1	Med	2	2	0	1	0		Occasional	1	Never	No	14	1	3	2	1	2	0	0	0	0	0	0
CS2	19	2	underweight	maigreur	1	3	1	Med	2	2	0	0	0		Occasional	1	Occasional	No	17	1	2	2	0	2	0	0	0	0	0	0
CS2	19	2	normal	normal	1	2	1	Med	2	2	0	1	0		Occasional	1	Occasional	No	5	1	2	3	0	1	0	0	0	0	0	0
CS2	19	2	normal	normal	1	1	1	Med	2	2	0	0	0		Occasional	1	Occasional	No	10	1	2	2	0	2	0	0	0	0	0	0
CS2	19	2	normal	normal	1	2	1	Med	2	2	0	0	0		Occasional	1	Occasional	Occasional	10	1	1	3	0	1	0	0	0	0	0	0
CS2	19	2	normal	normal	1	3	1	Med	2	2	0	0	0		Occasional	1	Occasional	Occasional	7	1	2	1	0	2	0	0	0	0	0	0
CS2	19	1	normal	normal	1	1	1	Med	2	2	0	0	0		Occasional	1	Occasional	Occasional	1	1	2	3	0	1	0	0	0	0	0	0
CS2	19	1			1	2	1	Med	2	2	0	0	0		Frequent		Never	No	4	1	3	3	0	2	0	1	0	1	0
CS2	19	2	normal	normal	1	2	1	Med	2	2	0	1	1	2	Occasional	0	Occasional	Occasional	17	1	1	2	1	2	1	1	1	0	0	0
CS2	19	2	normal	normal	1	3	1	Med	2	2	0	0	0		Occasional	1	Frequent	No	18	1	3	2	0	1	1	1	0	1	0	0
CS2	19	2	normal	normal	2	1	1	Med	2	2	1	0	0		Occasional	1	Frequent	Occasional	6	1	1	2	0	2	0	1	0	1	0	0
CS2	19	2	normal	normal	1	2	1	Med	2	2	0	0	1	20	Occasional	1	Occasional	No	27	1	1	1	1	2	1	1	1	0	0	0
CS2	19	1	normal	normal	1	2	1	Med	2	2	0	0	0		Frequent	0	Frequent	No	1	1	>3	2	0	2	0	1	0	1	0	0
CS2	19	1	normal	normal	2	2	1	Med	2	2	0	0	0		Frequent	0	Frequent	Occasional	3	1	>3	2	0	2	0	1	0	1	0	0
CS2	19	2	normal	normal	2	1	1	Med	2	2	0	0	0		Frequent	0	Occasional	No	4	1	1	3	0	1	0	1	0	1	0	0
CS2	19	2	normal	normal	1	1	1	Med	2	2	1	0	0		Frequent	0	Occasional	No	17	1	3	3	0	2	0	1	0	1	0	0
CS2	19	2	normal	normal	2	2	1	Med	2	2	0	0	0		Frequent	0	Occasional	No	16	1	3	2	0	2	0	1	0	1	0	0
CS2	19	1	normal	normal	1	2	1	Med	2	2	0	0	0		Frequent	1	Frequent	No	5	1	1	3	0	2	0	1	0	1	0	0
CS2	19	2	normal	normal	1	1	1	Med	2	2	0	0	0		Frequent	1	Frequent	No	9	1	2	2	0	2	1	1	0	1	0	0
CS2	19	1	normal	normal	1	2	1	Med	2	2	0	1	0		Frequent	1	Frequent	No	17	1	>3	3	0	2	1	1	0	1	0	0
CS2	19	1	normal	normal	1	2	1	Med	2	2	1	0	0		Frequent	1	Frequent	No	11	1	>3	2	0	2	0	1	0	1	0	0
CS2	19	2	normal	normal	2	2	1	Med	2	2	1	1	0		Frequent	1	Frequent	Occasional	22	1	2	2	1	3	1	1	0	1	0	0
CS2	19	2	normal	normal	2	2	1	Med	2	2	1	1	0		Frequent	1	Frequent	Regular	11	1	>3	3	0	2	0	1	0	1	0	0
CS2	19	1	overweight	overweight	1	3	1	Med	2	2	1	0	0		Occasional	0	Frequent	No	9	1	>3	2	1	2	0	2	0	1	0	1
CS2	19	1	overweight	overweight	1	1	1	Med	2	2	0	1	0		Frequent	0	Frequent	Regular	29	1	>3	3	1	2	1	2	0	1	0	1
CS2	19	1	normal	normal	1	2	1	Med	2	2	0	0	1	5	Frequent	0	Frequent	Regular	8	1	3	2	0	2	0	2	1	1	0	0
CS2	19	2	normal	normal	1	2	1	Med	2	2	0	0	1	4	Frequent	0	Frequent	Regular	11	1	3	3	1	2	1	2	1	1	0	0
CS2	19	1	normal	normal	1	2	1	Med	2	2	0	0	1	10	Frequent	0	Occasional	Occasional	6	1	2	2	1	2	0	2	1	1	0	0
CS2	19	1	overweight	overweight	1	2	1	Med	2	2	0	0	1	10	Frequent	0	Occasional	Occasional	14	1	3	3	1	2	0	3	1	1	0	1
CS2	19	1	normal	normal	2	2	1	Med	2	2	1	1	0		Never	0	Never	No	21	1	2	2	0	2	1	0	0	0	0	0
CS2	19	2	normal	normal	2	1	1	Med	2	2	0	1	0		Never	0	Never	No	0	1	>3	2	0	2	0	0	0	0	0	0
CS2	20	1	normal	normal	1	1	1	Med	2	2	0	0	0		Occasional	0	Never	No	0	1	3	3	0	1	0	0	0	0	0	0
CS2	20	1	normal	normal	1	2	1	Med	3	3	1	0	0		Occasional	0	Never	No	2	1	3	2	0	1	0	0	0	0	0	0
CS2	20	2	normal	normal	2	2	1	Med	2	2	1	1	0		Occasional	0	Occasional	Occasional	21	1	3	1	0	2	1	0	0	0	0	0
CS2	20	2	normal	normal	1	2	1	Med	2	2	1	1	0		Frequent	0	Frequent	No	36	1	3	3	1	3	1	1	0	1	0	0
CS2	20	2	normal	normal	1	1	1	Med	3	3	0	0	0		Frequent	0	Occasional	Occasional	5	1	2	2	0	2	0	1	0	1	0	0
CS2	20	2	normal	normal	2	1	1	Med	3	3	0	0	0		Frequent	1	Occasional	Occasional	18	1	3	2	0	2	0	1	0	1	0	0
CS2	20	1	normal	normal	2	1	1	Med	3	3	0	0	1	5	Frequent	0	Occasional	Occasional	10	1	1	3	0	2	0	2	1	1	0	0
CS2	20	1	overweight	overweight	1	1	1	Med	3	3	0	0	0		Frequent	1	Frequent	Occasional	8	1	2	3	1	2	0	2	0	1	0	1
CS2	20	1	normal	normal	1	2	1	Med	3	3	0	0	1	1	Frequent	1	Occasional	No	13	1	3	3	0	2	0	2	1	1	0	0
CS2	20	2	underweight	maigreur	1	2	1	Med	2	2	0	1	0		Occasional	0	Never	No	7	1	2	2	0	1	0	0	0	0	0	0
CS2	20	2	underweight	maigreur	1	2	1	Med	2	2	0	0	0		Occasional	0	Never	No	18	1	>3	2	1	1	0	0	0	0	0	0
CS2	20	1	normal	normal	1	2	1	Med	3	3	0	0	0		Occasional	0	Never	No	12	1	1	2	0	2	0	0	0	0	0	0
CS2	20	1	normal	normal	1	2	1	Med	3	3	0	0	0		Occasional	0	Never	No	5	1	1	3	0	2	0	0	0	0	0	0
CS2	20	2	normal	normal	2	2	1	Med	2	2	0	0	0		Occasional	0	Never	No	9	1	1	2	0	2	0	0	0	0	0	0
CS2	20	1	normal	normal	2	2	1	Med	3	3	0	0	0		Occasional	0	Never	No	8	1	1	2	0	2	0	0	0	0	0	0
CS2	20	1	normal	normal	2	2	1	Med	2	2	0	1	0		Occasional	0	Never	No	14	1	2	2	0	2	0	0	0	0	0	0
CS2	20	2	normal	normal	2	2	1	Med	2	2	0	1	0		Occasional	0	Never	No	9	1	2	2	0	2	0	0	0	0	0	0
CS2	20	2	normal	normal	1	2	1	Med	2	2	0	1	0		Occasional	0	Never	No	7	1	3	2	0	2	1	0	0	0	0	0
CS2	20	2	normal	normal	2	1	1	Med	2	2	0	0	0		Occasional	0	Never	No	20	1	3	3	1	2	1	0	0	0	0	0
CS2	20	2	normal	normal	2	1	1	Med	3	3	0	0	0		Occasional	0	Never	No	7	1	>3	3	0	1	0	0	0	0	0	0
CS2	20	2	underweight	maigreur	2	2	1	Med	3	3	0	0	0		Occasional	0	Occasional	No	7	1	1	2	0	2	0	0	0	0	0	0
CS2	20	2	normal	normal		1	1	Med	2	2	0	0	0		Occasional	0	Occasional	No	32	1	1	3	0	2	0	0	0	0	0	0
CS2	20	2	normal	normal	1	1	1	Med	3	3	1	0	0		Occasional	0	Occasional	No	20	1	1	2	0	2	0	0	0	0	0	0
CS2	20	1	normal	normal	1	2	1	Med	2	2	0	1	0		Occasional	0	Occasional	No	21	1	1	3	0	2	1	0	0	0	0	0
CS2	20	1	normal	normal	1	2	1	Med	2	2	0	0	0		Occasional	0	Occasional	No	0	1	2	3	0	1	0	0	0	0	0	0
CS2	20	1	normal	normal	2	2	1	Med	2	2	0	0	0		Occasional	0	Occasional	No	9	1	2	3	0	2	0	0	0	0	0	0
CS2	20	1	normal	normal	2	2	1	Med	2	2	0	1	0		Occasional	0	Occasional	No	7	1	2	2	0	1	0	0	0	0	0	0
CS2	20	2	normal	normal	1	1	1	Med	2	2	0	0	0		Occasional	0	Occasional	No	8	1	2	2	0	2	0	0	0	0	0	0
CS2	20	2	normal	normal	1	2	1	Med	3	3	0	0	0		Occasional	0	Occasional	No	7	1	2	2	0	2	0	0	0	0	0	0
CS2	20	2	normal	normal	1	2	1	Med	3	3	0	0	0		Occasional	0	Occasional	No	11	1	2	3	0	1	0	0	0	0	0	0
CS2	20	2	normal	normal	2	1	1	Med	3	3	0	1	0		Occasional	0	Occasional	No	25	1	2	2	0	2	1	0	0	0	0	0
CS2	20	2	normal	normal	1	2	1	Med	3	3	0	1	0		Occasional	0	Occasional	No	16	1	2	2	0	2	0	0	0	0	0	0
CS2	20	1	normal	normal	2	2	1	Med	3	3	0	0	0		Occasional	0	Occasional	No	9	1	2	3	1	1	0	0	0	0	0	0
CS2	20	1	normal	normal	1	1	1	Med	3	3	1	1	0		Occasional	0	Occasional	No	14	1	2	2	0	1	0	0	0	0	0	0
CS2	20	2	normal	normal	2	2	1	Med	2	2	0	0	0		Occasional	0	Occasional	No	17	1	2	2	1	2	0	0	0	0	0	0
CS2	20	1	normal	normal	1	2	1	Med	2	2	0	0	0		Occasional	0	Occasional	No	10	1	3	3	0	2	0	0	0	0	0	0
CS2	20	2	normal	normal	2	2	1	Med	2	2	0	1	0		Occasional	0	Occasional	No	13	1	3	2	0	2	1	0	0	0	0	0
CS2	20	2			2	1	1	Med	2	2	0	1	0		Occasional	0	Occasional	No	18	1	3	3	1	2	0	0	0	0	0
CS2	20	2	normal	normal	1	1	1	Med	3	3	1	0	0		Occasional	0	Occasional	Occasional	12	1	1	1	1	1	0	0	0	0	0	0
CS2	20	1	normal	normal	1	2	1	Med	3	3	1	0	0		Occasional	0	Occasional	Occasional	8	1	2	3	0	2	0	0	0	0	0	0
CS2	20	1	normal	normal	1	2	1	Med	2	2	0	0	0		Occasional	0	Occasional	Occasional	4	1	3	1	0	2	0	0	0	0	0	0
CS2	20	1	normal	normal	1	2	1	Med	4	>3	0	1	0		Occasional	0	Occasional	Occasional	11	1	>3	3	0	2	0	0	0	0	0	0
CS2	20	2	underweight	maigreur	2	1	1	Med	2	2	0	0	0		Occasional	1	Occasional	No	16	1	1	3	0	2	1	0	0	0	0	0
CS2	20	2	normal	normal	2	2	1	Med	2	2	1	0	0		Occasional	1	Occasional	No	11	1	1	2	0	2	0	0	0	0	0	0
CS2	20	2	normal	normal	1	2	1	Med	3	3	0	1	0		Occasional	1	Occasional	No	6	1	1	3	0	2	0	0	0	0	0	0
CS2	20	1	normal	normal	1	2	1	Med	2	2	0	0	0		Occasional	1	Occasional	No	0	1	1	3	0	3	0	0	0	0	0	0
CS2	20	2	normal	normal	1	2	1	Med	2	2			0		Occasional	1	Occasional	No	9	1	1	3	1	2	0	0	0	0	0	0
CS2	20	2	normal	normal	2	2	1	Med	2	2	0	0	0		Occasional	1	Occasional	No	16	1	2	1	0	2	0	0	0	0	0	0
CS2	20	2	normal	normal	2	1	1	Med	3	3	0	0	0		Occasional	1	Occasional	No	2	1	2	3	0	1	0	0	0	0	0	0
CS2	20	1	normal	normal	2	2	1	Med	3	3	0	0	0		Occasional	1	Occasional	No	5	1	3	3		1	0	0	0	0	0	0
CS2	20	1	normal	normal	2	2	1	Med	2	2	1	1	0		Occasional	1	Occasional	No	6	1	3	3	0	1	0	0	0	0	0	0
CS2	20	2	normal	normal	1	2	1	Med	2	2	0	0	0		Occasional	1	Occasional	No	17	1	3	3	1	2	0	0	0	0	0	0
CS2	20	2	underweight	maigreur	2	2	1	Med	2	2	0	0	0		Occasional	1	Occasional	Occasional	18	1	1	3	0	2	1	0	0	0	0	0
CS2	20	1	normal	normal	2	3	1	Med	3	3	1	1	0		Occasional	1	Occasional	Occasional	8	1	1	2	0	1	0	0	0	0	0	0
CS2	20	2	normal	normal	1	2	1	Med	2	2	0	0	0		Occasional	1	Occasional	Occasional	7	1	>3	3	1	2	0	0	0	0	0	0
CS2	20	1			2	1	1	Med	3	3	1	0	0		Occasional	1	Occasional	Occasional	11	1	3	3	0	1	0	0	0	0	0
CS2	20	1	overweight	overweight	1	1	1	Med	3	3	0	0	0		Occasional	0	Occasional	No	13	1	1	3	0	1	0	1	0	0	0	1
CS2	20	1	overweight	overweight	2	2	1	Med	3	3	0	1	0		Occasional	0	Occasional	No	6	1	1	2	0	2	0	1	0	0	0	1
CS2	20	1			1	2	1	Med	3	3	0	0	1	1	Occasional	0	Occasional	No	8	1	3	3	0	1	0	1	1	0	0
CS2	20	2	normal	normal	1	2	1	Med	2	2	0	0	1	4	Occasional	0	Occasional	Occasional	23	1	2	2	0	2	1	1	1	0	0	0
CS2	20	2	normal	normal	2	2	1	Med	4	>3	1	0	1	1	Occasional	0	Occasional	Occasional	24	1	3	2	1	2	0	1	1	0	0	0
CS2	20	1	normal	normal	1	2	1	Med	2	2	0	0	0		Occasional	1	Frequent	No	14	1	2	3	0	2	0	1	0	1	0	0
CS2	20	1	normal	normal	1	2	1	Med	3	3	0	0	0		Occasional	1	Frequent	No	20	1	2	2	0	2	0	1	0	1	0	0
CS2	20	1	normal	normal	2	2	1	Med	3	3	0	1	0		Occasional	1	Frequent	No	14	1	3	3	0	2	0	1	0	1	0	0
CS2	20	1	normal	normal	2	2	1	Med	2	2	0	0	0		Occasional	1	Frequent	No	3	1	3	3	0	1	0	1	0	1	0	0
CS2	20	2	underweight	maigreur	2	2	1	Med	3	3	1	0	0		Occasional	1	Frequent	Occasional	10	1	2	1	0	1	0	1	0	1	0	0
CS2	20	1	normal	normal	1	2	1	Med	3	3	0	1	0		Occasional	1	Frequent	Occasional	6	1	1	2	0	2	0	1	0	1	0	0
CS2	20	1	overweight	overweight	1	2	1	Med	2	2	0	0	0		Occasional	1	Occasional	No	20	1	1	2	0	2	0	1	0	0	0	1
CS2	20	2	underweight	maigreur	1	2	1	Med	3	3	1	0	1	1	Occasional	1	Occasional	No	25	1	2	1	0	2	1	1	1	0	0	0
CS2	20	2	normal	normal	2	2	1	Med	3	3	0	0	1	5	Occasional	1	Occasional	No	10	1	1	3	0	2	0	1	1	0	0	0
CS2	20	2	normal	normal	1	1	1	Med	3	3	1	1	1	2	Occasional	1	Occasional	No	15	1	2	1	1	2	0	1	1	0	0	0
CS2	20	2	normal	normal	2	1	1	Med	2	2	0	0	1	2	Occasional	1	Occasional	Occasional	17	1	2	2	1	2	0	1	1	0	0	0
CS2	20	1	normal	normal	2	2	1	Med	2	2	0	0	1	6	Occasional	1	Occasional	Occasional	6	1	3	2	1	2	0	1	1	0	0	0
CS2	20	1	normal	normal	1	2	1	Med	2	2	0	0	0		Frequent	0	Frequent	Occasional	16	1	1	2	1	2	1	1	0	1	0	0
CS2	20	2			2	2	1	Med	2	2	0	1	0		Frequent	0	Frequent	Occasional	3	1	2	2	1	1	1	1	0	1	0
CS2	20	1	normal	normal	1	2	1	Med	3	3			0		Frequent	0	Never	Occasional	2	1	>3	2	0	1	0	1	0	1	0	0
CS2	20	2	normal	normal	1	2	1	Med	2	2	0	0	1	4	Frequent	0	Never	Occasional	16	1	1	2	0	2	0	2	1	1	0	0
CS2	20	2	normal	normal	2	2	1	Med	2	2	0	0	0		Frequent	0	Occasional	No	9	1	1	3	0	2	1	1	0	1	0	0
CS2	20	2	normal	normal	2	3	1	Med	2	2	0	1	0		Frequent	0	Occasional	No	8	1	1	2	0	1	0	1	0	1	0	0
CS2	20	1	normal	normal	1	1	1	Med	3	3	1	0	0		Frequent	0	Occasional	No	11	1	2	3	1	2	0	1	0	1	0	0
CS2	20	2	normal	normal	2	2	1	Med	3	3	0	0	0		Frequent	0	Occasional	No	21	1	3	2	0	2	0	1	0	1	0	0
CS2	20	1	normal	normal	2	2	1	Med	3	3	1	1	0		Frequent	0	Occasional	No	13	1	>3	2	0	2	0	1	0	1	0	0
CS2	20	2			2	2	1	Med	2	2	0	0	0		Frequent	0	Occasional	No	27	1	>3	2	1	2	0	1	0	1	0
CS2	20	1	normal	normal	1	2	1	Med	2	2	0	0	0		Frequent	0	Occasional	Occasional	6	1	1	3	0	1	0	1	0	1	0	0
CS2	20	2	normal	normal	2	2	1	Med	2	2	0	0	0		Frequent	0	Occasional	Occasional	9	1	1	1	0	2	1	1	0	1	0	0
CS2	20	2	normal	normal	2	2	1	Med	2	2	0	1	0		Frequent	0	Occasional	Occasional	11	1	3	3	0	2	0	1	0	1	0	0
CS2	20	2	normal	normal	1	2	1	Med	2	2	1	0	0		Frequent	0	Occasional	Occasional	19	1	3	3	0	1	0	1	0	1	0	0
CS2	20	2	normal	normal	1	2	1	Med	2	2	1	0	0		Frequent	0	Occasional	Occasional	20	1	>3	3	0	3	1	1	0	1	0	0
CS2	20	2	normal	normal	1	2	1	Med	2	2	0	0	0		Frequent	1	Frequent	No	1	1	2	2	0	3	0	1	0	1	0	0
CS2	20	1	normal	normal	2	2	1	Med	2	2	0	0	0		Frequent	1	Frequent	No	2	1	3	3	0	1	0	1	0	1	0	0
CS2	20	2	normal	normal	2	2	1	Med	2	2	1	0	0		Frequent	1	Frequent	Occasional	17	1	1	2	0	2	1	1	0	1	0	0
CS2	20	2	normal	normal	1	2	1	Med	2	2	1	0	0	1	Frequent	1	Frequent	Occasional	12	1	1	3	1	2	1	1	0	1	0	0
CS2	20	1	normal	normal	1	2	1	Med	2	2	1	0	0		Frequent	1	Frequent	Occasional	9	1	2	3	0	1	0	1	0	1	0	0
CS2	20	2	normal	normal	1	3	1	Med	2	2	0	1	0		Frequent	1	Frequent	Occasional	3	1	2	3	1	1	0	1	0	1	0	0
CS2	20	1	normal	normal	2	2	1	Med	2	2	1	0	0		Frequent	1	Frequent	Occasional	10	1	>3	3	0	1	0	1	0	1	0	0
CS2	20	1			1	1	1	Med	2	2	0	0	1	2	Frequent	1	Never	Occasional	5	1	1	2	0	2	0	2	1	1	0
CS2	20	2	normal	normal	1	1	1	Med	2	2	0	0	0		Frequent	1	Occasional	Occasional	19	1	1	3	1	2	1	1	0	1	0	0
CS2	20	1	overweight	overweight	1	3	1	Med	2	2	0	0	0				Occasional	Occasional	2	1	>3	3	0	1	1	1	0	0	0	1
CS2	20	1	underweight	maigreur	2	2	1	Med	3	3	0	0	1	10	Occasional	0	Frequent	Regular	23	1	1	1	0	2	0	2	1	1	0	0
CS2	20	1	normal	normal	2	2	1	Med	3	3	1	0	1	7	Occasional	0	Frequent	Occasional	12	1	2	3	0	3	0	2	1	1	0	0
CS2	20	2	normal	normal	1	1	1	Med	3	3	1	0	1	4	Occasional	0	Frequent	Occasional	21	1	>3	3	1	2	0	2	1	1	0	0
CS2	20	2	overweight	overweight	1	2	1	Med	3	3	1	0	1	5	Occasional	1	Occasional	No	15	1	>3	2	0	2	1	2	1	0	0	1
CS2	20	2	underweight	maigreur		2	1	Med	2	2	0	0	1	10	Frequent	0	Frequent	Occasional	15	1	1	2	0	2	1	2	1	1	0	0
CS2	20	2	normal	normal	1	2	1	Med	3	3	1	0	1	10	Frequent	0	Frequent	Occasional	8	1	1	2	0	2	0	2	1	1	0	0
CS2	20	2	normal	normal	2	2	1	Med	3	3	0	0	1	5	Frequent	0	Frequent	Occasional	12	1	3	2	0	2	0	2	1	1	0	0
CS2	20	1	normal	normal	1	2	1	Med	2	2	1	0	1	8	Frequent	0	Frequent	Regular	8	1	>3	3	0	2	0	2	1	1	0	0
CS2	20	2	normal	normal	2	1	1	Med	2	2	1	0	1	5	Frequent	0	Occasional	No	5	1	2	2	1	2	0	2	1	1	0	0
CS2	20	2			1	2	1	Med	2	2	0	0	1	2	Frequent	0	Occasional	Occasional	8	1	2	3	0	2	0	2	1	1	0
CS2	20	1	overweight	overweight	1	2	1	Med	2	2	0	0	0		Frequent	0	Occasional	Regular	4	1	1	2	0	2	0	2	0	1	0	1
CS2	20	1	normal	normal	2	1	1	Med	3	3	1	0	1	10	Frequent	1	Frequent	No	12	1	2	3	0	2	0	2	1	1	0	0
CS2	20	1	overweight	overweight	1	1	1	Med	3	3	0	0	0		Frequent	1	Frequent	Occasional	19	1	2	2	0	1	0	2	0	1	0	1
CS2	20	1	overweight	overweight	2	1	1	Med	3	3	0	0	0		Frequent	1	Frequent	Occasional	5	1	3	2	0	2	0	2	0	1	0	1
CS2	20	1	normal	normal		2	1	Med	2	2	0	0	1	10	Frequent	1	Frequent	Occasional	6	1	1	2	0	3	0	2	1	1	0	0
CS2	20	1	normal	normal	1	2	1	Med	3	3	0	0	1	8	Frequent	1	Frequent	Occasional	2	1	>3	3	0	2	0	2	1	1	0	0
CS2	20	1	normal	normal	1	1	1	Med	2	2	0	0	1	4	Frequent	1	Frequent	Occasional	12	1	>3	2	0	2	0	2	1	1	0	0
CS2	20	1	normal	normal	1	2	1	Med	3	3	0	1	1	3	Frequent	1	Frequent	Occasional	10	1	>3	3	1	1	0	2	1	1	0	0
CS2	20	2			1	2	1	Med	2	2	1	0	1	5	Frequent	1	Frequent	Occasional	11	1	>3	2	1	2	0	2	1	1	0
CS2	20	2	normal	normal	1	2	1	Med	2	2	1	0	1	6	Frequent	1	Occasional	No	21	1	1	3	1	2	1	2	1	1	0	0
CS2	20	2	normal	normal	1	1	1	Med	2	2	0	0	1	3	Frequent	1	Occasional	No	11	1	2	2	0	2	0	2	1	1	0	0
CS2	20	1	overweight	overweight		1	1	Med	2	2	1	0	1	20	Frequent	1	Frequent	Occasional	20	1	>3	1	1	2	1	3	1	1	0	1
CS2	20	1	overweight	overweight	2	2	1	Med	4	>3	0	0	1	10	Frequent	1	Occasional	Occasional	3	1	1	3	0	2	0	3	1	1	0	1
CS2	20	2	normal	normal	2	1	1	Med	2	2	1	1	0		Never	0	Never	No	18	1	1	2	0	1	0	0	0	0	0	0
CS2	20	2	normal	normal	2	1	1	Med	2	2	0	1	0		Never	0	Never	No	16	1	1	2	0	1	0	0	0	0	0	0
CS2	20	2	normal	normal	2	2	1	Med	3	3	0	0	0		Never	0	Never	No	3	1	1	1	0		0	0	0	0	0	0
CS2	20	1	normal	normal	2	2	1	Med	3	3	1	1	0		Never	0	Never	No	11	1	1	2	0	2	0	0	0	0	0	0
CS2	20	2	normal	normal	2	1	1	Med	2	2	0	0	0		Never	0	Never	No	17	1	2	2	0	1	0	0	0	0	0	0
CS2	20	2	normal	normal	2	2	1	Med	2	2	0	0	0		Never	0	Never	No	16	1	2	2	1	1	0	0	0	0	0	0
CS2	20	1	normal	normal	1	2	1	Med	3	3	0	0	0		Never	0	Never	No	10	1	>3	3	0	2	0	0	0	0	0	0
CS2	20	2	normal	normal	1	2	1	Med	2	2	0	1	0		Never	0	Never	No	19	1	>3	2	1	2	0	0	0	0	0	0
CS2	20	2			1	2	1	Med	2	2	1	0	0		Never	0	Never	No	18	1	>3	2	0	2	0	0	0	0	0
CS2	21	2	normal	normal	2	2	1	Med	4	>3	0	0	0		Occasional	0	Never	No	5	1	1	2	0	1	0	0	0	0	0	0
CS2	21	2	normal	normal	2	2	1	Med	3	3	1	0	0		Occasional	0	Never	No	19	1	2	2	0	1	0	0	0	0	0	0
CS2	21	2	normal	normal	1	2	1	Med	3	3	0	1	0		Occasional	0	Never	No	17	1	2	3	0	2	0	0	0	0	0	0
CS2	21	1	normal	normal	1	1	1	Med	2	2	0	0	0		Occasional	0	Never	No	8	1	>3	3	0	2	0	0	0	0	0	0
CS2	21	2	normal	normal	1	2	1	Med	3	3	0	0	0		Occasional	0	Never	No	12	1	>3	2	0	2	0	0	0	0	0	0
CS2	21	2	normal	normal	2	2	1	Med	4	>3	0	0	0		Occasional	0	Occasional	No	11	1	3	2	0	2	0	0	0	0	0	0
CS2	21	2	normal	normal	2	2	1	Med	4	>3	0	0	1	15	Occasional	0	Occasional	No	24	1	2	2	0	2	0	1	1	0	0	0
CS2	21	2	underweight	maigreur	1	2	1	Med	3	3	0	0	0		Occasional	0	Never	No	20	1	1	2	1	2	1	0	0	0	0	0
CS2	21	2	normal	normal	2	2	1	Med	4	>3	0	1	0		Occasional	0	Never	No	19	1	1	3	0	2	0	0	0	0	0	0
CS2	21	2	normal	normal	2	1	1	Med	3	3	0	1	0		Occasional	0	Never	No	6	1	1	2	0	2	1	0	0	0	0	0
CS2	21	2	normal	normal	2	2	1	Med	3	3	0	0	0		Occasional	0	Never	No	5	1	1	2	1	2	1	0	0	0	0	0
CS2	21	2	normal	normal	1		1	Med	2	2	0	0	0		Occasional	0	Never	No	13	1	2	3	0	2	0	0	0	0	0	0
CS2	21	2	normal	normal	1	1	1	Med	3	3	1	1	0		Occasional	0	Never	No	11	1	2	2	0	2	0	0	0	0	0	0
CS2	21	2	normal	normal	2	2	1	Med	4	>3	0	0	0		Occasional	0	Never	No	15	1	2	3	0	2	0	0	0	0	0	0
CS2	21	1	normal	normal	1	2	1	Med	3	3	0	0	0		Occasional	0	Never	No	14	1	2	1	0	2	0	0	0	0	0	0
CS2	21	2	normal	normal	1	2	1	Med	2	2	0	0	0		Occasional	0	Never	No	19	1	2	2	0	2	0	0	0	0	0	0
CS2	21	2	normal	normal	1	2	1	Med	3	3	0	0	0		Occasional	0	Never	No	7	1	3	2	0	2	0	0	0	0	0	0
CS2	21	2	normal	normal	2	1	1	Med	3	3	0	0	0		Occasional	0	Never	No	7	1	3	3	0	1	0	0	0	0	0	0
CS2	21	1	normal	normal	1	1	1	Med	2	2	0	1	0		Occasional	0	Never	No	0	1	3	2	0	1	0	0	0	0	0	0
CS2	21	2	normal	normal	1	2	1	Med	4	>3	0	0	0		Occasional	0	Never	No	12	1	3	2	0	2	0	0	0	0	0	0
CS2	21	2			1	2	1	Med	3	3	1	1	0		Occasional	0	Never	No	19	1	2	3	1	3	0	0	0	0	0
CS2	21	2	underweight	maigreur	2	2	1	Med	3	3	0	0	0		Occasional	0	Occasional	No	12	1	1	1	0	2	1	0	0	0	0	0
CS2	21	2	underweight	maigreur	1	2	1	Med	4	>3	0	0	0		Occasional	0	Occasional	No	11	1	2	2	1	2	0	0	0	0	0	0
CS2	21	2	underweight	maigreur	1	1	1	Med	2	2		0	0		Occasional	0	Occasional	No	11	1	>3	1	0	2	0	0	0	0	0	0
CS2	21	1	normal	normal	1	1	1	Med	3	3	1	0	0		Occasional	0	Occasional	No	3	1	1	3	0	2	0	0	0	0	0	0
CS2	21	2	normal	normal	2	3	1	Med	3	3	1	1	0		Occasional	0	Occasional	No	26	1	1	2	0	2	1	0	0	0	0	0
CS2	21	2	normal	normal	2	2	1	Med	3	3	0	1	0		Occasional	0	Occasional	No	13	1	2	2	0	2	1	0	0	0	0	0
CS2	21	2	normal	normal	1	2	1	Med	4	>3	0	0	0		Occasional	0	Occasional	No	1	1	2	3	0	1	0	0	0	0	0	0
CS2	21	2	normal	normal	2	2	1	Med	4	>3	0	0	0		Occasional	0	Occasional	No	18	1	2	2	0	2	0	0	0	0	0	0
CS2	21	2	normal	normal	2	2	1	Med	3	3	1	0	0		Occasional	0	Occasional	No	18	1	3	2	1	2	0	0	0	0	0	0
CS2	21	2	underweight	maigreur	2	2	1	Med	3	3	0	0	0		Occasional	0	Occasional	Occasional	1	1	2	2	0	1	0	0	0	0	0	0
CS2	21	1	normal	normal	1	2	1	Med	3	3	0	0	0		Occasional	0	Occasional	Occasional	9	1	1	2	0	2	0	0	0	0	0	0
CS2	21	2	normal	normal	2	1	1	Med	3	3	1	0	0		Occasional	0	Occasional	Occasional	13	1	2	2	0	2	0	0	0	0	0	0
CS2	21	1	normal	normal	2	2	1	Med	4	>3	0	0	0		Occasional	0	Occasional	Occasional	10	1	2	3	0	2	0	0	0	0	0	0
CS2	21	1	normal	normal	2	2	1	Med	4	>3	0	0	0		Occasional	0	Occasional	Occasional	20	1	2	3	0	2	1	0	0	0	0	0
CS2	21	1	normal	normal	1	1	1	Med	2	2	1	0	0		Occasional	0	Occasional	Occasional	19	1	3	3	0	2	0	0	0	0	0	0
CS2	21	1	normal	normal	1	1	1	Med	4	>3	0	0	0		Occasional	0	Occasional	Occasional	6	1	3	2	0	1	0	0	0	0	0	0
CS2	21	1	normal	normal	2	2	1	Med	4	>3	0	1	0		Occasional	0	Occasional	Occasional	3	1	>3	2	0	1	0	0	0	0	0	0
CS2	21	2	normal	normal	2	1	1	Med	3	3	1	0	0		Occasional	0	Occasional	Occasional	8	1	>3	2	0	2	0	0	0	0	0	0
CS2	21	2	underweight	maigreur	2	2	1	Med	4	>3	0	0	0		Occasional	1	Never	No	22	1	1	2	1	2	0	0	0	0	0	0
CS2	21	2	normal	normal	2	2	1	Med	2	2	0	0	0		Occasional	1	Never	No	6	1	1	2	0	2	1	0	0	0	0	0
CS2	21	2	underweight	maigreur	2	1	1	Med	3	3	1	0	0		Occasional	1	Occasional	No	9	1	2	1	0	2	0	0	0	0	0	0
CS2	21	2	normal	normal	2	2	1	Med	4	>3	0	0	0		Occasional	1	Occasional	No	5	1	1	3	0	1	0	0	0	0	0	0
CS2	21	2	normal	normal	2	2	1	Med	3	3	0	1	0		Occasional	1	Occasional	No	24	1	1	3	0	2	0	0	0	0	0	0
CS2	21	2	normal	normal	1	2	1	Med	4	>3	0	1	0		Occasional	1	Occasional	No	4	1	1	3	0	1	0	0	0	0	0	0
CS2	21	2	normal	normal	2	2	1	Med	3	3	1	0	0		Occasional	1	Occasional	No	14	1	2	3	0	2	0	0	0	0	0	0
CS2	21	2	normal	normal	1	2	1	Med	3	3	0	0	0		Occasional	1	Occasional	No	18	1	2	2	0	2	0	0	0	0	0	0
CS2	21	2	normal	normal	1	2	1	Med	4	>3	0	1	0		Occasional	1	Occasional	No	16	1	2	1	1	2	0	0	0	0	0	0
CS2	21	1	normal	normal	1	2	1	Med	4	>3	0	1	0		Occasional	1	Occasional	No	10	1	3	2	0	1	0	0	0	0	0	0
CS2	21	2	normal	normal	1	1	1	Med	3	3	1	0	0		Occasional	1	Occasional	No	6	1	3	2	0	1	0	0	0	0	0	0
CS2	21	2	normal	normal	2	1	1	Med	3	3	0	0	0		Occasional	1	Occasional	No	15	1	3	2	0	2	1	0	0	0	0	0
CS2	21	2			1	2	1	Med	4	>3	0	0	0		Occasional	1	Occasional	No	10	1	2	2	0	2	0	0	0	0	0
CS2	21	2	normal	normal	1	2	1	Med	5	>3	0	0	0		Occasional	1	Occasional	Occasional	6	1	1	3	0	2	0	0	0	0	0	0
CS2	21	1	normal	normal	1	1	1	Med	4	>3	0	0	0		Occasional	1	Occasional	Occasional	9	1	2	2	0	1	0	0	0	0	0	0
CS2	21	2	normal	normal	1	2	1	Med	4	>3	0	0	0		Occasional	1	Occasional	Occasional	17	1	2	2	0	1	0	0	0	0	0	0
CS2	21	2	normal	normal	2	2	1	Med	4	>3	1	0	0		Occasional	1	Occasional	Occasional	15	1	3	2	0	1	1	0	0	0	0	0
CS2	21	2	normal	normal	2	3	1	Med	3	3	0	1	0		Occasional	1	Occasional	Occasional	21	1	>3	3	1	3	1	0	0	0	0	0
CS2	21	2	normal	normal	1	2	1	Med	3	3	0	0	0		Occasional	1	Occasional	Occasional	19	1	>3	2	0	2	0	0	0	0	0	0
CS2	21	2	normal	normal	2	2	1	Med	3	3	0	0	0		Frequent	0	Never	No	11	1	1	3	0	2	1	1	0	1	0	0
CS2	21	1	underweight	maigreur	1	2	1	Med	4	>3	0	1	0		Frequent	1	Never	No	15	1	1	2	0	1	0	1	0	1	0	0
CS2	21	2	underweight	maigreur	2	2	1	Med	3	3	0	0	1	7	Occasional	0	Never	No	16	1	3	2	1	3	0	1	1	0	0	0
CS2	21	2	normal	normal	2	2	1	Med	5	>3	0	0	1	2	Occasional	0	Occasional	No	17	1	1	3	0	2	1	1	1	0	0	0
CS2	21	2	normal	normal	2	2	1	Med	2	2	1	0	1	7	Occasional	0	Occasional	No	9	1	3	3	0	2	0	1	1	0	0	0
CS2	21	1	overweight	overweight	1	2	1	Med	3	3	0	1	0		Occasional	0	Occasional	Occasional	12	1	2	2		2	0	1	0	0	0	1
CS2	21	2	underweight	maigreur	2	1	1	Med	2	2	0	0	1	0.1	Occasional	0	Occasional	Occasional	10	1	1	2	0	1	1	1	1	0	0	0
CS2	21	2	normal	normal	1	2	1	Med	2	2	1	0	1	5	Occasional	0	Occasional	Occasional	17	1	1	3		2	0	1	1	0	0	0
CS2	21	1	normal	normal	2	2	1	Med	3	3	0	0	1	1	Occasional	0	Occasional	Occasional	14	1	1	2	0	2	0	1	1	0	0	0
CS2	21	2	normal	normal	1	2	1	Med	4	>3	0	0	1	2	Occasional	0	Occasional	Occasional	17	1	2	2	1	2	0	1	1	0	0	0
CS2	21	2	normal	normal	1	2	1	Med	4	>3	0	0	1	8	Occasional	0	Occasional	Occasional	13	1	2	2	0	3	0	1	1	0	0	0
CS2	21	2	underweight	maigreur	1	2	1	Med	3	3	1	1	0		Occasional	1	Frequent	No	13	1	1	1	0	2	0	1	0	1	0	0
CS2	21	2	normal	normal	2	1	1	Med	3	3	1	0	0		Occasional	1	Frequent	No	8	1	2	2	1	1	0	1	0	1	0	0
CS2	21	1	overweight	overweight	2	2	1	Med	3	3	0	1	0		Occasional	1	Occasional	No	8	1	1	2	0	2	0	1	0	0	0	1
CS2	21	2	overweight	overweight	1	2	1	Med	4	>3	0	1	0		Occasional	1	Occasional	No	10	1	2	2	0	2	0	1	0	0	0	1
CS2	21	2	normal	normal	2	2	1	Med	4	>3	0	1	1	1	Occasional	1	Occasional	Occasional	18	1	1	3	1	2	1	1	1	0	0	0
CS2	21	2	normal	normal	1	2	1	Med	4	>3	0	0	1	7	Occasional	1	Occasional	Occasional	14	1	3	3	0	2	0	1	1	0	0	0
CS2	21	2	normal	normal	2	2	1	Med	4	>3	1	0	1	5	Occasional	1	Occasional	Regular	29	1	3	2	0	2	0	1	1	0	0	0
CS2	21	2	normal	normal	2	2	1	Med	3	3	1	0	0		Frequent	0	Frequent	No	15	1	1	2	0	2	0	1	0	1	0	0
CS2	21	2	normal	normal	2	2	1	Med	2	2	0	0	0		Frequent	0	Frequent	No	26	1	2	3	0	2	1	1	0	1	0	0
CS2	21	2	normal	normal	2	2	1	Med	3	3	1	0	0		Frequent	0	Frequent	Occasional	20	1	>3	2	1	1	1	1	0	1	0	0
CS2	21	2	normal	normal	2	2	1	Med	4	>3	0	0	0		Frequent	0	Occasional	No	5	1	1	2	0	1	0	1	0	1	0	0
CS2	21	1	normal	normal	2	2	1	Med	4	>3	0	0	0		Frequent	0	Occasional	No	6	1	1	2	0	2	0	1	0	1	0	0
CS2	21	1	normal	normal	2	1	1	Med	3	3	1	1	0		Frequent	0	Occasional	No	14	1	2	2	0	2	0	1	0	1	0	0
CS2	21	1	normal	normal	2	1	1	Med	3	3	0	0	0		Frequent	0	Occasional	No	4	1	2	2	0	1	0	1	0	1	0	0
CS2	21	1	normal	normal	1	2	1	Med	4	>3	0	0	0		Frequent	0	Occasional	No	10	1	3	3	0	2	0	1	0	1	0	0
CS2	21	2	normal	normal	1	2	1	Med	4	>3	0	0	0		Frequent	0	Occasional	No	19	1	3	2	0	2	0	1	0	1	0	0
CS2	21	1	normal	normal	2	1	1	Med	3	3	1	0	0		Frequent	0	Occasional	No	12	1	3	3	0	2	0	1	0	1	0	0
CS2	21	1	normal	normal	1	2	1	Med	4	>3	0	0	0		Frequent	0	Occasional	Occasional	25	1	1	2	0	2	0	1	0	1	0	0
CS2	21	1	normal	normal	2	2	1	Med	3	3	0	0	0		Frequent	1	Frequent	No	10	1	2	2	0	2	0	1	0	1	0	0
CS2	21	1	normal	normal	2	2	1	Med	2	2	0	0	0		Frequent	1	Frequent	No	9	1	2	2	0	2	0	1	0	1	0	0
CS2	21	1	normal	normal	2	2	1	Med	4	>3	1	0	0		Frequent	1	Frequent	Occasional	6	1	2	2	0	2	0	1	0	1	0	0
CS2	21	2	normal	normal	1	2	1	Med	4	>3	0	1	0	3	Frequent	1	Frequent	Occasional	8	1	2	2	0	2	0	1	0	1	0	0
CS2	21	1	normal	normal	1	2	1	Med	4	>3	0	0	0		Frequent	1	Frequent	Occasional	13	1	>3	3	0	2	0	1	0	1	0	0
CS2	21	2	normal	normal	1	2	1	Med	4	>3	0	0	0		Frequent	1	Frequent	Occasional	16	1	>3	2	1	2	0	1	0	1	0	0
CS2	21	1	normal	normal	1	2	1	Med	4	>3	1	0	1	10	Frequent	1	Never	Occasional	14	1	>3	2	0	1	0	2	1	1	0	0
CS2	21	2	normal	normal	1	2	1	Med	3	3	0	0	0		Frequent	1	Occasional	No	16	1	>3	3	0	2	1	1	0	1	0	0
CS2	21	1	normal	normal	1	1	1	Med	4	>3	1	0	0		Frequent	1	Occasional	Occasional	10	1	1	2	0	2	0	1	0	1	0	0
CS2	21	1	normal	normal	2	2	1	Med	3	3	0	1	0		Frequent	1	Occasional	Occasional	9	1	>3	3	0	1	0	1	0	1	0	0
CS2	21	2	normal	normal	2	2	1	Med	4	>3	0	0	0				Occasional	No	23	1	2	2	1	2	0	1	0	1	0	0
CS2	21	2	normal	normal	1	2	1	Med	4	>3	0	0	0				Occasional	No	13	1	3	2	1	2	0	1	0	1	0	0
CS2	21	2	overweight	overweight	2	1	1	Med	2	2	0	1	0		Occasional	0	Frequent	Occasional	22	1	3	3	1		0	2	0	1	0	1
CS2	21	1	overweight	overweight	2	2	1	Med	2	2	1	0	0		Occasional	1	Frequent	Occasional	12	1	3	3	1	2	0	2	0	1	0	1
CS2	21	1	normal	normal	1	2	1	Med	2	2	1	1	1	10	Occasional	1	Frequent	Occasional	6	1	2	3	0	1	0	2	1	1	0	0
CS2	21	1	overweight	overweight	2	2	1	Med	3	3	0	1	1	10	Occasional	1	Occasional	Occasional	6	1	>3	2	0	1	0	2	1	0	0	1
CS2	21	2	normal	normal	2	1	1	Med	3	3	1	0	1	10	Frequent	0	Frequent	Occasional	20	1	1	2	0	2	0	2	1	1	0	0
CS2	21	1	overweight	overweight	1	1	1	Med	3	3	1	1	0		Frequent	0	Occasional	No	13	1	1	2	0	2	1	2	0	1	0	1
CS2	21	1	normal	normal	1	2	1	Med	2	2	1	0	1	10	Frequent	0	Occasional	No	8	1	>3	3	0	1	1	2	1	1	0	0
CS2	21	2	normal	normal	2	2	1	Med	2	2	0	0	1	10	Frequent	0	Occasional	Occasional	1	1	2	2	0	2	0	2	1	1	0	0
CS2	21	2	normal	normal	2	2	1	Med	2	2	1	0	1	3	Frequent	0	Occasional	Occasional	28	1	2	3	0	2	1	2	1	1	0	0
CS2	21	1	overweight	overweight	2	1	1	Med	2	2	0	0	0		Frequent	1	Frequent	Occasional	14	1	>3	3	0	2	1	2	0	1	0	1
CS2	21	2	normal	normal	1	1	1	Med	2	2	0	0	1	2	Frequent	1	Frequent	Occasional	13	1	2	2	1	1	0	2	1	1	0	0
CS2	21	1	normal	normal	1	1	1	Med	4	>3	1	0	1	2	Frequent	1	Frequent	Occasional	9	1	2	3	0	1	0	2	1	1	0	0
CS2	21	2	normal	normal	1	2	1	Med	3	3	1	0	1	3	Frequent	1	Frequent	Occasional	13	1	2	2	0	2	0	2	1	1	0	0
CS2	21	1	normal	normal	1	2	1	Med	4	>3	0	0	1	5	Frequent	1	Frequent	Occasional	5	1	3	2	0	2	0	2	1	1	0	0
CS2	21	1	normal	normal	1	1	1	Med	2	2	0	1	1	1	Frequent	1	Frequent	Occasional	1	1	>3	3	1	1	0	2	1	1	0	0
CS2	21	1	normal	normal	2	2	1	Med	2	2	1	0	1	15	Frequent	1	Frequent	Regular	19	1	3	3	1	2	1	2	1	1	0	0
CS2	21	1	overweight	overweight	2	2	1	Med	4	>3	0	0	1	10	Frequent	0	Frequent	Occasional	1	1	3	3	0	1	0	3	1	1	0	1
CS2	21	2	normal	normal	2	2	1	Med	4	>3	1	1	0		Never	0	Never	No	21	1	1	2	1	2	0	0	0	0	0	0
CS2	21	2	normal	normal	2	1	1	Med	2	2	0	0	0		Never	0	Never	No	12	1	1	2	0	2	0	0	0	0	0	0
CS2	21	1	normal	normal	1	3	1	Med	3	3	1	1	0		Never	0	Never	No	9	1	>3	3	0	2	0	0	0	0	0	0
CS2	21	1	normal	normal	1	3	1	Med	2	2	0	1	0		Never	0	Never	No	2	1	>3	3	0	2	0	0	0	0	0	0
CS2	21	2	normal	normal	1	1	1	Med	3	3	0	0	0		Frequent	1	Never	No	16	1	1	2	0	2	0	1	0	1	0	0
CS2	21	2	normal	normal	1	2	1	Med	3	3	0	1	1		Occasional	1	Occasional	Occasional	14	1	2	2	0	2	1	1	1	0	0	0
CS2	21	1	overweight	overweight	1	2	1	Med	5	>3	0	0	0		Frequent	1	Never	No	12	1	3	3	0	2	0	2	0	1	0	1
CS2	22	1	normal	normal	1	2	1	Med	5	>3	1	0	0		Occasional	0	Never	No	5	1	3	2	0	1	0	0	0	0	0	0
CS2	22	2	normal	normal	1	1	1	Med	2	2	1	1	0		Occasional	0	Never	No	4	1	>3	2	1	1	0	0	0	0	0	0
CS2	22	1	normal	normal	2	1	1	Med	4	>3	0	0	0		Occasional	0	Occasional	No	10	1	2	2	0	2	0	0	0	0	0	0
CS2	22	1	normal	normal	1	1	1	Med	5	>3	0	0	0		Occasional	0	Occasional	No	16	1	>3	2	0	1	0	0	0	0	0	0
CS2	22	1	normal	normal	2	2	1	Med	3	3	0	0	0		Occasional	0	Occasional	No	23	1	>3	3	0	2	0	0	0	0	0	0
CS2	22	2	normal	normal	2	2	1	Med	4	>3	0	0	0		Occasional	0	Occasional	No	15	1	>3	2	0	2	0	0	0	0	0	0
CS2	22	1	normal	normal	1	2	1	Med	4	>3	0	0	0		Occasional	0	Occasional	Occasional	8	1	1	2	0	2	0	0	0	0	0	0
CS2	22	2	normal	normal	2	1	1	Med	4	>3	0	1	0		Occasional	1	Never	No	22	1	1	3	0	2	1	0	0	0	0	0
CS2	22	2	normal	normal	1	1	1	Med	4	>3	0	0	1	7	Occasional	1	Occasional	No	7	1	2	2		2	0	1	1	0	0	0
CS2	22	2	normal	normal	2	2	1	Med	4	>3	0	0	0		Frequent	0	Occasional	Occasional	8	1	1	2	0	2	0	1	0	1	0	0
CS2	22	2	underweight	maigreur	1	2	1	Med	2	2	1	1	0		Occasional	0	Never	No	10	1	>3	3	0	1	0	0	0	0	0	0
CS2	22	2	normal	normal	2	2	1	Med	4	>3	1	0	0		Occasional	0	Never	No	21	1	1	2	0	2	0	0	0	0	0	0
CS2	22	2	normal	normal	2	2	1	Med	4	>3	0	0	0		Occasional	0	Never	No	15	1	1	2	0	2	1	0	0	0	0	0
CS2	22	2	normal	normal	1	2	1	Med	5	>3	0	0	0		Occasional	0	Never	No	21	1	1	3	0	2	0	0	0	0	0	0
CS2	22	2	normal	normal	1	1	1	Med	3	3	0	0	0		Occasional	0	Never	No	3	1	1	3		1	0	0	0	0	0	0
CS2	22	2	normal	normal	1	2	1	Med	4	>3	0	0	0		Occasional	0	Never	No	20	1	2	2	1	3	0	0	0	0	0	0
CS2	22	2	normal	normal	2	2	1	Med	5	>3	0	0	0		Occasional	0	Never	No	10	1	2	3	0	2	1	0	0	0	0	0
CS2	22	2	normal	normal	2	2	1	Med	4	>3	0	0	0		Occasional	0	Never	No	12	1	2	2	0	2	0	0	0	0	0	0
CS2	22	2	normal	normal	2	3	1	Med	4	>3	0	1	0		Occasional	0	Never	No	20	1	2	1	1	2	0	0	0	0	0	0
CS2	22	2	normal	normal	2	2	1	Med	5	>3	0	0	0		Occasional	0	Never	No	16	1	2	2	0	2	0	0	0	0	0	0
CS2	22	2	normal	normal	1	2	1	Med	4	>3	1	0	0		Occasional	0	Never	No	23	1	2	2	0	2	1	0	0	0	0	0
CS2	22	1	normal	normal	1	2	1	Med	4	>3	0	0	0		Occasional	0	Never	No	4	1	3	2	0	1	0	0	0	0	0	0
CS2	22	2	normal	normal	2	2	1	Med	5	>3	0	1	0		Occasional	0	Never	No	25	1	3	2	0	2	0	0	0	0	0	0
CS2	22	2	normal	normal	2	1	1	Med	3	3	0	0	0		Occasional	0	Never	No	14	1	>3	3	0	2	1	0	0	0	0	0
CS2	22	2	normal	normal	2	2	1	Med	5	>3	1	0	0		Occasional	0	Never	Occasional	25	1	>3	2	1	2	1	0	0	0	0	0
CS2	22	2	underweight	maigreur	2	2	1	Med	5	>3	0	0	0		Occasional	0	Occasional	No	23	1	>3	2	1	2	0	0	0	0	0	0
CS2	22	2	normal	normal	1	2	1	Med	5	>3	0	0	0		Occasional	0	Occasional	No	14	1	1	3	0	1	0	0	0	0	0	0
CS2	22	2	normal	normal	1	2	1	Med	4	>3	0	0	0		Occasional	0	Occasional	No	25	1	1	2	0	2	1	0	0	0	0	0
CS2	22	2	normal	normal	2	2	1	Med	5	>3	0	0	0		Occasional	0	Occasional	No	9	1	1	2	0	2	0	0	0	0	0	0
CS2	22	2	normal	normal	2	2	1	Med	5	>3	0	0	0		Occasional	0	Occasional	No	9	1	1	2	0	2	0	0	0	0	0	0
CS2	22	2	normal	normal	2	2	1	Med	4	>3	0	0	0		Occasional	0	Occasional	No	11	1	1	2	0	2	1	0	0	0	0	0
CS2	22	2	normal	normal	2	1	1	Med	4	>3	0	0	0		Occasional	0	Occasional	No	14	1	2	2	0	2	0	0	0	0	0	0
CS2	22	1	normal	normal	2	2	1	Med	4	>3	0	1	0		Occasional	0	Occasional	No	16	1	2	3	0	2	0	0	0	0	0	0
CS2	22	1	normal	normal	2	2	1	Med	4	>3	0	0	0		Occasional	0	Occasional	No	22	1	2	3	1	2	0	0	0	0	0	0
CS2	22	2	normal	normal	2	2	1	Med	4	>3	0	0	0		Occasional	0	Occasional	No	13	1	2	2	0	2	0	0	0	0	0	0
CS2	22	2	normal	normal	2	2	1	Med	3	3	0	0	0		Occasional	0	Occasional	No	14	1	2	2	0	2	0	0	0	0	0	0
CS2	22	2	normal	normal	2	1	1	Med	5	>3	0	0	0		Occasional	0	Occasional	No	11	1	2	2	0	1	0	0	0	0	0	0
CS2	22	1	normal	normal	1	2	1	Med	4	>3	1	1	0		Occasional	0	Occasional	No	14	1	2	3	0	2	1	0	0	0	0	0
CS2	22	2	normal	normal	1	2	1	Med	4	>3	0	1	0		Occasional	0	Occasional	No	11	1	3	2	0	2	1	0	0	0	0	0
CS2	22	2	normal	normal	1	1	1	Med	5	>3	1	0	0		Occasional	0	Occasional	No	14	1	3	2	1	1	1	0	0	0	0	0
CS2	22	1	normal	normal	2	1	1	Med	4	>3	0	0	0		Occasional	0	Occasional	No	18	1	3	2	0		0	0	0	0	0	0
CS2	22	2	normal	normal	2	2	1	Med	3	3	0	0	0		Occasional	0	Occasional	No	5	1	3	2	0	1	0	0	0	0	0	0
CS2	22	1	normal	normal	2	2	1	Med	4	>3	0	0	0		Occasional	0	Occasional	No	14	1	>3	3	0	2	0	0	0	0	0	0
CS2	22	2	normal	normal	1	2	1	Med	3	3	0	0	0		Occasional	0	Occasional	No	17	1	>3	2	0	2	0	0	0	0	0	0
CS2	22	2	normal	normal	2	2	1	Med	3	3	0	1	0		Occasional	0	Occasional	No	29	1	>3	2	0	2	1	0	0	0	0	0
CS2	22	1			2	2	1	Med	3	3	0	0	0		Occasional	0	Occasional	No	11	1	2	3	0	1	0	0	0	0	0
CS2	22	2	underweight	maigreur	1	2	1	Med	5	>3	1	0	0		Occasional	0	Occasional	Occasional	28	1	>3	2	0	2	1	0	0	0	0	0
CS2	22	2	normal	normal	1	2	1	Med	5	>3	0	0	0		Occasional	0	Occasional	Occasional	15	1	1	1	0	2	1	0	0	0	0	0
CS2	22	2	normal	normal	1	1	1	Med	4	>3	0	1	0		Occasional	0	Occasional	Occasional	11	1	1	1	0	2	0	0	0	0	0	0
CS2	22	2	normal	normal	2	2	1	Med	3	3	0	0	0		Occasional	0	Occasional	Occasional	14	1	1	2	0	2	0	0	0	0	0	0
CS2	22	1	normal	normal	2	2	1	Med	5	>3	0	1	0		Occasional	0	Occasional	Occasional	10	1	1	2	0	3	0	0	0	0	0	0
CS2	22	1	normal	normal	1	2	1	Med	5	>3	0	1	0		Occasional	0	Occasional	Occasional	10	1	2	2	1	2	0	0	0	0	0	0
CS2	22	1	normal	normal	1	2	1	Med	4	>3			0		Occasional	0	Occasional	Occasional	16	1	2	2	0	2	0	0	0	0	0	0
CS2	22	2	normal	normal	1	2	1	Med	4	>3	0	0	0		Occasional	0	Occasional	Occasional	31	1	2	2	1	3	0	0	0	0	0	0
CS2	22	2	normal	normal	2	2	1	Med	4	>3	0	1	0		Occasional	0	Occasional	Occasional	9	1	2	1	0	2	0	0	0	0	0	0
CS2	22	2	normal	normal	2	2	1	Med	4	>3	0	1	0		Occasional	1	Never	No	16	1	2	2	0	2	1	0	0	0	0	0
CS2	22	1	normal	normal	2	2	1	Med	4	>3	0	0	0		Occasional	1	Never	Occasional	8	1	>3	3	0	1	0	0	0	0	0	0
CS2	22	1	normal	normal	2	2	1	Med	4	>3	0	1	0		Occasional	1	Occasional	No	1	1	2	3	0	1	0	0	0	0	0	0
CS2	22	1	normal	normal	2	2	1	Med	5	>3	0	0	0		Occasional	1	Occasional	No	19	1	2	2	0	2	0	0	0	0	0	0
CS2	22	2	normal	normal	2	2	1	Med	4	>3	0	1	0		Occasional	1	Occasional	No	3	1	2	2	0	2	0	0	0	0	0	0
CS2	22	1	normal	normal	2	2	1	Med	5	>3	0	0	0		Occasional	1	Occasional	No	9	1	2	2	0	2	0	0	0	0	0	0
CS2	22	1	normal	normal	1	1	1	Med	4	>3	0	0	0		Occasional	1	Occasional	No	3	1	3	3	0	1	0	0	0	0	0	0
CS2	22	2	normal	normal	2	1	1	Med	4	>3	1	0	0		Occasional	1	Occasional	No	17	1	3	2	0	1	0	0	0	0	0	0
CS2	22	1	normal	normal	2	1	1	Med	4	>3	0	0	0		Occasional	1	Occasional	No	15	1	>3	3	0	2	0	0	0	0	0	0
CS2	22	2	underweight	maigreur	2	2	1	Med	4	>3	0	0	0		Occasional	1	Occasional	Occasional	16	1	1	3	0	1	1	0	0	0	0	0
CS2	22	2	normal	normal	1	2	1	Med	5	>3	0	0	0		Occasional	1	Occasional	Occasional	18	1	1	2	1	2	0	0	0	0	0	0
CS2	22	2	normal	normal	2	2	1	Med	5	>3	0	0	0		Occasional	1	Occasional	Occasional	23	1	1	2	1	2	1	0	0	0	0	0
CS2	22	2	normal	normal	1	2	1	Med	5	>3	0	1	0		Occasional	1	Occasional	Occasional	10	1	1	2	0	2	0	0	0	0	0	0
CS2	22	1	normal	normal	2	2	1	Med	5	>3	1	0	0		Occasional	1	Occasional	Occasional	19	1	2	2	0	2	0	0	0	0	0	0
CS2	22	2	normal	normal	2	2	1	Med	4	>3	0	0	0		Occasional	1	Occasional	Occasional	29	1	2	2	1	2	0	0	0	0	0	0
CS2	22	2	normal	normal	1	2	1	Med	4	>3	0	0	0		Occasional	1	Occasional	Occasional	22	1	2	2	0	2	0	0	0	0	0	0
CS2	22	1	normal	normal	2	1	1	Med	2	2	0	1	0		Occasional	1	Occasional	Occasional	13	1	3	1	0	2	0	0	0	0	0	0
CS2	22	2	normal	normal	2	1	1	Med	3	3	0	0	0		Occasional	1	Occasional	Occasional	28	1	3	3	1	2	1	0	0	0	0	0
CS2	22	1	normal	normal	1	2	1	Med	3	3	0	0	0		Occasional	1	Occasional	Occasional	0	1	>3	3	0	1	0	0	0	0	0	0
CS2	22	2	normal	normal	2	2	1	Med	4	>3	0	0	0			0	Occasional	Occasional	22	1	2	3	0	2	1	0	0	0	0	0
CS2	22	1	normal	normal	1	2	1	Med	5	>3	1	0	1	7	Occasional	0	Never	Occasional	21	1	2	2	0	2	1	1	1	0	0	0
CS2	22	1	overweight	overweight	2	2	1	Med	4	>3	0	0	0		Occasional	0	Occasional	No	6	1	1	2	0	2	0	1	0	0	0	1
CS2	22	2	overweight	overweight	1	2	1	Med	2	2	0	0	0		Occasional	0	Occasional	No	5	1	1	3	0	1	0	1	0	0	0	1
CS2	22	1	normal	normal	2	2	1	Med	5	>3	1	0	1	5	Occasional	0	Occasional	No	0	1	1	2	0	2	0	1	1	0	0	0
CS2	22	2	normal	normal	2	2	1	Med	5	>3	0	0	1	5	Occasional	0	Occasional	No	18	1	2	2	0	2	1	1	1	0	0	0
CS2	22	2	normal	normal	1	2	1	Med	4	>3	0	0	1	2	Occasional	0	Occasional	No	14	1	3	2		1	0	1	1	0	0	0
CS2	22	2	normal	normal	2	2	1	Med	4	>3	0	0	1	5	Occasional	0	Occasional	Occasional	25	1	2	3	1	2	1	1	1	0	0	0
CS2	22	2	normal	normal	1	2	1	Med	3	3	1	0	1	6	Occasional	0	Occasional	Occasional	19	1	2	2	0	2	0	1	1	0	0	0
CS2	22	1	normal	normal	1	2	1	Med	3	3	0	0	1	10	Occasional	0	Occasional	Occasional	12	1	>3	2	1	2	0	1	1	0	0	0
CS2	22	1	overweight	overweight	1	2	1	Med	4	>3	0	0	0		Occasional	1	Never	Occasional	9	1	2	2	0	2	0	1	0	0	0	1
CS2	22	1	obesity	overweight	1	2	1	Med	5	>3	1	0	0		Occasional	1	Occasional	No	12	1	2	3	0	3	0	1	0	0	0	1
CS2	22	1	overweight	overweight	2	2	1	Med	4	>3	0	0	0		Occasional	1	Occasional	No	16	1	>3	3	1	2	0	1	0	0	0	1
CS2	22	2	normal	normal	1	2	1	Med	3	3	0	1	1	4	Occasional	1	Occasional	No	14	1	1	2	0	2	0	1	1	0	0	0
CS2	22	1	normal	normal	1	2	1	Med	4	>3	1	1	1	15	Occasional	1	Occasional	No	23	1	3	2	0	2	1	1	1	0	0	0
CS2	22	2	overweight	overweight	2	2	1	Med	3	3	1	1	0		Occasional	1	Occasional	Occasional	23	1	>3	2	1	1	1	1	0	0	0	1
CS2	22	1	normal	normal	1	2	1	Med	5	>3	1	0	1	10	Occasional	1	Occasional	Occasional	10	1	2	3	0	2	0	1	1	0	0	0
CS2	22	2	normal	normal	1	2	1	Med	4	>3	0	0	1	0.5	Occasional	1	Occasional	Occasional	9	1	2	2	0	2	0	1	1	0	0	0
CS2	22	2	normal	normal	2	2	1	Med	3	3	1	0	1	10	Occasional	1	Occasional	Occasional	13	1	>3	2	0	2	0	1	1	0	0	0
CS2	22	1	normal	normal	2	2	1	Med	3	3	0	0	1	5	Occasional	1	Occasional	Occasional	6	1	>3	2	0	1	0	1	1	0	0	0
CS2	22	1	normal	normal	1	2	1	Med	5	>3	1	0	0		Frequent	0	Frequent	No	11	1	1	2	0	1	0	1	0	1	0	0
CS2	22	2	normal	normal	2	2	1	Med	4	>3	1	1	0		Frequent	0	Frequent	Occasional	14	1	>3	2	1	2	0	1	0	1	0	0
CS2	22	1	normal	normal	2	2	1	Med	4	>3	0	0	1	12	Frequent	0	Never	Occasional	6	1	2	2	1	2	0	2	1	1	0	0
CS2	22	1	normal	normal	2	2	1	Med	5	>3	1	0	0		Frequent	0	Occasional	No	9	1	2	2	0	1	0	1	0	1	0	0
CS2	22	2	normal	normal	1	2	1	Med	3	3	0	0	0		Frequent	0	Occasional	No	19	1	2	2	0	2	0	1	0	1	0	0
CS2	22	2	normal	normal	2	2	1	Med	5	>3	0	1	0		Frequent	0	Occasional	No	21	1	2	2	0	2	1	1	0	1	0	0
CS2	22	1	normal	normal	1	2	1	Med	3	3	0	1	0		Frequent	0	Occasional	No	5	1	3	3	0	1	0	1	0	1	0	0
CS2	22	1	normal	normal	2	2	1	Med	4	>3	1	1	0		Frequent	0	Occasional	No	17	1	3	3	0	2	1	1	0	1	0	0
CS2	22	1	normal	normal	2	2	1	Med	4	>3	1	0	0		Frequent	0	Occasional	Occasional	27	1	2	2	0	2	0	1	0	1	0	0
CS2	22	1	normal	normal	2	2	1	Med	5	>3	0	0	0		Frequent	0	Occasional	Occasional	5	1	2	2	0	2	0	1	0	1	0	0
CS2	22	1	normal	normal	2	2	1	Med	3	3	1	0	0		Frequent	0	Occasional	Occasional	5	1	3	2	0	1	1	1	0	1	0	0
CS2	22	1	normal	normal	2	2	1	Med	4	>3	0	0	0		Frequent	0	Occasional	Occasional	16	1	>3	2	0	2	0	1	0	1	0	0
CS2	22	1	normal	normal	2	2	1	Med	4	>3	0	0	0		Frequent	1	Frequent	No	8	1	2	1	0	2	0	1	0	1	0	0
CS2	22	1	normal	normal	2	2	1	Med	4	>3	0	1	0		Frequent	1	Frequent	No	18	1	3	2	1	2	0	1	0	1	0	0
CS2	22	2	normal	normal		2	1	Med	5	>3	0	0	0	5	Frequent	1	Frequent	Occasional	22	1	1	1	0	2	0	1	0	1	0	0
CS2	22	1	normal	normal	2	2	1	Med	5	>3	0	0	0		Frequent	1	Frequent	Occasional	5	1	2	2	0	2	0	1	0	1	0	0
CS2	22	1	normal	normal	1	1	1	Med	3	3	0	1	0		Frequent	1	Frequent	Occasional	16	1	>3	3	0	2	0	1	0	1	0	0
CS2	22	2	normal	normal	1	1	1	Med	3	3	1	1	1	5	Frequent	1	Never	Occasional	10	1	>3	3	0	2	0	2	1	1	0	0
CS2	22	2	normal	normal		1	1	Med	5	>3	0	0	0	1	Frequent	1	Occasional	Occasional	22	1	1	2	1	3	0	1	0	1	0	0
CS2	22	1	normal	normal	2	2	1	Med	4	>3	0	0	0		Frequent	1	Occasional	Occasional	13	1	3	3	1	2	0	1	0	1	0	0
CS2	22	2	overweight	overweight	2	2	1	Med	2	2	0	0	1	10	Occasional	1	Occasional	No	28	1	>3	1	1	2	1	2	1	0	0	1
CS2	22	1	obesity	overweight	2	2	1	Med	5	>3	1	0	0		Frequent	0	Never	No	7	1	3	2	0	2	0	2	0	1	0	1
CS2	22	2	normal	normal	1	2	1	Med	5	>3	1	1	1	2	Frequent	0	Occasional	No	5	1	3	2	0	2	0	2	1	1	0	0
CS2	22	1	normal	normal	2	2	1	Med	5	>3	0	0	1	10	Frequent	0	Occasional	Occasional	3	1	2	2	0	2	0	2	1	1	0	0
CS2	22	2	underweight	maigreur	1	2	1	Med	4	>3	1	0	1	10	Frequent	1	Frequent	Occasional	9	1	1	2	0	3	0	2	1	1	0	0
CS2	22	1	normal	normal	1	2	1	Med	4	>3	1	0	1	10	Frequent	1	Frequent	Occasional	1	1	2	2	0	1	0	2	1	1	0	0
CS2	22	1	normal	normal	1	2	1	Med	4	>3	0	0	1	10	Frequent	1	Frequent	Occasional	5	1	3	2	0	2	0	2	1	1	0	0
CS2	22	1	normal	normal	1	2	1	Med	3	3	1	0	1	15	Frequent	1	Frequent	Occasional	2	1	>3	2	0	2	0	2	1	1	0	0
CS2	22	2	underweight	maigreur	2	1	1	Med	3	3	0	0	0		Never	0	Never	No	23	1	1	1	0	2	1	0	0	0	0	0
CS2	22	2	normal	normal	1	1	1	Med	4	>3	0	1	0		Never	0	Never	No	15	1	1	2	0	2	0	0	0	0	0	0
CS2	22	1	normal	normal	2	2	1	Med	4	>3	0	1	0		Never	0	Never	No	4	1	1	2	0	2	0	0	0	0	0	0
CS2	23	2	normal	normal	1	2	1	Med	3	3	0	0	0		Occasional	0	Never	No	7	1	2	3	0	2	0	0	0	0	0	0
CS2	23	2	normal	normal	1	2	1	Med	3	3	0	0	0		Occasional	0	Never	No	7	1	3	2	0	2	0	0	0	0	0	0
CS2	23	1	normal	normal	2	1	1	Med	4	>3	0	0	0		Occasional	0	Occasional	No	4	1	1	3	0	2	0	0	0	0	0	0
CS2	23	1	normal	normal	2	2	1	Med	4	>3	0	0	0		Occasional	1	Occasional	No	3	1	3	3	0	2	0	0	0	0	0	0
CS2	23	1	normal	normal	2	2	1	Med	4	>3	0	0	1	7	Occasional	1	Occasional	Occasional	19	1	2	2	0	2	0	1	1	0	0	0
CS2	23	2	normal	normal	2	1	1	Med	5	>3	0	0	0		Occasional	0	Never	No	18	1	1	2	0	2	0	0	0	0	0	0
CS2	23	2	normal	normal	2	2	1	Med	5	>3	0	1	0		Occasional	0	Never	No	15	1	1	3	0	2	0	0	0	0	0	0
CS2	23	2	normal	normal	2	2	1	Med	5	>3	1	0	0		Occasional	0	Never	No	4	1	1	2	0	2	0	0	0	0	0	0
CS2	23	1	normal	normal	1	1	1	Med	4	>3	0	1	0		Occasional	0	Never	No	7	1	1	2	0	2	0	0	0	0	0	0
CS2	23	2	normal	normal	2	2	1	Med	5	>3	0	0	0		Occasional	0	Never	No	14	1	2	3	0	1	0	0	0	0	0	0
CS2	23	1	normal	normal	2	2	1	Med	5	>3	1	0	0		Occasional	0	Never	No	7	1	2	3	1	1	0	0	0	0	0	0
CS2	23	2	normal	normal	2	2	1	Med	4	>3	0	0	0		Occasional	0	Never	No	11	1	2	2	0	2	0	0	0	0	0	0
CS2	23	2	normal	normal	2	2	1	Med	5	>3	1	0	0		Occasional	0	Never	No	19	1	3	2	1	2	0	0	0	0	0	0
CS2	23	2	underweight	maigreur	2	2	1	Med	5	>3	0	0	0		Occasional	0	Occasional	No	21	1	1	3	0	2	0	0	0	0	0	0
CS2	23	2	underweight	maigreur	1	2	1	Med	5	>3	1	1	0		Occasional	0	Occasional	No	28	1	>3	3	1	3	1	0	0	0	0	0
CS2	23	2	normal	normal	1	2	1	Med	4	>3	0	0	0		Occasional	0	Occasional	No	17	1	1	1	0	2	0	0	0	0	0	0
CS2	23	1	normal	normal	2	2	1	Med	4	>3	0	1	0		Occasional	0	Occasional	No	10	1	1	2	0	2	0	0	0	0	0	0
CS2	23	1	normal	normal	2	2	1	Med	5	>3	1	0	0		Occasional	0	Occasional	No	11	1	1	3	0	2	0	0	0	0	0	0
CS2	23	2	normal	normal	2	2	1	Med	5	>3	0	0	0		Occasional	0	Occasional	No	13	1	1	2	0	2	0	0	0	0	0	0
CS2	23	2	normal	normal	1	1	1	Med	5	>3	0	0	0		Occasional	0	Occasional	No	11	1	1	2	0	1	0	0	0	0	0	0
CS2	23	2	normal	normal	1	2	1	Med	5	>3	0	0	0		Occasional	0	Occasional	No	10	1	1	2	0	2	0	0	0	0	0	0
CS2	23	1	normal	normal	2	2	1	Med	5	>3	0	1	0		Occasional	0	Occasional	No	12	1	2	2	0	2	0	0	0	0	0	0
CS2	23	1	normal	normal	1	1	1	Med	5	>3	0	0	0		Occasional	0	Occasional	No	19	1	2	3	0	1	0	0	0	0	0	0
CS2	23	2	normal	normal	2	2	1	Med	5	>3	0	0	0		Occasional	0	Occasional	No	8	1	2	2	0	2	0	0	0	0	0	0
CS2	23	2	normal	normal	1	2	1	Med	5	>3	0	0	0	5	Occasional	0	Occasional	No	6	1	2	2	0	2	0	0	0	0	0	0
CS2	23	2	normal	normal	1	2	1	Med	5	>3	0	0	0		Occasional	0	Occasional	No	14	1	2	2	0	2	0	0	0	0	0	0
CS2	23	2	normal	normal	2	2	1	Med	5	>3	0	1	0		Occasional	0	Occasional	No	12	1	2	2	0	2	0	0	0	0	0	0
CS2	23	1	normal	normal	1	2	1	Med	5	>3	1	0	0		Occasional	0	Occasional	No	10	1	3	2	0	1	0	0	0	0	0	0
CS2	23	2	normal	normal	2	2	1	Med	5	>3	1	0	0		Occasional	0	Occasional	No	7	1	3	2	0	1	0	0	0	0	0	0
CS2	23	1	normal	normal	1	2	1	Med	5	>3	0	0	0		Occasional	0	Occasional	No	9	1	3	2	0	2	0	0	0	0	0	0
CS2	23	2	normal	normal	2	2	1	Med	5	>3	0	0	0		Occasional	0	Occasional	No	17	1	3	3	0	2	0	0	0	0	0	0
CS2	23	2	normal	normal	1	2	1	Med	4	>3	0	0	0		Occasional	0	Occasional	No	15	1	3	2		2	1	0	0	0	0	0
CS2	23	2	normal	normal	1	1	1	Med	4	>3	0	0	0		Occasional	0	Occasional	No	20	1	>3	3	0	2	1	0	0	0	0	0
CS2	23	2	normal	normal	2	2	1	Med	5	>3	0	1	0		Occasional	0	Occasional	No	14	1	>3	1	0	2	0	0	0	0	0	0
CS2	23	2	normal	normal	2	1	1	Med	4	>3	0	0	0		Occasional	0	Occasional	Occasional	13	1	1	3	0	2	0	0	0	0	0	0
CS2	23	2	normal	normal	2	2	1	Med	5	>3	0	0	0		Occasional	0	Occasional	Occasional	29	1	1	3	0	2	1	0	0	0	0	0
CS2	23	1	normal	normal	2	2	1	Med	5	>3	0	0	0		Occasional	0	Occasional	Occasional	19	1	3	2	0	2	0	0	0	0	0	0
CS2	23	2	normal	normal	1	2	1	Med	5	>3	0	0	0		Occasional	0	Occasional	Occasional	10	1	3	2	0	1	0	0	0	0	0	0
CS2	23	2			2	2	1	Med	4	>3	0	1	0		Occasional	1	Never	Occasional	5	1	1	2	1	2	1	0	0	0	0
CS2	23	1	normal	normal	2	2	1	Med	5	>3	0	1	0		Occasional	1	Occasional	No	6	1	1	1	0	1	1	0	0	0	0	0
CS2	23	2	normal	normal	2	2	1	Med	5	>3	0	0	0		Occasional	1	Occasional	No	23	1	1	2	0	2	0	0	0	0	0	0
CS2	23	2	normal	normal	2	2	1	Med	5	>3	0	1	0		Occasional	1	Occasional	No	13	1	1	1	0	2	0	0	0	0	0	0
CS2	23	2	normal	normal	2	1	1	Med	5	>3	0	0	0		Occasional	1	Occasional	No	16	1	2	3	1	2	1	0	0	0	0	0
CS2	23	2	normal	normal	1	2	1	Med	5	>3	0	1	0		Occasional	1	Occasional	No	5	1	3	2	0	2	0	0	0	0	0	0
CS2	23	2	normal	normal	2	2	1	Med	5	>3	0	0	0		Occasional	1	Occasional	No	20	1	3	2	0	2	1	0	0	0	0	0
CS2	23	2	normal	normal	1	2	1	Med	5	>3	1	1	0		Occasional	1	Occasional	No	9	1	>3	2	0	2	0	0	0	0	0	0
CS2	23	2			1	2	1	Med	5	>3	0	0	0		Occasional	1	Occasional	No	22	1	1	3	0	2	0	0	0	0	0
CS2	23	2	normal	normal	2	2	1	Med	4	>3	0	1	0		Occasional	1	Occasional	Occasional	14	1	1	3	0	2	1	0	0	0	0	0
CS2	23	1	normal	normal	2	2	1	Med	5	>3	0	0	0		Occasional	1	Occasional	Occasional	18	1	1	3	0	2	0	0	0	0	0	0
CS2	23	2	normal	normal	2	2	1	Med	4	>3	0	1	0		Occasional	1	Occasional	Occasional	14	1	2	2	0	2	0	0	0	0	0	0
CS2	23	1	normal	normal	2	2	1	Med	5	>3	0	0	0		Occasional	1	Occasional	Occasional	18	1	2	3	0	2	1	0	0	0	0	0
CS2	23	2	normal	normal	2	2	1	Med	3	3	1	0	0		Occasional	1	Occasional	Occasional	12	1	2	2	0	2	0	0	0	0	0	0
CS2	23	2	underweight	maigreur	1	1	1	Med	3	3	0	0	0		Frequent	0	Never	No	21	1	2	2	0	2	1	1	0	1	0	0
CS2	23	2	normal	normal	2	2	1	Med	5	>3	0	1	0		Frequent	0	Never	No	7	1	2	3	0	1	0	1	0	1	0	0
CS2	23	1	overweight	overweight	2	2	1	Med	5	>3	0	0	0		Occasional	0	Occasional	No	6	1	>3	1	0	2	0	1	0	0	0	1
CS2	23	2	normal	normal	2	2	1	Med	5	>3	0	0	1	10	Occasional	0	Occasional	No	12	1	2	2	0	2	0	1	1	0	0	0
CS2	23	1	normal	normal	2	2	1	Med	5	>3	0	0	1	7	Occasional	0	Occasional	No	23	1	2	1	0	2	1	1	1	0	0	0
CS2	23	2	normal	normal	2	2	1	Med	5	>3	1	0	1	7	Occasional	0	Occasional	No	4	1	>3	2	0	2	1	1	1	0	0	0
CS2	23	2	normal	normal	2	2	1	Med	5	>3	0	0	1	6	Occasional	0	Occasional	No	1	1	>3	3	1	1	0	1	1	0	0	0
CS2	23	1	overweight	overweight	2	2	1	Med	4	>3	0	0	0		Occasional	0	Occasional	Occasional	11	1	1	1	0	2	0	1	0	0	0	1
CS2	23	2	normal	normal	2	2	1	Med	4	>3	1	1	1	3	Occasional	0	Occasional	Occasional	18	1	1	2	0	2	1	1	1	0	0	0
CS2	23	1	normal	normal	2	2	1	Med	5	>3	1	0	1	10	Occasional	0	Occasional	Occasional	12	1	2	2	0	2	0	1	1	0	0	0
CS2	23	1	normal	normal	2	2	1	Med	5	>3	0	0	1	0.3	Occasional	0	Occasional	Occasional	5	1	2	2	0	2	0	1	1	0	0	0
CS2	23	1	normal	normal	2	2	1	Med	5	>3	0	0	1	8	Occasional	0	Occasional	Occasional	8	1	2	3	0	2	0	1	1	0	0	0
CS2	23	1	normal	normal	1	2	1	Med	4	>3	1	0	1		Occasional	0	Occasional	Occasional	11	1	>3	3		2	0	1	1	0	0	0
CS2	23	2	normal	normal	1	2	1	Med	4	>3	0	0	0		Occasional	1	Frequent	No	17	1	2	2	1	2	1	1	0	1	0	0
CS2	23	1	normal	normal	2	2	1	Med	5	>3	0	1	0		Occasional	1	Frequent	No	6	1	>3	2	0	2	0	1	0	1	0	0
CS2	23	1	normal	normal		2	1	Med	4	>3	1	1	0		Occasional	1	Frequent	Occasional	16	1	2	2	0	2	0	1	0	1	0	0
CS2	23	1	normal	normal	2	2	1	Med	5	>3	0	1	0		Occasional	1	Frequent	Occasional	2	1	>3	2	0	2	0	1	0	1	0	0
CS2	23	1	normal	normal	2	2	1	Med	5	>3	0	0	1	10	Occasional	1	Occasional	No	7	1	3	2	0	2	1	1	1	0	0	0
CS2	23	2	normal	normal	1	2	1	Med	5	>3	1	0	0		Occasional		Frequent	No	23	1	2	3	0	2	0	1	0	1	0	0
CS2	23	2	normal	normal	1	2	1	Med	5	>3	1	0	0		Frequent	0	Frequent	Occasional	26	1	>3	3	0	2	1	1	0	1	0	0
CS2	23	1	normal	normal	1	2	1	Med	4	>3	0	0	0	20	Frequent	0	Never	Occasional	8	1	1	3	0	3	0	1	0	1	0	0
CS2	23	1	normal	normal	2	2	1	Med	4	>3	0	0	0		Frequent	0	Never	Occasional	3	1	2	3	0	2	0	1	0	1	0	0
CS2	23	1	normal	normal	2	2	1	Med	5	>3	1	1	0		Frequent	0	Occasional	No	13	1	>3	3	0	1	0	1	0	1	0	0
CS2	23	1	normal	normal	1	1	1	Med	5	>3	1	0	0		Frequent	0	Occasional	Occasional	20	1	3	3	0	2	1	1	0	1	0	0
CS2	23	2	normal	normal	2	2	1	Med	5	>3	0	0	0		Frequent	0	Occasional	Occasional	12	1	>3	2	1	1	0	1	0	1	0	0
CS2	23	2	normal	normal	2	2	1	Med	5	>3	0	0	0		Frequent	1	Frequent	Occasional	18	1	2	2	0	2	0	1	0	1	0	0
CS2	23	2	normal	normal	2	2	1	Med	3	3	0	0	0		Frequent	1	Occasional	Occasional	18	1	2	3	0	2	1	1	0	1	0	0
CS2	23	2	normal	normal	2	2	1	Med	5	>3	0	0	1	5	Frequent	0	Occasional	No	23	1	1	3	0	2	0	2	1	1	0	0
CS2	23	2	normal	normal	2	1	1	Med	5	>3	0	0	1	6	Frequent	0	Occasional	No	8	1	2	2	0	2	0	2	1	1	0	0
CS2	23	1	normal	normal	1	2	1	Med	5	>3	0	0	1	3	Frequent	0	Occasional	Occasional	14	1	2	2	1	2	0	2	1	1	0	0
CS2	23	1	normal	normal	1	2	1	Med	5	>3	0	0	1	5	Frequent	1	Frequent	Occasional	0	1	1	3	0	2	0	2	1	1	0	0
CS2	23	1	normal	normal	1	2	1	Med	4	>3	1	1	1		Frequent	1	Frequent	Occasional	1	1	3	2	0	1	0	2	1	1	0	0
CS2	23	1	overweight	overweight	1	2	1	Med	4	>3	1	0	0		Frequent	1	Occasional	Occasional	4	1	2	3	0	2	0	2	0	1	0	1
CS2	23	1	normal	normal	2	2	1	Med	4	>3	0	0	1	10	Frequent	1	Occasional	Occasional	13	1	1	2		2	0	2	1	1	0	0
CS2	23	1	normal	normal	2	2	1	Med	5	>3	1	1	1	1	Frequent	1	Occasional	Occasional	11	1	1	1	0	3	0	2	1	1	0	0
CS2	23	1	overweight	overweight	1	2	1	Med	4	>3	1	0	1	15	Frequent	1	Frequent	Occasional	8	1	2	3	0	2	1	3	1	1	0	1
CS2	23	2	underweight	maigreur	2	2	1	Med	5	>3	0	1	0		Never	0	Never	No	12	1	>3	3	1	2	1	0	0	0	0	0
CS2	23	2	underweight	maigreur	2	2	1	Med	2	2	0	1	0		Never	0	Never	No	28	1	>3	2	1	3	1	0	0	0	0	0
CS2	23	1	normal	normal	2	3	1	Med	4	>3	0	1	0		Never	0	Never	No	12	1	1	2	0	2	0	0	0	0	0	0
CS2	23	2	normal	normal	2	2	1	Med	5	>3	0	0	0		Never	0	Never	No	21	1	1	1	0	2	0	0	0	0	0	0
CS2	23	1	normal	normal	2	2	1	Med	5	>3	0	0	0		Never	0	Never	No	13	1	2	3	0	2	0	0	0	0	0	0
CS2	23	2	normal	normal		2	1	Med	5	>3	1	0	1	5	Occasional	1	Occasional	No	14	1	2	2	0	2	0	1	1	0	0	0
CS2	24	1	normal	normal	1	2	1	Med	3	3	0	0	0		Occasional	0	Never	No	29	1	1	3	0	1	1	0	0	0	0	0
CS2	24	1	normal	normal	2	2	1	Med	4	>3	0	1	0		Occasional	1	Occasional	No	21	1	2	2	0	1	0	0	0	0	0	0
CS2	24	1	overweight	overweight	1	2	1	Med	5	>3	0	0	0		Frequent		Occasional	No	0	1	1	1	0	1	0	2	0	1	0	1
CS2	24	2	underweight	maigreur	2	2	1	Med	5	>3	0	0	0		Occasional	0	Never	No	24	1	1	3	0	2	1	0	0	0	0	0
CS2	24	2	normal	normal	2	2	1	Med	5	>3	0	1	0		Occasional	0	Never	No	21	1	2	2	0	2	0	0	0	0	0	0
CS2	24	1	normal	normal	2	2	1	Med	5	>3	0	0	0		Occasional	0	Occasional	No	7	1	1	3	0	2	0	0	0	0	0	0
CS2	24	2	normal	normal	2	1	1	Med	5	>3	1	0	0		Occasional	0	Occasional	No	24	1	2	2	0	2	1	0	0	0	0	0
CS2	24	2	normal	normal	1	2	1	Med	4	>3	1	0	0		Occasional	1	Never	Occasional	16	1	1	3	1	2	0	0	0	0	0	0
CS2	24	1	normal	normal	2	2	1	Med	5	>3	0	0	0		Occasional	1	Never	Occasional	19	1	1	2		2	0	0	0	0	0	0
CS2	24	1	normal	normal		2	1	Med	5	>3	0	0	0		Occasional	1	Occasional	No	7	1	2	2	0	1	0	0	0	0	0	0
CS2	24	1	normal	normal	2	2	1	Med	4	>3	0	1	0		Occasional	1	Occasional	No	14	1	2	1	0	2	1	0	0	0	0	0
CS2	24	2			2	2	1	Med	5	>3			0		Occasional	1	Occasional	No	15	1	3	3	0	2	0	0	0	0	0
CS2	24	2	normal	normal	2	2	1	Med	5	>3	1	0	0		Occasional	1	Occasional	Occasional	5	1	2	2	0	1	0	0	0	0	0	0
CS2	24	2	normal	normal	2	2	1	Med	5	>3	0	0	0		Occasional	1	Occasional	Occasional	8	1	3	3	0	2	0	0	0	0	0	0
CS2	24	1	normal	normal	2	2	1	Med	5	>3	0	0	0		Occasional	1	Occasional	Occasional	10	1	3	3	1	1	0	0	0	0	0	0
CS2	24	2	overweight	overweight	1	1	1	Med	3	3	0	0	0		Occasional	0	Occasional	No	25	1	1	2	0	2	1	1	0	0	0	1
CS2	24	1	overweight	overweight	2	2	1	Med	5	>3	0	0	0		Occasional	0	Occasional	No	2	1	1	2	0	2	0	1	0	0	0	1
CS2	24	1	normal	normal	2	2	1	Med	5	>3	0	0	1	8	Occasional	0	Occasional	No	8	1	1	3	0	2	0	1	1	0	0	0
CS2	24	2	normal	normal	2	2	1	Med	5	>3	0	1	1	2	Occasional	0	Occasional	No	12	1	3	3	0	2	0	1	1	0	0	0
CS2	24	1	normal	normal	2	2	1	Med	4	>3	1	0	1	10	Occasional	0	Occasional	Occasional	5	1	2	2	0	2	0	1	1	0	0	0
CS2	24	1	normal	normal	2	2	1	Med	4	>3	1	0	1	5	Occasional	0	Occasional	Occasional	13	1	2	1	0	2	0	1	1	0	0	0
CS2	24	1	normal	normal	2	2	1	Med	5	>3	0	0	1	5	Occasional	0	Occasional	Occasional	10	1	2	2	0	2	0	1	1	0	0	0
CS2	24	1	normal	normal	2	2	1	Med	5	>3	0	0	1	10	Occasional	1	Never	Occasional	3	1	1	2	0	2	0	1	1	0	0	0
CS2	24	1	normal	normal	1	2	1	Med	5	>3	1	0	1	4	Occasional	1	Occasional	Occasional	19	1	3	3	0	2	0	1	1	0	0	0
CS2	24	1	normal	normal	1	2	1	Med	3	3	0	0	0		Frequent	0	Frequent	Occasional	5	1	>3	2	0	2	0	1	0	1	0	0
CS2	24	2	normal	normal	1	2	1	Med	5	>3	1	0	0		Frequent	0	Occasional	No	17	1	2	2	0	2	1	1	0	1	0	0
CS2	24	2	normal	normal	1	2	1	Med	5	>3	0	0	0		Frequent	0	Occasional	Occasional	25	1	2	2	0	1	1	1	0	1	0	0
CS2	24	1	normal	normal	2	2	1	Med	5	>3	0	0	0		Frequent	0	Occasional	Occasional	4	1	3	3	0	2	0	1	0	1	0	0
CS2	24	2	normal	normal	1	2	1	Med	3	3	1	1	0		Frequent	1	Occasional	Occasional	9	1	>3	3	0	2	0	1	0	1	0	0
CS2	24	1	normal	normal	2	2	1	Med	4	>3	0	0	1	15	Frequent	0	Frequent	Occasional	15	1	2	3	0	2	1	2	1	1	0	0
CS2	24	2	normal	normal	2	2	1	Med	5	>3	1	1	1		Frequent	0	Occasional	No	21	1	1	2	1	2	1	2	1	1	0	0
CS2	24	1	overweight	overweight	2	2	1	Med	4	>3	0	1	0		Frequent	0	Occasional	Occasional	16	1	>3	3	1	2	0	2	0	1	0	1
CS2	24	1	overweight	overweight	1	1	1	Med	5	>3	0	1	0	4	Never	0	Never	Occasional	13	1	2	3	0	3	1	1	0	0	0	1
CS2	25	1	normal	normal	2	2	1	Med	5	>3	0	0	0		Occasional	0	Occasional	No	17	1	3	3	0	2	0	0	0	0	0	0
CS2	25	2	normal	normal	1	2	1	Med	5	>3	1	1	0	1	Occasional	0	Occasional	No	17	1	3	2	1	2	0	0	0	0	0	0
CS2	25	2	normal	normal	1	2	1	Med	3	3	0	0	0		Occasional	0	Occasional	Occasional	26	1	>3	1	1	2	1	0	0	0	0	0
CS2	25	1	normal	normal	2	2	1	Med	5	>3	0	0	0		Occasional	0	Occasional	Occasional	4	1	>3	2	0	1	1	0	0	0	0	0
CS2	25	1	normal	normal	2	2	1	Med	5	>3	0	1	0		Occasional	1	Occasional	No	19	1	>3	3	0	1	0	0	0	0	0	0
CS2	25	1	overweight	overweight	2	2	1	Med	5	>3			0		Occasional	1	Never	Occasional	10	1	>3	3	0	1	0	1	0	0	0	1
CS2	25	1	normal	normal	1	2	1	Med	5	>3	1	0	0		Frequent	0	Occasional	Occasional	14	1	1	2	0	2	1	1	0	1	0	0
CS2	25	1	normal	normal	2	2	1	Med	3	3	0	0	1	15	Frequent	1	Frequent	No	11	1	2	2	0	2	0	2	1	1	0	0
CS2	26	1	normal	normal	1	2	1	Med	5	>3	0	0	0		Occasional	0	Occasional	No	21	1	1	2	1	2	1	0	0	0	0	0
CS2	26	2	normal	normal	1	1	1	Med	5	>3	0	1	0		Never	0	Never	No	29	1	2	3	0	2	1	0	0	0	0	0
CS2	27	1	normal	normal	2	2	1	Med	5	>3	0	0	0		Occasional	0	Never	No	22	1	1	3	0	1	0	0	0	0	0	0
CS2	27	2	overweight	overweight	1	2	1	Med	5	>3	1	1	1	10	Occasional	0	Never	Occasional	6	1	3	3	0	2	0	2	1	0	0	1
CS2	27	2	normal	normal	2	2	1	Med	5	>3	0	0	0		Occasional	0	Never	No	12	1	2	2	0	2	1	0	0	0	0	0
CS2	27	2	normal	normal	1	2	1	Med	4	>3	0	0	0		Occasional	0	Occasional	Occasional	13	1	3	2	0	2	0	0	0	0	0	0
CS2	27	1	normal	normal	1	1	1	Med	3	3	1	0	1	4	Occasional	0	Occasional	No	0	1	1	3	0	1	0	1	1	0	0	0
CS2	27	2	normal	normal	1	3	1	Med	4	>3	1	1	0		Never	0	Never	No	17	1	1	2	1	2	0	0	0	0	0	0
CS2	28	2	normal	normal	1	1	1	Med	4	>3	0	0	0		Occasional		Never	No	15	1	3	2	0	2	0	0	0	0	0	0
CS2	29	1	normal	normal	2	2	1	Med	3	3	0	0	0		Occasional	0	Occasional	No	13	1	1	3	0	2	0	0	0	0	0	0
CS2	36	1	overweight	overweight		2	1	Med	3	3	0	0	0		Frequent	1	Occasional	No	15	1	2	2	0	2	1	2	0	1	0	1
CS2	18	1	normal	normal	1	3	1	Med	2	2	0	1	0		Occasional	1	Occasional	No	23	0			1	2	0	1	0	0	1	0
CS2	18	1	normal	normal	1	2	1	Med	2	2	0	0	0		Frequent	1	Frequent	No	9	0			0	1	1	2	0	1	1	0
CS2	19	1	normal	normal	1	2	1	Med	2	2	0	0	0		Occasional	0	Never	No	15	0			0	1	1	1	0	0	1	0
CS2	19	1	normal	normal	1	2	1	Med	2	2	0	1	0		Frequent	0	Never	No	8	0			0	2	0	2	0	1	1	0
CS2	19	1	normal	normal	1	1	1	Med	2	2	0	0	0		Frequent	1	Occasional	No	4	0			0	2	0	2	0	1	1	0
CS2	19	2	normal	normal	1	2	1	Med	3	3	0	0	0		Occasional	0	Never	No	4	0			0	1	0	1	0	0	1	0
CS2	19	1	normal	normal	1	1	1	Med	2	2	0	0	0		Occasional	0	Occasional	No	14	0			0	2	0	1	0	0	1	0
CS2	19	1	normal	normal	1	3	1	Med	2	2	0	1	0		Occasional	0	Occasional	No	9	0			0	1	0	1	0	0	1	0
CS2	19	1	normal	normal	1	2	1	Med	2	2	0	0	0		Occasional	0	Occasional	No	14	0			0	2	1	1	0	0	1	0
CS2	19	2	normal	normal	2	3	1	Med	2	2	0	1	0		Occasional	1	Occasional	Occasional	1	0			0	1	0	1	0	0	1	0
CS2	19	2	normal	normal	1	2	1	Med	2	2	0	1	0		Occasional		Never	No	4	0			0	1	0	1	0	0	1	0
CS2	19	2	obesity	overweight	1	2	1	Med	2	2	0	0	0		Occasional	0	Never	No	6	0			0	2	0	2	0	0	1	1
CS2	19	1	normal	normal	1	2	1	Med	2	2	0	0	0		Frequent	0	Occasional	No	6	0			0	2	0	2	0	1	1	0
CS2	19	1	normal	normal	1	1	1	Med	2	2	0	0	0		Frequent	1	Frequent	No	1	0			0	1	0	2	0	1	1	0
CS2	19	1	normal	normal	1	2	1	Med	2	2	0	1	0		Frequent	1	Occasional	No	5	0			0	2	0	2	0	1	1	0
CS2	19	2	normal	normal	1	2	1	Med	2	2	0	0	0		Frequent	1	Occasional	No	17	0			1	2	0	2	0	1	1	0
CS2	19	2	normal	normal	1	1	1	Med	2	2	1	0	1	3	Frequent	0	Frequent	Occasional	18	0			1	2	1	3	1	1	1	0
CS2	19	1	overweight	overweight	2	2	1	Med	2	2	0	0	1	10	Frequent	1	Frequent	Regular	21	0			1	2	0	4	1	1	1	1
CS2	20	2	normal	normal	2	2	1	Med	2	2	1	0	0		Occasional	0	Never	Occasional	16	0			0	2	0	1	0	0	1	0
CS2	20	1	normal	normal	2	1	1	Med	2	2	1	0	0		Frequent	0	Occasional	No	10	0			0	2	0	2	0	1	1	0
CS2	20	1	normal	normal	1	2	1	Med	2	2	0	0	0		Frequent	1	Frequent	No	16	0			1	1	0	2	0	1	1	0
CS2	20	2	underweight	maigreur	2	1	1	Med	3	3	0	0	0		Occasional	0	Never	No	33	0			0	2	0	1	0	0	1	0
CS2	20	2	normal	normal	2	2	1	Med	3	3	0	1	0		Occasional	0	Never	No	15	0			0	2	0	1	0	0	1	0
CS2	20	2	normal	normal	2	2	1	Med	3	3	0	0	0		Occasional	0	Never	No	17	0			0	2	0	1	0	0	1	0
CS2	20	2	normal	normal	1	2	1	Med	2	2	0	0	0		Occasional	0	Never	No	13	0			0	2	0	1	0	0	1	0
CS2	20	1	normal	normal	2	2	1	Med	3	3	0	0	0		Occasional	0	Never	No	15	0			0	3	0	1	0	0	1	0
CS2	20	2	normal	normal	1	2	1	Med	2	2	0	0	0		Occasional	0	Never	No	21	0			0	2	1	1	0	0	1	0
CS2	20	2	normal	normal	2	2	1	Med	4	>3	0	0	0		Occasional	0	Never	Occasional	20	0			0	2	0	1	0	0	1	0
CS2	20	2	underweight	maigreur	1	2	1	Med	3	3	1	0	0		Occasional	0	Occasional	No	11	0			0	2	0	1	0	0	1	0
CS2	20	1	normal	normal	1	2	1	Med	2	2	0	0	0		Occasional	0	Occasional	No	20	0	2	3	1	3	0	1	0	0	1	0
CS2	20	2	normal	normal	2	1	1	Med	3	3	0	1	0		Occasional	0	Occasional	No	23	0			0	2	1	1	0	0	1	0
CS2	20	2	normal	normal	2	2	1	Med	3	3	1	0	0		Occasional	0	Occasional	No	14	0			0	2	1	1	0	0	1	0
CS2	20	2	normal	normal		3	1	Med	2	2	0	0	0		Occasional	1	Never	No	13	0			0	2	0	1	0	0	1	0
CS2	20	1	normal	normal	2	2	1	Med	2	2	0	0	0	0.5	Occasional	1	Occasional	No	12	0			0	2	0	1	0	0	1	0
CS2	20	1	normal	normal	1	2	1	Med	2	2	0	0	0		Occasional	1	Occasional	No	10	0			0	2	1	1	0	0	1	0
CS2	20	1	underweight	maigreur	1	1	1	Med	2	2	0	0	0		Occasional		Never	No	8	0			0	1	0	1	0	0	1	0
CS2	20	2	overweight	overweight	2	1	1	Med	3	3	0	0	0		Occasional	0	Never	No	14	0			1	2	0	2	0	0	1	1
CS2	20	2	normal	normal	1	1	1	Med	2	2	0	0	1	5	Occasional	0	Occasional	Occasional	15	0			0	2	0	2	1	0	1	0
CS2	20	2	normal	normal	2	2	1	Med	2	2	0	0	1	4	Occasional	0	Occasional	Occasional	8	0			0	2	0	2	1	0	1	0
CS2	20	2	underweight	maigreur	1	2	1	Med	2	2	0	0	0		Occasional	1	Frequent	No	5	0			0	2	0	2	0	1	1	0
CS2	20	2	normal	normal	1	2	1	Med	2	2	0	0	0		Frequent	0	Never	No	8	0			0	2	0	2	0	1	1	0
CS2	20	2	normal	normal	2	2	1	Med	2	2	1	0	0		Frequent	0	Occasional	No	30	0			0	2	1	2	0	1	1	0
CS2	20	2	normal	normal	1	2	1	Med	2	2	1	0	0		Frequent	0	Occasional	No	17	0			1	2	1	2	0	1	1	0
CS2	20	2	normal	normal		2	1	Med	2	2	0	0	0		Frequent	0	Occasional	No	8	0			0	2	0	2	0	1	1	0
CS2	20	1	normal	normal	1	2	1	Med	2	2	0	0	0		Frequent	1	Frequent	No	6	0			0	2	1	2	0	1	1	0
CS2	20	2	normal	normal	2	1	1	Med	2	2	0	0	0		Frequent	1	Frequent	Occasional	19	0			0	2	0	2	0	1	1	0
CS2	20	1	normal	normal	1	2	1	Med	2	2	0	0	0	5	Frequent	1	Frequent	Occasional	7	0			0	2	0	2	0	1	1	0
CS2	20	1	underweight	maigreur	1	2	1	Med	4	>3	0	1	0		Frequent	1	Frequent	Regular	21	0			0	2	1	2	0	1	1	0
CS2	20	2	normal	normal	1	2	1	Med	3	3	0	0	0	1	Frequent	1	Frequent	Regular	26	0			1	3	0	2	0	1	1	0
CS2	20	1	normal	normal	2	2	1	Med	2	2	0	0	1	20	Frequent	0	Frequent	Regular	11	0			1	1	1	3	1	1	1	0
CS2	20	2	underweight	maigreur	1	3	1	Med	2	2	1	1	1	6	Frequent	0	Occasional	Regular	24	0			1	2	1	3	1	1	1	0
CS2	20	2	underweight	maigreur	1	2	1	Med	2	2	0	0	1	6	Frequent	1	Frequent	Occasional	10	0			0	2	0	3	1	1	1	0
CS2	20	2	normal	normal	2	2	1	Med	3	3	0	0	1	10	Frequent	1	Frequent	Occasional	9	0			0	3	0	3	1	1	1	0
CS2	20	1	normal	normal	2	1	1	Med	2	2	1	1	1	8	Frequent	1	Frequent	Occasional	12	0			0	2	0	3	1	1	1	0
CS2	20	2	normal	normal	1	2	1	Med	4	>3	0	1	1	4	Frequent	1	Frequent	Occasional	16	0			0	2	1	3	1	1	1	0
CS2	20	2	overweight	overweight	2	2	1	Med	3	3	0	1	1	5	Frequent	0	Frequent	Occasional	9	0			0	2	0	4	1	1	1	1
CS2	20	2	normal	normal	2	2	1	Med	3	3	0	0	0		Never	0	Never	No	31	0			1	2	1	1	0	0	1	0
CS2	20	2	normal	normal	1	2	1	Med	3	3	0	0	0		Never	0	Never	No	28	0			1	2	0	1	0	0	1	0
CS2	20	2			1	1	1	Med	3	3	0	0	0		Never	0	Never	No	6	0			0	2	0	1	0	0	1
CS2	20	2	normal	normal	1	2	1	Med	2	2	0	0	0		Occasional	0	Never	No	5	0				2	0	1	0	0	1	0
CS2	21	2	underweight	maigreur	2	2	1	Med	4	>3	0	0	0		Occasional	0	Never	No	18	0			0	2	0	1	0	0	1	0
CS2	21	1	normal	normal	2	2	1	Med	2	2	0	0	1	15	Occasional	0	Occasional	Occasional	16	0			0	2	0	2	1	0	1	0
CS2	21	1	underweight	maigreur	1	1	1	Med	3	3	0	0	0		Occasional	0	Never	No	20	0			0	2	1	1	0	0	1	0
CS2	21	2	normal	normal	1	1	1	Med	3	3	0	1	0		Occasional	0	Never	No	19	0			0	2	1	1	0	0	1	0
CS2	21	1	normal	normal	2	2	1	Med	3	3	0	0	0		Occasional	0	Never	No	9	0			0	2	0	1	0	0	1	0
CS2	21	2	normal	normal	2	2	1	Med	2	2	0	1	0		Occasional	0	Never	No	7	0			0	3	0	1	0	0	1	0
CS2	21	2	normal	normal	2	1	1	Med	4	>3	0	0	0		Occasional	0	Never	No	10	0			0	1	0	1	0	0	1	0
CS2	21	2	normal	normal	1	2	1	Med	3	3	0	0	0		Occasional	0	Occasional	No	11	0			0	1	0	1	0	0	1	0
CS2	21	2	normal	normal	1	2	1	Med	4	>3	0	0	0		Occasional	0	Occasional	No	6	0			0	2	0	1	0	0	1	0
CS2	21	2	normal	normal	1	2	1	Med	4	>3	0	0	0		Occasional	0	Occasional	No	18	0			0	2	1	1	0	0	1	0
CS2	21	2	normal	normal	2	2	1	Med	3	3	0	0	0		Occasional	0	Occasional	No	3	0			0	2	0	1	0	0	1	0
CS2	21	2	underweight	maigreur	2	2	1	Med	4	>3	0	1	0		Occasional	0	Occasional	Occasional	11	0			0	1	0	1	0	0	1	0
CS2	21	2	underweight	maigreur	2	2	1	Med	3	3	0	0	0		Occasional	1	Occasional	No	8	0			0	1	0	1	0	0	1	0
CS2	21	2	normal	normal	1	2	1	Med	4	>3	0	0	0		Occasional	1	Occasional	Occasional	15	0			0	2	0	1	0	0	1	0
CS2	21	2	normal	normal	2	2	1	Med	3	3	0	0	1	8	Occasional	0	Occasional	Occasional	18	0			1	2	1	2	1	0	1	0
CS2	21	1	normal	normal	2	2	1	Med	3	3	0	0	0		Occasional	1	Frequent	Occasional	7	0			0	2	0	2	0	1	1	0
CS2	21	2	normal	normal	1		1	Med	2	2	0	0	0		Occasional	1	Frequent	Occasional	14	0			0	2	0	2	0	1	1	0
CS2	21	1	normal	normal	1	2	1	Med	3	3	0	1	1	8	Occasional	1	Never	Occasional	8	0			0	3	0	2	1	0	1	0
CS2	21	1	normal	normal	2	2	1	Med	5	>3	0	0	1	6	Occasional	1	Occasional	Occasional	19	0			0	2	0	2	1	0	1	0
CS2	21	2	normal	normal	2	2	1	Med	3	3	0	0	0		Frequent	0	Occasional	No	20	0			0	2	1	2	0	1	1	0
CS2	21	2	normal	normal	1	2	1	Med	4	>3	0	0	0	5	Frequent	0	Occasional	No	25	0			0	2	1	2	0	1	1	0
CS2	21	1	underweight	maigreur	2	2	1	Med	3	3	0	1	0		Frequent	0	Occasional	Occasional	9	0			0	1	1	2	0	1	1	0
CS2	21	2	normal	normal	1	2	1	Med	2	2	0	1	0		Frequent	1	Occasional	No	22	0			0	2	1	2	0	1	1	0
CS2	21	1	normal	normal	1	2	1	Med	4	>3	1	0	1	20	Frequent	1	Frequent	Occasional	10	0	3	3	0	1	0	3	1	1	1	0
CS2	21	1	overweight	overweight	1	2	1	Med	3	3	0	0	0		Frequent	1	Occasional	No	1	0			0	2	0	3	0	1	1	1
CS2	21	2	normal	normal	1	2	1	Med	4	>3	1	0	1	15	Frequent	1	Occasional	Regular	5	0			0	2	0	3	1	1	1	0
CS2	22	2	underweight	maigreur	2	2	1	Med	4	>3	1	1	0		Occasional	0	Never	No	30	0			0	2	0	1	0	0	1	0
CS2	22	2	normal	normal	1	1	1	Med	4	>3	0	0	0		Occasional	0	Never	No	2	0			0	2	0	1	0	0	1	0
CS2	22	1	underweight	maigreur	1	2	1	Med	5	>3	0	0	0		Frequent	0	Occasional	No	12	0			0	2	0	2	0	1	1	0
CS2	22	2	underweight	maigreur	1	2	1	Med	4	>3	0	1	0		Occasional	0	Never	No	24	0			0	2	0	1	0	0	1	0
CS2	22	1	normal	normal	1	1	1	Med	4	>3	0	1	0		Occasional	0	Never	No	13	0			0	3	0	1	0	0	1	0
CS2	22	2	normal	normal	1	1	1	Med	5	>3	0	0	0		Occasional	0	Never	No	20	0			0	2	0	1	0	0	1	0
CS2	22	2	normal	normal	2	2	1	Med	4	>3	0	0	0		Occasional	0	Never	No	11	0			0	2	0	1	0	0	1	0
CS2	22	2	normal	normal	2	2	1	Med	4	>3	0	1	0		Occasional	0	Never	No	28	0			0	1	1	1	0	0	1	0
CS2	22	2	normal	normal	1	3	1	Med	4	>3	0	0	0		Occasional	0	Never	No	17	0			0	2	0	1	0	0	1	0
CS2	22	2	normal	normal	2	2	1	Med	4	>3	1	0	0	1	Occasional	0	Occasional	No	20	0			0	2	1	1	0	0	1	0
CS2	22	2	normal	normal	2	2	1	Med	5	>3	0	0	0		Occasional	0	Occasional	No	31	0			1	2	1	1	0	0	1	0
CS2	22	2	normal	normal	2	2	1	Med	3	3	0	0	0		Occasional	0	Occasional	No	5	0			0	1	0	1	0	0	1	0
CS2	22	2	normal	normal	1	2	1	Med	5	>3	0	0	0		Occasional	0	Occasional	No	13	0			0	2	0	1	0	0	1	0
CS2	22	2	normal	normal	2	2	1	Med	4	>3	0	0	0		Occasional	0	Occasional	No	23	0			0	2	0	1	0	0	1	0
CS2	22	2	normal	normal	1	2	1	Med	5	>3	0	0	0		Occasional	0	Occasional	Occasional	22	0			1	2	1	1	0	0	1	0
CS2	22	1	normal	normal	1	2	1	Med	4	>3	0	0	0		Occasional	0	Occasional	Occasional	17	0			0	2	0	1	0	0	1	0
CS2	22	2	normal	normal	1	2	1	Med	5	>3	0	0	0		Occasional	1	Occasional	No	6	0			0	1	0	1	0	0	1	0
CS2	22	1	normal	normal	1	2	1	Med	2	2	1	0	1	20	Occasional	0	Never	No	5	0			0	2	0	2	1	0	1	0
CS2	22	1	normal	normal	1	2	1	Med	4	>3	0	0	1	3	Occasional	1	Never	Occasional	0	0			0	2	0	2	1	0	1	0
CS2	22	1	overweight	overweight	2	2	1	Med	5	>3	0	0	0		Occasional	1	Occasional	Occasional	5	0			0	2	0	2	0	0	1	1
CS2	22	1	normal	normal	2	2	1	Med	4	>3	0	0	1	20	Occasional	1	Occasional	Occasional	15	0			1	2	0	2	1	0	1	0
CS2	22	1	normal	normal		2	1	Med	4	>3	1	0	0		Frequent	0	Frequent	No	16	0			0	2	1	2	0	1	1	0
CS2	22	1	normal	normal	2	2	1	Med	5	>3	0	1	0		Frequent	0	Frequent	Occasional	2	0			0	2	0	2	0	1	1	0
CS2	22	1	normal	normal	2	2	1	Med	5	>3	0	0	0		Frequent	0	Occasional	No	17	0			0	2	0	2	0	1	1	0
CS2	22	1	normal	normal	2	2	1	Med	4	>3	0	1	0		Frequent	0	Occasional	Occasional	22	0			0	2	1	2	0	1	1	0
CS2	22	2	normal	normal	2	2	1	Med	2	2	0	0	0		Frequent	0	Occasional	Occasional	15	0			0	2	0	2	0	1	1	0
CS2	22	2	normal	normal	1	2	1	Med	5	>3	0	0	0		Frequent	1	Occasional	Occasional	12	0			0	2	0	2	0	1	1	0
CS2	22	1	overweight	overweight	2	2	1	Med	4	>3	1	1	1	7	Occasional	0	Occasional	No	9	0			0	1	0	3	1	0	1	1
CS2	22	2	normal	normal	1	2	1	Med	3	3	1	0	1	15	Occasional	1	Frequent	Occasional	10	0			1	2	0	3	1	1	1	0
CS2	22	1	normal	normal	2	2	1	Med	3	3	1	0	1	15	Occasional	1	Frequent	Regular	16	0			0	2	0	3	1	1	1	0
CS2	22	1	overweight	overweight	2	2	1	Med	4	>3	0	0	1	5	Occasional	1	Occasional	Occasional	10	0			0	2	0	3	1	0	1	1
CS2	22	1	normal	normal	2	2	1	Med	3	3	0	0	1	10	Frequent	0	Occasional	No	5	0			0	1	0	3	1	1	1	0
CS2	22	2	normal	normal	2	2	1	Med	2	2	1	0	1	6	Frequent	0	Occasional	Occasional	12	0			0	2	1	3	1	1	1	0
CS2	22	1	normal	normal	1	2	1	Med	3	3	0	1	1	20	Frequent	1	Frequent	Regular	14	0			0	3	0	3	1	1	1	0
CS2	22	1			1	2	1	Med	4	>3	0	0	0		Never	0	Never	No	22	0			0	2	0	1	0	0	1
CS2	22	1	normal	normal	2	2	1	Med	4	>3	0	0	1	2	Frequent	0	Never	No	15	0			0	2	0	3	1	1	1	0
CS2	23	1	normal	normal	1	1	1	Med	5	>3	0	1	0		Occasional	0	Never	No	3	0			0	2	0	1	0	0	1	0
CS2	23	2	normal	normal	2	2	1	Med	5	>3	1	1	0		Occasional	0	Never	No	12	0			0	2	0	1	0	0	1	0
CS2	23	1	normal	normal	1	3	1	Med	4	>3	0	1	0		Occasional	1	Occasional	No	20	0			0	3	0	1	0	0	1	0
CS2	23	1	normal	normal	2	2	1	Med	5	>3	0	1	0		Occasional	0	Never	No	9	0			0	2	1	1	0	0	1	0
CS2	23	2	normal	normal	1	2	1	Med	5	>3	0	1	0		Occasional	0	Occasional	No	27	0			0	2	0	1	0	0	1	0
CS2	23	1	normal	normal	1	2	1	Med	4	>3	0	0	0		Occasional	0	Occasional	Occasional	18	0			0	2	1	1	0	0	1	0
CS2	23	2	normal	normal	2	2	1	Med	5	>3	0	0	0		Occasional	1	Occasional	Occasional	23	0			0	2	0	1	0	0	1	0
CS2	23	2	normal	normal	2	2	1	Med	5	>3	0	0	1	7	Occasional	0	Never	No	16	0			0	2	0	2	1	0	1	0
CS2	23	2	normal	normal	2	2	1	Med	5	>3	0	0	1	10	Occasional	0	Never	No	15	0			0	2	0	2	1	0	1	0
CS2	23	1	normal	normal	2	2	1	Med	3	3	0	0	1	10	Occasional	0	Occasional	Occasional	24	0			0	2	1	2	1	0	1	0
CS2	23	1	normal	normal	2	2	1	Med	4	>3	0	0	1	20	Occasional	0	Occasional	Occasional	23	0			0	1	0	2	1	0	1	0
CS2	23	1	normal	normal	1	1	1	Med	4	>3	1	0	1	8	Occasional	0	Occasional	Occasional	19	0			0	3	0	2	1	0	1	0
CS2	23	1	normal	normal	2	2	1	Med	5	>3	0	1	1	3	Occasional	1	Occasional	No	7	0			0	2	0	2	1	0	1	0
CS2	23	2	normal	normal	1	2	1	Med	5	>3	1	0	1	7	Occasional	1	Occasional	Occasional	13	0			1	2	1	2	1	0	1	0
CS2	23	2	underweight	maigreur	2	2	1	Med	4	>3	1	0	0		Frequent	0	Occasional	No	9	0			0	1	0	2	0	1	1	0
CS2	23	2	normal	normal	2	2	1	Med	5	>3	0	0	0		Frequent	0	Occasional	No	13	0			0	2	0	2	0	1	1	0
CS2	23	1	normal	normal	2	2	1	Med	5	>3	1	0	1		Occasional	1	Frequent	Occasional	11	0			0	3	1	3	1	1	1	0
CS2	23	2	underweight	maigreur	2	2	1	Med	5	>3	1	0	1	7	Frequent	0	Occasional	Occasional	6	0			0	2	1	3	1	1	1	0
CS2	23	1	overweight	overweight	1	1	1	Med	5	>3	0	0	0		Never	0	Never	No	15	0			0	3	0	2	0	0	1	1
CS2	23	1	overweight	overweight	1	1	1	Med	4	>3	1	0	0		Never	0	Never	No	13	0			0	1	0	2	0	0	1	1
CS2	24	1	underweight	maigreur	1	1	1	Med	4	>3	1	0	0		Occasional	0	Never	No	25	0			0	2	0	1	0	0	1	0
CS2	24	1			1	1	1	Med	5	>3	0	0	0		Occasional	0	Never	No	13	0			0	2	1	1	0	0	1
CS2	24	2	normal	normal	1	2	1	Med	5	>3	0	0	0		Occasional	0	Occasional	No	24	0			0	2	1	1	0	0	1	0
CS2	24	2	normal	normal	1	2	1	Med	4	>3	1	0	0		Occasional	0	Occasional	No	17	0			0	2	1	1	0	0	1	0
CS2	24	2	normal	normal	2	2	1	Med	5	>3	0	0	0		Occasional	1	Never	No	13	0			0	2	1	1	0	0	1	0
CS2	24	1	normal	normal	2	2	1	Med	5	>3	0	1	0		Occasional	1	Occasional	Occasional	13	0			0	2	0	1	0	0	1	0
CS2	24	2	normal	normal	2	1	1	Med	3	3	0	0	1	2	Occasional	0	Never	Occasional	14	0			0	2	0	2	1	0	1	0
CS2	24	2	normal	normal	1	1	1	Med	5	>3	0	0	1	5	Occasional	0	Occasional	No	8	0			0	1	0	2	1	0	1	0
CS2	24	2	normal	normal	1	2	1	Med	5	>3	0	1	1	5	Occasional	0	Occasional	No	4	0			0	2	0	2	1	0	1	0
CS2	24	2	overweight	overweight	2	2	1	Med	5	>3	0	0	1	20	Occasional	0	Occasional	No	18	0			0	3	0	3	1	0	1	1
CS2	24	1	normal	normal	1	2	1	Med	4	>3	0	0	1	1	Frequent	0	Frequent	Occasional	14	0			0	1	1	3	1	1	1	0
CS2	24	2	normal	normal	2	2	1	Med	4	>3	0	0	1	15	Frequent	0	Occasional	No	18	0			1	2	1	3	1	1	1	0
CS2	24	2	underweight	maigreur	1	1	1	Med	4	>3	0	1	0		Never	0	Never	No	24	0			0	3	1	1	0	0	1	0
CS2	24	1	overweight	overweight	2	2	1	Med	5	>3	0	0	0		Occasional	0	Occasional	No	10	0				2	0	2	0	0	1	1
CS2	25	1	normal	normal	2	1	1	Med	4	>3	1	0	0		Occasional	0	Occasional	Occasional	19	0			0	2	1	1	0	0	1	0
CS2	25	2	normal	normal	2	2	1	Med	5	>3	0	0	0		Occasional	0	Occasional	No	21	0			0	2	1	1	0	0	1	0
CS2	25	1	normal	normal	2	2	1	Med	5	>3	1	0	1	10	Frequent	1	Occasional	Occasional	8	0			0	2	0	3	1	1	1	0
CS2	28	1			2	2	1	Med	5	>3	1	1	1	0.5	Occasional	1	Occasional	Occasional	11	0	1	2	1	2	0	2	1	0	1
CS2	20	2	normal	normal	1	3	1	Med	3	3	0	0	0		Occasional	0	Never	No	20						0	0	0	0		0
CS2	20	2	normal	normal	2	2	1	Med	3	3	0	0	0		Occasional	0	Occasional	No	4						0	0	0	0		0
CS2	20	2	normal	normal	2	1	1	Med	2	2	1	0	1	2	Occasional	0	Occasional	Occasional	2						0	1	1	0		0
CS2	20	2	normal	normal	1	2	1	Med	2	2	0	1	0		Frequent	1	Frequent	No	15						0	2	0	1	1	0
CS2	20	1	overweight	overweight	1	1	1	Med	2	2	0	1	0		Never	0	Never	No							0	1	0	0		1
CS2	21	1	normal	normal	1	2	1	Med	3	3	1	1	0		Occasional	0	Never	No	10						0	0	0	0		0
CS2	21	2	underweight	maigreur	2	2	1	Med	4	>3	1	0	0		Occasional	0	Occasional	No	9						0	0	0	0		0
CS2	21	2	normal	normal	2	2	1	Med	4	>3	0	0	0		Occasional	1	Occasional	No	6						0	0	0	0		0
CS2	21	1	normal	normal	1	1	1	Med	3	3	1	0	0		Occasional	1	Occasional	No							0	0	0	0		0
CS2	21	2	normal	normal	2	1	1	Med	2	2	0	0	1	2	Frequent	1	Frequent	No	5						0	2	1	1		0
CS2	21	2			1	2	1	Med	4	>3	0	0	0		Occasional	0	Occasional	No	2						0	0	0	0
CS2	22	1	normal	normal	1	2	1	Med	5	>3	0	0	0		Occasional	0	Occasional	Occasional							0	0	0	0		0
CS2	22	2	normal	normal	1	2	1	Med	3	3	0	0	0		Occasional	1	Occasional	Occasional							0	0	0	0		0
CS2	22	2	underweight	maigreur	2	2	1	Med	3	3	0	0	1	3	Never	0	Never	No							0	1	1	0		0
CS2	23	1	overweight	overweight	2	2	1	Med	5	>3	0	0	0		Occasional	0	Occasional	No	11						0	1	0	0		1
CS2	23	1	normal	normal	1	2	1	Med	3	3	0	0	0		Frequent	0	Occasional	No	9				0		0	1	0	1		0
CS2	24	1	overweight	overweight	2	2	1	Med	5	>3	0	0	0		Occasional	1	Occasional	No	9						0	1	0	0		1
CS1	18	2	underweight	maigreur	1	2	2	Pharma	2	2	1	0	0		Occasional	0	Never	No	13	1	1	2	0	2	1	0	0	0	0	0
CS1	19	2	normal	normal	1	1	2	Pharma	2	2	0	0	0		Occasional	0	Never	No	14	1	1	2	0	2	1	0	0	0	0	0
CS1	19	2	normal	normal	1	2	2	Pharma	2	2	0	0	0		Occasional	0	Never	No	15	1	2	3	0	2	0	0	0	0	0	0
CS1	19	2	normal	normal	1	2	2	Pharma	2	2	0	0	0		Occasional	0	Never	No	10	1	1	1	0	2	0	0	0	0	0	0
CS1	19	2	normal	normal	1	1	2	Pharma	2	2	0	0	0		Occasional	0	Occasional	No	6	1	1	1	0	1	1	0	0	0	0	0
CS1	19	2	normal	normal	2	2	2	Pharma	2	2	1	0	0		Occasional	0	Occasional	No	4	1	1	2	0	1	0	0	0	0	0	0
CS1	19	2	normal	normal	1	1	2	Pharma	2	2	1	0	0		Occasional	0	Occasional	No	18	1	>3	1	0	2	1	0	0	0	0	0
CS1	19	2	normal	normal	1	2	2	Pharma	2	2	1	0	0		Occasional	1	Occasional	No	11	1	1	1	0	2	0	0	0	0	0	0
CS1	19	1	normal	normal	1	1	2	Pharma	2	2	0	0	0		Occasional	1	Occasional	Occasional	12	1	2	2	0	2	0	0	0	0	0	0
CS1	19	1	normal	normal	1	1	2	Pharma	2	2	1	0	0		Frequent	1	Frequent	Occasional	9	1	1	3	0	1	0	1	0	1	0	0
CS1	19	1	normal	normal	1	2	2	Pharma	2	2	0	0	0		Frequent	1	Frequent	Regular	18	1	2	2	1	3	1	1	0	1	0	0	moyen
CS1	19	2	normal	normal	2	2	2	Pharma	2	2	0	0	1	5	Frequent	0	Frequent	Regular	8	1	1	3	0	2	1	2	1	1	0	0
CS1	19	1	normal	normal	1	1	2	Pharma	3	3	0	0	0		Never	0	Never	No	14	1	1	3	0	2	0	0	0	0	0	0
CS1	20	2	normal	normal	1	2	2	Pharma	3	3	0	0	0		Occasional	0	Never	No	23	1	1	3	0	2	1	0	0	0	0	0
CS1	20	2	normal	normal	1	1	2	Pharma	3	3	1	0	0		Occasional	0	Never	No	5	1	>3	1	0	2	0	0	0	0	0	0
CS1	20	2	underweight	maigreur	2	3	2	Pharma	2	2	0	0	0		Occasional	0	Never	No	11	1	1	2	0	2	1	0	0	0	0	0
CS1	20	2	underweight	maigreur	1	2	2	Pharma	3	3	1	0	0		Occasional	0	Never	No	6	1	2	3	1	1	1	0	0	0	0	0
CS1	20	2	normal	normal	1	1	2	Pharma	2	2	0	0	0		Occasional	0	Never	No	16	1	1	1	0	2	0	0	0	0	0	0
CS1	20	2	normal	normal	2	1	2	Pharma	3	3	0	0	0		Occasional	0	Never	No	17	1	2	2	1	2	1	0	0	0	0	0
CS1	20	2			2	1	2	Pharma	3	3	0	0	0		Occasional	0	Never	No	11	1	1	2	1	1	1	0	0	0	0
CS1	20	1	normal	normal	1	2	2	Pharma	3	3	1	0	0		Occasional	0	Never	Regular	2	1	1	2	0	2	0	0	0	0	0	0
CS1	20	1	normal	normal	1	2	2	Pharma	2	2	0	0	0		Occasional	0	Occasional	No	26	1	2	3	0	2	0	0	0	0	0	0
CS1	20	1	normal	normal	2	1	2	Pharma	3	3	1	0	0		Occasional	0	Occasional	Occasional	11	1	2	2	0	1	0	0	0	0	0	0
CS1	20	1	normal	normal	1	1	2	Pharma	2	2	0	0	0		Occasional	0	Occasional	Occasional	11	1	2	1	0	2	0	0	0	0	0	0
CS1	20	2			1	1	2	Pharma	2	2	0	0	0		Occasional	0	Occasional	Occasional	20	1	1	2	0	2	1	0	0	0	0
CS1	20	1	normal	normal	1	1	2	Pharma	3	3	1	0	0		Occasional	1	Occasional	No	16	1	1	3	0	2	0	0	0	0	0	0
CS1	20	1	normal	normal		3	2	Pharma	2	2	1	0	0		Occasional	1	Occasional	No	4	1	>3	3	0	1	0	0	0	0	0	0
CS1	20	1	normal	normal	1	2	2	Pharma	3	3	0	0	0		Occasional	1	Occasional	Occasional	7	1	2	2	0	2	0	0	0	0	0	0
CS1	20	2	overweight	overweight	2	1	2	Pharma	3	3	1	1	0		Occasional	0	Never	No	22	1	2	2	0	1	0	1	0	0	0	1
CS1	20	2	normal	normal	2	1	2	Pharma	2	2	0	0	1	9	Occasional	1	Occasional	Occasional	18	1	2	1	1	2	0	1	1	0	0	0
CS1	20	1	normal	normal	1	3	2	Pharma	2	2	0	0	1	10	Occasional	1	Frequent	Occasional	17	1	1	3	1	2	1	2	1	1	0	0
CS1	21	1	normal	normal	1	2	2	Pharma	3	3	0	0	0		Occasional	0	Never	No	18	1	1	3	0	2	0	0	0	0	0	0
CS1	21	2	normal	normal	2	2	2	Pharma	3	3	0	0	0		Occasional	0	Occasional	No	19	1	1	3	1	2	0	0	0	0	0	0
CS1	21	2	normal	normal	2	1	2	Pharma	3	3	0	0	0		Occasional	0	Never	No	8	1	1	2	0	2	0	0	0	0	0	0
CS1	21	2	normal	normal	2	2	2	Pharma	3	3	0	0	0		Occasional	0	Never	No	21	1	1	2	0	2	0	0	0	0	0	0
CS1	21	2	normal	normal	1	1	2	Pharma	3	3	0	1	0		Occasional	0	Never	No	14	1	1	3	0	2	0	0	0	0	0	0
CS1	21	2	normal	normal	1	1	2	Pharma	3	3	0	1	0		Occasional	0	Never	No	18	1	2	1	1	2	1	0	0	0	0	0
CS1	21	2	normal	normal	2	1	2	Pharma	3	3	1	0	0		Occasional	0	Never	No	9	1	2	2	0	2	0	0	0	0	0	0
CS1	21	2	normal	normal	2	2	2	Pharma	3	3	1	0	0		Occasional	0	Never	No	9	1	2	2	0	2	0	0	0	0	0	0
CS1	21	2	normal	normal	1	1	2	Pharma	4	>3	1	0	0		Occasional	0	Never	No	21	1	3	2	0	2	0	0	0	0	0	0
CS1	21	2	normal	normal	1	2	2	Pharma	4	>3	0	0	0		Occasional	0	Occasional	No	12	1	1	2	0	1	0	0	0	0	0	0
CS1	21	2	normal	normal	1	2	2	Pharma	4	>3	1	0	0		Occasional	0	Occasional	No	22	1	2	3	1	2	0	0	0	0	0	0
CS1	21	1	normal	normal	2	3	2	Pharma	4	>3	1	1	0		Occasional	0	Occasional	Occasional	5	1	2	2	0	2	1	0	0	0	0	0
CS1	21	1	normal	normal	1	1	2	Pharma	2	2	0	0	0		Occasional	0	Occasional	Occasional	16	1	3	3	0	2	0	0	0	0	0	0
CS1	21	1	normal	normal	2	2	2	Pharma	2	2	0	0	0		Occasional	1	Occasional	No	15	1	1	3	0	1	1	0	0	0	0	0
CS1	21	2	normal	normal	1	1	2	Pharma	2	2	0	0	0		Occasional	1	Occasional	Occasional	25	1	3	2	1	2	1	0	0	0	0	0
CS1	21	2	overweight	overweight	1	2	2	Pharma	3	3	0	1	0		Occasional	0	Never	No	20	1	1	2	0	2	0	1	0	0	0	1
CS1	21	1	overweight	overweight	2	1	2	Pharma	3	3	1	0	0		Occasional	0	Never	No	7	1	>3	3	0	1	0	1	0	0	0	1
CS1	21	2	normal	normal	1	2	2	Pharma	2	2	0	0	1	15	Occasional	0	Never	No	20	1	1	3	0	2	1	1	1	0	0	0
CS1	21	2	underweight	maigreur	2	2	2	Pharma	3	3	1	0	1	2	Occasional	0	Occasional	No		1	1	2	0	2	1	1	1	0	0	0
CS1	21	1	normal	normal	2	1	2	Pharma	2	2	0	0	1	5	Occasional	1	Occasional	Occasional	21	1	2	3	1	2	1	1	1	0	0	0
CS1	21	1	normal	normal	1	1	2	Pharma	2	2	1	0	0		Frequent	0	Frequent	No	9	1	3	3	0	2	0	1	0	1	0	0
CS1	21	1	normal	normal	1	1	2	Pharma	4	>3	0	0	0		Frequent	1	Frequent	Occasional	15	1	3	3	1	2	0	1	0	1	0	0
CS1	21	1	normal	normal	2	2	2	Pharma	2	2	0	0	0		Frequent	1	Occasional	Occasional	27	1	1	2	0	2	1	1	0	1	0	0
CS1	21	1	normal	normal	2	1	2	Pharma	3	3	1	0	0		Frequent		Frequent	Occasional	3	1	1	2	0	2	0	1	0	1	0	0
CS1	21	1	normal	normal	1	2	2	Pharma	4	>3	0	0	1	6	Frequent	0	Frequent	Occasional	7	1	2	1	0	2	0	2	1	1	0	0
CS1	21	2	normal	normal	1	2	2	Pharma	3	3	0	0	0		Never	0	Never	No	21	1	1	3	1	2	1	0	0	0	0	0
CS1	21	1	normal	normal	1	2	2	Pharma	2	2	0	0	0		Never	0	Never	No	6	1	2	2	1	2	0	0	0	0	0	0
CS1	21	1	overweight	overweight	1	1	2	Pharma	4	>3	1	0	0		Never	0	Never	No	20	1	2	2	0	2	0	1	0	0	0	1
CS1	21	1	normal	normal	1	1	2	Pharma	3	3	0	1	1	10	Never	0	Never	No	27	1	3	3	1	2	0	1	1	0	0	0
CS1	21	2	overweight	overweight	2	2	2	Pharma	2	2	0	0	0		Never	0	Never	Occasional	29	1	>3	1	1	3	0	1	0	0	0	1
CS1	22	2	normal	normal	1	2	2	Pharma	4	>3	1		0		Occasional	0	Never	No	24	1	2	2	0	2	0	0	0	0	0	0
CS1	22	2	normal	normal	1	1	2	Pharma	4	>3	0	0	1	7	Occasional	0	Occasional	No	28	1	3	2	1	3	0	1	1	0	0	0
CS1	22	2	underweight	maigreur	2	2	2	Pharma	5	>3	0	0	0		Occasional	0	Never	No	7	1	2	3	0	2	0	0	0	0	0	0
CS1	22	2	normal	normal	2	2	2	Pharma	3	3	0	0	0		Occasional	0	Never	No	6	1	2	2	0	2	0	0	0	0	0	0
CS1	22	2	normal	normal	2	2	2	Pharma	4	>3	1	0	0		Occasional	0	Occasional	No	5	1	1	2	0	2	0	0	0	0	0	0
CS1	22	1	normal	normal	2	2	2	Pharma	4	>3	0	1	0		Occasional	0	Occasional	No	23	1	1	3	0	2	0	0	0	0	0	0
CS1	22	2	normal	normal	2	2	2	Pharma	5	>3	1	0	0		Occasional	0	Occasional	No	12	1	1	2	0	2	1	0	0	0	0	0
CS1	22	2	normal	normal	2	2	2	Pharma	4	>3	0	0	0		Occasional	0	Occasional	No	27	1	3	2	0	2	0	0	0	0	0	0
CS1	22	2	normal	normal	1	2	2	Pharma	4	>3	0	0	0		Occasional	0	Occasional	No	8	1	3	2	1	2	0	0	0	0	0	0
CS1	22	2	normal	normal	2	1	2	Pharma	3	3	0	0	0		Occasional	0	Occasional	No	8	1	>3	3	0	1	0	0	0	0	0	0
CS1	22	1	normal	normal	1	1	2	Pharma	4	>3	0	0	0		Occasional	0	Occasional	No	8	1	>3	1	0	1	0	0	0	0	0	0
CS1	22	1	normal	normal	1	1	2	Pharma	3	3	0	0	0		Occasional	0	Occasional	Occasional	10	1	1	1	0	2	1	0	0	0	0	0
CS1	22	2	normal	normal	1	2	2	Pharma	4	>3	0	0	0		Occasional	0	Occasional	Occasional	8	1	1	2	1	2	0	0	0	0	0	0
CS1	22	2	normal	normal	1	2	2	Pharma	4	>3	1	0	0		Occasional	1	Occasional	No	24	1	2	2	1	2	1	0	0	0	0	0
CS1	22	2	overweight	overweight	1	2	2	Pharma	3	3	0	0	0		Occasional	0	Never	No	14	1	1	3	0	2	1	1	0	0	0	1
CS1	22	2	normal	normal	1	1	2	Pharma	3	3	1	0	1	1	Occasional	0	Occasional	No	8	1	3	3	0	2	1	1	1	0	0	0
CS1	22	2	normal	normal	2	2	2	Pharma	3	3	1	0	1	5	Occasional	0	Occasional	No		1	>3	1	0	2	1	1	1	0	0	0
CS1	22	1	normal	normal	2	2	2	Pharma	3	3	0	0	0		Frequent	0	Frequent	Occasional	6	1	1	2	0	2	0	1	0	1	0	0
CS1	22	1	normal	normal	1	2	2	Pharma	2	2	0	0	0		Frequent	0	Occasional	No	23	1	1	3	0	3	1	1	0	1	0	0
CS1	22	1	normal	normal	1	1	2	Pharma	4	>3	1	0	0		Frequent	0	Occasional	Occasional	20	1	1	1	0	2	1	1	0	1	0	0
CS1	22	1	normal	normal	2	2	2	Pharma	3	3	1	0	0		Frequent	1	Frequent	No	4	1	2	3	0	1	0	1	0	1	0	0
CS1	22	1	normal	normal	2	2	2	Pharma	4	>3	1	0	0		Frequent	1	Occasional	No	16	1	3	2	0	2	0	1	0	1	0	0
CS1	22	1	normal	normal	2	1	2	Pharma	2	2	0	0	0		Frequent	1	Occasional	Occasional	3	1	1	2	0	2	0	1	0	1	0	0
CS1	22	1	normal	normal	1	3	2	Pharma	2	2	1	1	1	15	Occasional	1	Frequent	Regular	18	1	1	3	0	3	0	2	1	1	0	0
CS1	22	1	normal	normal	1	2	2	Pharma	3	3	1	0	1	10	Frequent	0	Occasional	No	7	1	1	3	0	2	1	2	1	1	0	0
CS1	22	2	normal	normal	1	2	2	Pharma	3	3	1	0	1	15	Frequent	0	Occasional	No	16	1	2	3	1	1	0	2	1	1	0	0
CS1	22	1	normal	normal	1	2	2	Pharma	3	3	1	0	1	4	Frequent	0	Occasional	Occasional	11	1	1	2	0	2	0	2	1	1	0	0
CS1	22	2	normal	normal	2	2	2	Pharma	4	>3	1	0	1	2	Frequent	0	Occasional	Occasional	8	1	2	3	0	1	0	2	1	1	0	0
CS1	22	1	normal	normal	1	2	2	Pharma	2	2	0	0	1	1	Frequent	0	Occasional	Regular	11	1	1	2	0	2	0	2	1	1	0	0
CS1	22	1	normal	normal	2	2	2	Pharma	4	>3	0		1	4	Frequent	1	Frequent	Occasional	16	1	1	3	0	2	0	2	1	1	0	0
CS1	22	2	normal	normal	2	2	2	Pharma	3	3	1	0	0		Occasional	0	Never	No	2	1	1	1	0	1	0	0	0	0	0	0
CS1	22	1	normal	normal	2	3	2	Pharma	4	>3	0	1	0		Never	0	Occasional	Occasional	7	1	1	2	0	2	0	1	0	1	0	0
CS1	23	1	normal	normal	1	2	2	Pharma	3	3	1	0	0		Occasional	0	Never	No	19	1	2	3	1	2	1	0	0	0	0	0
CS1	23	1	normal	normal	2	2	2	Pharma	3	3	0	1	0		Occasional	0	Never	No	11	1	3	3	0	2	0	0	0	0	0	0
CS1	23	2	normal	normal	2	2	2	Pharma	5	>3	1	0	0		Occasional	0	Occasional	No	13	1	2	2	0	1	0	0	0	0	0	0
CS1	23	2	normal	normal	2	2	2	Pharma	4	>3	1	0	0		Occasional	0	Never	No	28	1	2	3	1	3	0	0	0	0	0	0
CS1	23	1	normal	normal	1	3	2	Pharma	5	>3	1	1	0		Occasional	0	Never	No	12	1	2	3	0	2	0	0	0	0	0	0
CS1	23	2	underweight	maigreur	2	2	2	Pharma	4	>3	1	0	0		Occasional	0	Occasional	No	14	1	2	2	0	2	0	0	0	0	0	0
CS1	23	2	normal	normal	1	1	2	Pharma	5	>3	1	0	0		Occasional	0	Occasional	No	15	1	1	3	1	2	0	0	0	0	0	0
CS1	23	2	normal	normal	1	2	2	Pharma	4	>3	0	0	0		Occasional	0	Occasional	No	21	1	2	1	0	2	1	0	0	0	0	0
CS1	23	1	normal	normal	1	2	2	Pharma	5	>3	0	0	0		Occasional	0	Occasional	No	10	1	2	2	0	2	0	0	0	0	0	0
CS1	23	1	normal	normal	1	1	2	Pharma	2	2	1	0	0		Occasional	1	Occasional	No	23	1	1	3	0	2	0	0	0	0	0	0
CS1	23	1	normal	normal	1	1	2	Pharma	2	2	1	1	0		Occasional	1	Occasional	Occasional	10	1	3	2	0	2	0	0	0	0	0	0
CS1	23	2	normal	normal	2	2	2	Pharma	5	>3	0	0	0		Frequent	0	Never	No	12	1	1	3	0	2	1	1	0	1	0	0
CS1	23	2	normal	normal	2	2	2	Pharma	4	>3	1	0	1	3	Occasional	0	Occasional	No	16	1	1	2	1	2	1	1	1	0	0	0
CS1	23	2	normal	normal	1	2	2	Pharma	3	3	0	0	1	5	Occasional	0	Occasional	No	12	1	>3	1	1	1	0	1	1	0	0	0
CS1	23	2	normal	normal	1	2	2	Pharma	3	3	0	0	0		Frequent	1	Frequent	No	15	1	3	2	1	2	1	1	0	1	0	0
CS1	23	2	normal	normal	2	2	2	Pharma	3	3	1	0	1	5	Frequent	0	Frequent	No	9	1	1	2	1	2	1	2	1	1	0	0
CS1	23	2	normal	normal	2	2	2	Pharma	3	3	1	0	1		Frequent	1	Occasional	Occasional	9	1	2	1	0	1	0	2	1	1	0	0
CS1	23	1	overweight	overweight	1	2	2	Pharma	3	3	1	1	1	20	Occasional	1	Frequent	Regular	24	1	1	2	0	3	0	3	1	1	0	1
CS1	23	2	normal	normal	1	1	2	Pharma	5	>3	0	0	0		Never	0	Never	No	18	1	1	3	1	2	1	0	0	0	0	0
CS1	24	2	normal	normal	2	2	2	Pharma	5	>3	1	0	1	10	Occasional	0	Occasional	No	11	1	1	2	0	2	0	1	1	0	0	0
CS1	24	2	normal	normal	1	1	2	Pharma	4	>3	0	0	0		Occasional	0	Never	No	31	1	2	2	1	2	1	0	0	0	0	0
CS1	24	2	normal	normal	1	2	2	Pharma	5	>3	1	0	0		Occasional	0	Occasional	No	26	1	1	2	1	2	1	0	0	0	0	0
CS1	24	2	underweight	maigreur	2	2	2	Pharma	4	>3	0	0	0		Occasional	1	Occasional	No	21	1	1	3	0	2	0	0	0	0	0	0
CS1	24	2	normal	normal	1	2	2	Pharma	5	>3	1	1	0		Occasional		Never	No	12	1	1	2	0	2	0	0	0	0	0	0
CS1	24	2	overweight	overweight	2	2	2	Pharma	5	>3	1	0	0		Occasional	0	Occasional	No	15	1	1	2	0	2	0	1	0	0	0	1
CS1	24	2	normal	normal	1	2	2	Pharma	5	>3	1	1	1	13	Occasional	0	Occasional	No	15	1	3	3	0	1	0	1	1	0	0	0
CS1	24	1	normal	normal	1	2	2	Pharma	3	3	0	1	0		Frequent	0	Occasional	No	5	1	2	3	0	2	1	1	0	1	0	0
CS1	24	1	normal	normal	1	2	2	Pharma	2	2	1	1	0		Frequent	1	Occasional	Occasional	17	1	>3	2	0	2	0	1	0	1	0	0
CS1	24	2	normal	normal	1	2	2	Pharma	4	>3	1	0	0		Frequent		Frequent	No	18	1	1	2	0	2	1	1	0	1	0	0
CS1	24	2	normal	normal	2	2	2	Pharma	5	>3	1	0	1	10	Frequent	1	Frequent	No	10	1	2	2	1	1	1	2	1	1	0	0
CS1	25	2	normal	normal	1	2	2	Pharma	5	>3	1	1	0		Occasional	0	Never	No	18	1	1	2	0	2	0	0	0	0	0	0
CS1	25	1	normal	normal	1	3	2	Pharma	4	>3	1	1	0		Occasional	0	Occasional	No	12	1	1	3	0	2	1	0	0	0	0	0
CS1	25	2	normal	normal	2	2	2	Pharma	3	3	1	0	0		Occasional	0	Occasional	No	14	1	2	2	1	2	1	0	0	0	0	0
CS1	25	2	normal	normal	2	2	2	Pharma	5	>3	1	0	0		Occasional	0	Occasional	No	17	1	2	2	1	2	0	0	0	0	0	0
CS1	25	2	normal	normal	2	2	2	Pharma	4	>3	1	0	0		Occasional	0	Occasional	No	10	1	1	2	1	2	0	0	0	0	0	0
CS1	25	2	normal	normal	1	2	2	Pharma	3	3	1	0	0		Occasional	1	Occasional	No	16	1	2	1	1	2	0	0	0	0	0	0
CS1	25	1	normal	normal	1	2	2	Pharma	4	>3	1	0	0		Occasional	1	Occasional	No	7	1	2	3	0	2	1	0	0	0	0	0
CS1	25	2	obesity	overweight	2	1	2	Pharma	4	>3	1	0	0		Occasional	0	Occasional	No	7	1	1	2	1	3	0	1	0	0	0	1
CS1	25	2	underweight	maigreur	1	1	2	Pharma	3	3	1	0	1	2	Occasional	0	Occasional	No	8	1	2	2	0	2	0	1	1	0	0	0
CS1	25	1	normal	normal	1	2	2	Pharma	4	>3	1	0	1	20	Occasional	1	Occasional	Regular	11	1	>3	3	0	2	0	1	1	0	0	0
CS1	25	1	overweight	overweight	2	1	2	Pharma	4	>3	1	1	0		Frequent	0	Frequent	Occasional	8	1	3	3	0	2	1	2	0	1	0	1
CS1	25	1	normal	normal	1	1	2	Pharma	3	3	1	0	1	10	Frequent	0	Frequent	Occasional	9	1	2	2	0	2	1	2	1	1	0	0
CS1	26	1	normal	normal	2	2	2	Pharma	5	>3	1	0	0		Occasional	1	Occasional	No	13	1	2	3	0	2	0	0	0	0	0	0
CS1	26	1	overweight	overweight	1	2	2	Pharma	5	>3	1	0	0		Occasional	0	Occasional	No	4	1	1	2	0	2	0	1	0	0	0	1
CS1	26	1	normal	normal	1	2	2	Pharma	4	>3	1	0	1	12	Occasional	0	Occasional	Occasional	6	1	1	2	0	2	0	1	1	0	0	0
CS1	26	1	normal	normal	1	2	2	Pharma	5	>3	0	0	1	10	Occasional	1	Occasional	No	14	1	3	2	0	2	0	1	1	0	0	0
CS1	19	2	normal	normal	2	1	2	Pharma	2	2	1	0	0		Occasional	0	Never	No	7	0			0	2	1	1	0	0	1	0
CS1	19	2	underweight	maigreur	1	1	2	Pharma	2	2	0	0	0		Occasional	0	Never	No	14	0			0	2	0	1	0	0	1	0
CS1	19	2	normal	normal	2	1	2	Pharma	2	2	0	1	0		Occasional	0	Never	No	13	0			0	2	0	1	0	0	1	0
CS1	19	2	normal	normal	1	2	2	Pharma	3	3	0	0	0		Occasional	0	Occasional	No	12	0			0	2	1	1	0	0	1	0
CS1	19	2	normal	normal	2	2	2	Pharma	2	2	0	0	0		Occasional	0	Occasional	No		0			0	2	0	1	0	0	1	0
CS1	19	2	normal	normal	2	1	2	Pharma	2	2	0	0	0		Occasional	0	Occasional	No	14	0			0	2	0	1	0	0	1	0
CS1	19	1	normal	normal	1	1	2	Pharma	2	2	0	0	0		Occasional	0	Occasional	No	18	0			0	2	0	1	0	0	1	0
CS1	19	2	normal	normal	1	1	2	Pharma	2	2	0	0	0		Occasional	1	Occasional	Occasional	21	0			1	2	0	1	0	0	1	0
CS1	19	2	normal	normal	1	2	2	Pharma	2	2	0	0	0		Occasional	1	Occasional	Occasional		0			0	2	0	1	0	0	1	0
CS1	19	2	normal	normal	1	2	2	Pharma	2	2	0	0	0		Never	0	Never	No	9	0			0	2	0	1	0	0	1	0
CS1	20	2	normal	normal	1	1	2	Pharma	4	>3	1	0	0		Frequent	0	Never	No	18	0			0	2	1	2	0	1	1	0
CS1	20	1	normal	normal	1	2	2	Pharma	2	2	1	1	0		Occasional	0	Never	No	17	0			0	2	1	1	0	0	1	0
CS1	20	2	normal	normal	1	2	2	Pharma	2	2	0	0	0		Occasional	0	Occasional	No	17	0			1	2	1	1	0	0	1	0
CS1	20	2	normal	normal	1	2	2	Pharma	2	2	0	0	0		Occasional	0	Occasional	No	25	0			0	2	0	1	0	0	1	0
CS1	20	2	normal	normal	1	2	2	Pharma	2	2	0	1	0		Occasional	0	Occasional	No	16	0			0	2	0	1	0	0	1	0
CS1	20	2	normal	normal	1	2	2	Pharma	3	3	0	0	0		Occasional	0	Occasional	Occasional	23	0			0	2	0	1	0	0	1	0
CS1	20	2	normal	normal	2	1	2	Pharma	3	3	1	0	0		Occasional	1	Occasional	No	6	0			0	2	1	1	0	0	1	0
CS1	20	1	normal	normal	1	1	2	Pharma	2	2	0	0	0		Occasional	1	Occasional	No	27	0			0	3	1	1	0	0	1	0
CS1	20	1	normal	normal	1	2	2	Pharma	3	3			0		Occasional	1	Occasional	Occasional	12	0			0	2	1	1	0	0	1	0
CS1	20	2	normal	normal	2	2	2	Pharma	3	3	0	0	1	17	Occasional	0	Never	No	20	0			0	3	1	2	1	0	1	0
CS1	20	2	overweight	overweight	2	1	2	Pharma	2	2	0	0	0		Occasional	0	Occasional	No	24	0			0	2	0	2	0	0	1	1
CS1	20	2			2	2	2	Pharma	3	3	0	0	1	3	Occasional	0	Occasional	Occasional	11	0			0	2	0	2	1	0	1
CS1	20	2	normal	normal	2	2	2	Pharma	2	2	0	1	0		Frequent	1	Frequent	No	1	0			0	2	0	2	0	1	1	0
CS1	20	2	underweight	maigreur	1	1	2	Pharma	2	2	0	0	0		Never	0	Never	No		0						1	0	0	1	0
CS1	20	2	normal	normal	1	1	2	Pharma	3	3	0	0	0		Never	0	Never	No	24	0			0	2	0	1	0	0	1	0
CS1	21	2	normal	normal	2	2	2	Pharma	4	>3	0	0	0		Occasional	0	Never	No	13	0			0	2	0	1	0	0	1	0
CS1	21	2	normal	normal	1	2	2	Pharma	3	3	0	1	0		Occasional	0	Occasional	No	19	0			0	1	0	1	0	0	1	0
CS1	21	2	underweight	maigreur	2	2	2	Pharma	4	>3	0	0	0		Occasional	1	Occasional	No	15	0			0	2	1	1	0	0	1	0
CS1	21	2			1	2	2	Pharma	2	2	1	1	0		Occasional	1	Occasional	No	22	0			1	2	1	1	0	0	1
CS1	21	2	normal	normal	2	2	2	Pharma	2	2	0	0	0		Occasional	1	Occasional	Occasional	22	0			0	3	1	1	0	0	1	0
CS1	21	1	overweight	overweight	1	2	2	Pharma	2	2	0	0	0		Occasional	1	Occasional	No	3	0			0	2	0	2	0	0	1	1
CS1	21	1	overweight	overweight	1	2	2	Pharma	2	2	0	1	0		Occasional	1	Occasional	Occasional	12	0			0	2	0	2	0	0	1	1
CS1	21	2	overweight	overweight	1	1	2	Pharma	2	2	0	1	0		Occasional	1	Occasional	Occasional	11	0			0	2	0	2	0	0	1	1
CS1	21	1	normal	normal	1	1	2	Pharma	3	3	1	0	0		Frequent	0	Frequent	Occasional	2	0			0	2	0	2	0	1	1	0
CS1	21	2	normal	normal	1	2	2	Pharma	3	3	1	0	1	10	Frequent	0	Occasional	Occasional	22	0			1	3	1	3	1	1	1	0
CS1	22	2	normal	normal	2	2	2	Pharma	1	1	0	1	1	7	Occasional	0	Occasional	Occasional	21	0			0	2	1	2	1	0	1	0
CS1	22	2	normal	normal	2	2	2	Pharma	3	3	0	1	0		Occasional	0	Never	No	13	0			0	2	0	1	0	0	1	0
CS1	22	2	normal	normal	2	2	2	Pharma	4	>3	1	0	0		Occasional	0	Never	No	13	0			0	1	0	1	0	0	1	0
CS1	22	2	normal	normal	1	2	2	Pharma	4	>3	0	0	0		Occasional	0	Never	No	16	0			0	2	0	1	0	0	1	0
CS1	22	2	normal	normal	1	1	2	Pharma	4	>3	1	0	0		Occasional	0	Never	No	32	0			1	1	0	1	0	0	1	0
CS1	22	2	normal	normal	2	2	2	Pharma	3	3	0	0	0		Occasional	0	Occasional	No	17	0			0	2	0	1	0	0	1	0
CS1	22	1	normal	normal	2	2	2	Pharma	4	>3	0	0	0		Occasional	1	Occasional	No	13	0			0	2	1	1	0	0	1	0
CS1	22	2	normal	normal	2	2	2	Pharma	2	2	0	0	0		Occasional	1	Occasional	Regular	17	0			0	2	0	1	0	0	1	0
CS1	22	2	overweight	overweight	1	2	2	Pharma	4	>3	0	0	0		Occasional	0	Occasional	No	23	0			0	2	1	2	0	0	1	1
CS1	22	2	normal	normal	2	2	2	Pharma	4	>3	1	0	1	15	Occasional	0	Occasional	No	20	0			0	3	0	2	1	0	1	0
CS1	22	2	normal	normal	2	2	2	Pharma	4	>3	1	0	0		Occasional	1	Frequent	No	4	0			0	2	0	2	0	1	1	0
CS1	22	2	normal	normal	2	2	2	Pharma	3	3	0	0	1	15	Frequent	0	Frequent	Occasional	20	0			0	2	0	3	1	1	1	0
CS1	22	2	normal	normal	1	2	2	Pharma	4	>3	0	0	0		Never	0	Never	No	22	0			0	2	0	1	0	0	1	0
CS1	22	2	overweight	overweight	1	1	2	Pharma	3	3	0	1	0		Never	0	Never	No	7	0			0	2	0	2	0	0	1	1
CS1	23	2	underweight	maigreur	1	3	2	Pharma	4	>3	0	0	0		Occasional	0	Never	No	17	0			0	1	0	1	0	0	1	0
CS1	23	2	underweight	maigreur	1	3	2	Pharma	4	>3	1	0	0		Occasional	0	Never	No	20	0			0	2	1	1	0	0	1	0
CS1	23	2	normal	normal	1	2	2	Pharma	3	3	0	0	0		Occasional	0	Never	No	7	0			0	2	0	1	0	0	1	0
CS1	23	2	normal	normal	2	3	2	Pharma	4	>3	1	1	0		Occasional	0	Never	No	27	0			0	3	1	1	0	0	1	0
CS1	23	2	normal	normal	1	2	2	Pharma	3	3	1	0	0		Never	0	Never	No	11	0			0	2	0	1	0	0	1	0
CS1	23	2	normal	normal	1	1	2	Pharma	4	>3	0	1	0		Never	0	Never	No	23	0			0	2	0	1	0	0	1	0
CS1	23	2	normal	normal	1	2	2	Pharma	4	>3	1	0	0		Never	0	Never	No	18	0			0	3	0	1	0	0	1	0
CS1	24	2	obesity	overweight	1	2	2	Pharma	4	>3	0	0	0		Occasional	0	Never	No	20	0			1	3	0	2	0	0	1	1
CS1	24	1	overweight	overweight	1	1	2	Pharma	3	3	0	0	0		Occasional	0	Occasional	No	24	0			0	2	1	2	0	0	1	1
CS1	25	2	normal	normal	1	1	2	Pharma	5	>3	1	0	0		Occasional	0	Occasional	No	9	0			0	2	0	1	0	0	1	0
CS1	25	1	obesity	overweight	1	3	2	Pharma	4	>3	1	1	0		Never	0	Never	No	23	0			1	3	0	2	0	0	1	1
CS1	26	2	normal	normal	2	2	2	Pharma	5	>3	1	0	0		Occasional	0	Never	No	16	0			1	2	1	1	0	0	1	0
CS1	27	1	normal	normal	2	2	2	Pharma	5	>3	1	0	0		Never	1	Never	No		0			0	2	0	1	0	0	1	0
CS1	20	2	normal	normal	1	1	2	Pharma	2	2	0	0	0		Occasional	0	Never	No	17							0	0	0		0
CS1	20	2	normal	normal	1	1	2	Pharma	2	2	0	0	0		Occasional	0	Never	No	35							0	0	0		0
CS1	20	1	normal	normal	2	1	2	Pharma	2	2	0	0	0		Occasional	1	Occasional	No								0	0	0		0
CS1	20	2	normal	normal	1	1	2	Pharma	2	2	0	0	0		Never	0	Never	No	10							0	0	0		0
CS1	21	2	normal	normal	2	2	2	Pharma	4	>3	0	0	0		Occasional	0	Never	Occasional	12							0	0	0		0
CS1	21	2	normal	normal	1	2	2	Pharma	3	3	0	0	0		Occasional	0	Occasional	No	24							0	0	0		0
CS1	21	2	normal	normal	1	2	2	Pharma	3	3	0	0	0		Occasional	0	Occasional	No								0	0	0		0
CS1	21	1	normal	normal	2	2	2	Pharma	4	>3	1	0	0		Occasional	0	Occasional	No								0	0	0		0
CS1	21	2	underweight	maigreur	1	2	2	Pharma	4	>3	1	0	0		Occasional	1	Occasional	No	19							0	0	0		0
CS1	21	2	normal	normal	1	1	2	Pharma	2	2	1	0	0		Occasional	1	Occasional	No	18							0	0	0		0
CS1	21	2	normal	normal	1	1	2	Pharma	4	>3	1	0	0		Frequent	0	Occasional	No	8							1	0	1		0
CS1	21	1	normal	normal	2	2	2	Pharma	4	>3	1	0	0		Frequent	0	Occasional	Occasional	4							1	0	1		0	risque
CS1	22	2	normal	normal	1	2	2	Pharma	2	2		0	0		Occasional	0	Never	No	8							0	0	0		0
CS1	22	2			2	2	2	Pharma	2	2	1	0	0		Occasional	0	Occasional	No	27							0	0	0
CS1	22	1	normal	normal	1	3	2	Pharma	3	3	1	0	0		Occasional	1	Occasional	No	18							0	0	0		0
CS1	22	2	normal	normal	1	2	2	Pharma	3	3	1	0	1	2	Occasional	1	Occasional	No	11							1	1	0		0
CS1	22	2	normal	normal		2	2	Pharma	4	>3	1	0	0		Frequent	0	Occasional	No	9							1	0	1		0
CS1	23	2	normal	normal	2	1	2	Pharma	4	>3		0	0		Occasional	0	Occasional									0	0	0		0
CS1	23	1	normal	normal	2	2	2	Pharma	4	>3	0	0	0		Occasional	1	Occasional	No								0	0	0		0
CS1	24	1	normal	normal	2	2	2	Pharma	4	>3	1	0	0		Occasional	0	Never	No								0	0	0		0
CS1	24	2	underweight	maigreur	1	2	2	Pharma	5	>3	1	0	0		Occasional	0	Occasional	Occasional	25							0	0	0		0
CS1	25	2	normal	normal	1	2	2	Pharma	5	>3	0	1	0		Occasional	0	Never	No	33							0	0	0		0
CS1	25	2	normal	normal	1	2	2	Pharma	5	>3	0	1	0		Occasional	0	Never	No	22							0	0	0		0
CS1	25	1	overweight	overweight	2	2	2	Pharma	3	3			0		Occasional	0	Occasional	No	7							1	0	0		1
CS2	18	2	normal	normal	2	3	2	Pharma	2	2	0	1	0		Occasional	0	Occasional	No	22	1	2	3	0	2	0	0	0	0	0	0
CS2	19	2	normal	normal	2	2	2	Pharma	2	2	0	0	0		Occasional	0	Never	No	15	1	1	3	0	1	0	0	0	0	0	0
CS2	20	2	normal	normal	2	3	2	Pharma	2	2	0	0	0		Occasional	0	Never	No	16	1	1	3	1	2	0	0	0	0	0	0
CS2	20	2	normal	normal	1	3	2	Pharma	2	2	1	0	0		Occasional	0	Never	No	6	1	1	3	0	1	0	0	0	0	0	0
CS2	20	2	normal	normal	2	1	2	Pharma	2	2	1	1	0		Occasional	0	Never	No	21	1	2	2	0	2	1	0	0	0	0	0
CS2	20	2	normal	normal	2	2	2	Pharma	2	2	0	1	0		Occasional	0	Never	No	9	1	2	1	1	2	1	0	0	0	0	0
CS2	20	2	normal	normal	2	1	2	Pharma	3	3	1	1	0		Occasional	0	Never	No	28	1	>3	2	1	2	1	0	0	0	0	0
CS2	20	2	normal	normal	2	2	2	Pharma	3	3	0	0	0		Occasional	0	Occasional	No	12	1	1	2	0	2	0	0	0	0	0	0
CS2	20	2	normal	normal	1	1	2	Pharma	2	2	0	0	0		Occasional	0	Occasional	No	7	1	3	2	0	2	0	0	0	0	0	0
CS2	20	2	normal	normal	2	2	2	Pharma	2	2	1	1	0		Occasional	0	Occasional	Occasional	19	1	1	2	1	2	0	0	0	0	0	0
CS2	20	2	normal	normal	2	3	2	Pharma	2	2	1	0	0		Occasional	1	Never	No	14	1	>3	2	1	1	1	0	0	0	0	0
CS2	20	2	normal	normal	1	3	2	Pharma	3	3	0	0	0		Occasional	1	Occasional	No	14	1	1	2	0	2	0	0	0	0	0	0
CS2	20	2	normal	normal	1	2	2	Pharma	2	2	0	0	0		Occasional	1	Occasional	No	16	1	1	2	1	1	0	0	0	0	0	0
CS2	20	1	normal	normal	1	1	2	Pharma	3	3	1	1	0		Occasional	1	Frequent	No	9	1	1	2	0	1	0	1	0	1	0	0
CS2	20	2	normal	normal	2	2	2	Pharma	2	2	1	1	1	5	Occasional	1	Occasional	No	15	1	1	2	0	2	0	1	1	0	0	0
CS2	20	2	underweight	maigreur	1	1	2	Pharma	2	2	1	0	0		Frequent	0	Occasional	No	16	1	3	2	1	2	0	1	0	1	0	0
CS2	20	1	normal	normal	2	2	2	Pharma	3	3	1	0	0		Frequent	0	Occasional	No	18	1	1	2	0	2	1	1	0	1	0	0
CS2	20	2	normal	normal	2	1	2	Pharma	3	3	1	0	0		Frequent	0	Occasional	No	25	1	2	2	1	2	0	1	0	1	0	0
CS2	20	1	normal	normal	2	2	2	Pharma	2	2	0	0	0		Frequent	0	Occasional	Occasional	15	1	3	3	0	1	0	1	0	1	0	0
CS2	20	1	normal	normal	1	1	2	Pharma	3	3	0	0	0		Frequent	1	Frequent	Occasional	13	1	2	2	0	2	0	1	0	1	0	0
CS2	20	2	normal	normal	1	2	2	Pharma	2	2	0	0	1	6	Frequent	1	Frequent	Occasional	14	1	2	3	1	1	0	2	1	1	0	0
CS2	20	2	normal	normal	2	2	2	Pharma	2	2	0	1	0		Never	0	Never	No	20	1	3	2	0	2	0	0	0	0	0	0
CS2	21	2	underweight	maigreur	2	2	2	Pharma	4	>3	0	0	0		Occasional	0	Never	No	12	1	3	1	0	2	0	0	0	0	0	0
CS2	21	2	normal	normal	2	2	2	Pharma	2	2	0	0	0		Occasional	0	Never	No	6	1	3	2	0	1	0	0	0	0	0	0
CS2	21	2	normal	normal	1	2	2	Pharma	2	2	0	0	0		Occasional	0	Occasional	No	30	1	1	3	0	2	1	0	0	0	0	0
CS2	21	2	normal	normal	1	1	2	Pharma	3	3	0	1	0		Occasional	0	Occasional	No	22	1	1	2	1	2	0	0	0	0	0	0
CS2	21	2	normal	normal	1	2	2	Pharma	5	>3	1	0	0		Occasional	0	Occasional	No	16	1	1	3	0	2	1	0	0	0	0	0
CS2	21	1	normal	normal	2	2	2	Pharma	3	3	0	0	0		Occasional	0	Occasional	Occasional	8	1	1	2	0	1	0	0	0	0	0	0
CS2	21	1	normal	normal	2	2	2	Pharma	5	>3	1	0	0		Occasional	1	Never	No	2	1	>3	2	0	1	1	0	0	0	0	0
CS2	21	1	normal	normal	2	2	2	Pharma	4	>3	0	0	0		Occasional	1	Occasional	No	13	1	1	2	0	1	0	0	0	0	0	0
CS2	21	2	normal	normal	1		2	Pharma	2	2	0	0	0		Occasional	1	Occasional	No	30	1	3	2	1	2	0	0	0	0	0	0
CS2	21	2	normal	normal	1	2	2	Pharma	2	2	0	0	0		Occasional	1	Occasional	Occasional	15	1	2	1	0	2	0	0	0	0	0	0
CS2	21	2	overweight	overweight	1	2	2	Pharma	3	3	0	0	0		Occasional	0	Never	No	29	1	1	3	0	3	0	1	0	0	0	1
CS2	21	2	overweight	overweight	2	2	2	Pharma	3	3	0	0	0		Occasional	0	Occasional	No	6	1	1	2	1	2	0	1	0	0	0	1
CS2	21	2	normal	normal	1	2	2	Pharma	3	3	1	1	1	2	Occasional	0	Occasional	No	19	1	2	1	0	2	0	1	1	0	0	0
CS2	21	1	normal	normal	1	2	2	Pharma	4	>3	0	0	1	10	Occasional	1	Occasional	Occasional	21	1	3	3	1	3	0	1	1	0	0	0
CS2	21	1	normal	normal	1	1	2	Pharma	3	3	0	0	0		Frequent	0	Frequent	No	12	1	3	2	0	2	0	1	0	1	0	0
CS2	21	1	normal	normal	2	1	2	Pharma	4	>3	0	1	0		Frequent	0	Occasional	No	3	1	>3	2	0	2	0	1	0	1	0	0
CS2	21	1	normal	normal	2	2	2	Pharma	3	3	1	0	0		Frequent	0	Occasional	Occasional	10	1	2	1	0	2	0	1	0	1	0	0
CS2	21	1	normal	normal	1	2	2	Pharma	2	2	0	0	0		Frequent	1	Frequent	No	16	1	>3	2	0	1	1	1	0	1	0	0
CS2	21	1	normal	normal	2	2	2	Pharma	2	2	1	0	0		Frequent	1	Frequent	Occasional	28	1	>3	3	1	2	1	1	0	1	0	0
CS2	21	2	normal	normal	1	2	2	Pharma	3	3	1	0	0		Frequent	1	Occasional	No	16	1	1	2	0	2	0	1	0	1	0	0
CS2	21	2	normal	normal	1	2	2	Pharma	3	3	0	0	0		Frequent	1	Occasional	No	19	1	3	1	1	1	0	1	0	1	0	0
CS2	21	1	normal	normal	2	2	2	Pharma	2	2	0	0	1	6	Frequent	1	Frequent	Occasional	18	1	3	2	1	3	0	2	1	1	0	0
CS2	21	2			2	1	2	Pharma	3	3	1	0	1	5	Frequent	1	Never	No	13	1	2	2	0	2	0	2	1	1	0
CS2	21	2	overweight	overweight	2	2	2	Pharma	2	2	0	0	0		Frequent	1	Occasional	No	16	1	1	1	0	1	0	2	0	1	0	1
CS2	21	1	normal	normal	2	1	2	Pharma	2	2	1	0	1	0.15	Frequent	1	Occasional	Occasional	0	1	1	1	0	2	0	2	1	1	0	0
CS2	21	2	overweight	overweight	2	2	2	Pharma	3	3	0	1	1	10	Never	0	Never	No	13	1	2	2	0	2	1	2	1	0	0	1
CS2	22	2	normal	normal	2	2	2	Pharma	5	>3	0	0	0		Occasional	0	Never	No	15	1	2	2	0	2	0	0	0	0	0	0
CS2	22	1	normal	normal	1	2	2	Pharma	2	2	0	0	0		Occasional	0	Never	No	11	1	1	2	0	2	0	0	0	0	0	0
CS2	22	1	normal	normal	2	1	2	Pharma	3	3	0	0	0		Occasional	0	Occasional	No	19	1	1	1	0	2	0	0	0	0	0	0
CS2	22	2	normal	normal	1	3	2	Pharma	3	3	1	1	0		Occasional	0	Occasional	No	26	1	1	2	0	2	1	0	0	0	0	0
CS2	22	2	normal	normal	2	2	2	Pharma	3	3	1	0	0		Occasional	0	Occasional	No	24	1	2	2	0	2	1	0	0	0	0	0
CS2	22	2	normal	normal	2	1	2	Pharma	3	3	0	0	0		Occasional	0	Occasional	No	3	1	2	2	0	2	0	0	0	0	0	0
CS2	22	1	normal	normal	1	2	2	Pharma	4	>3	0	0	0		Occasional	0	Occasional	No	2	1	2	2	0	1	0	0	0	0	0	0
CS2	22	2	normal	normal	2	2	2	Pharma	4	>3	1	0	0		Occasional	0	Occasional	No	9	1	2	2	0	1	0	0	0	0	0	0
CS2	22	2	normal	normal	2	1	2	Pharma	3	3	0	0	0		Occasional	0	Occasional	No	26	1	3	3	0	2	0	0	0	0	0	0
CS2	22	1	normal	normal	1	2	2	Pharma	4	>3	0	0	0		Occasional	1	Never	No	26	1	2	3	1	2	1	0	0	0	0	0
CS2	22	2	normal	normal	2	2	2	Pharma	4	>3	1	1	0		Occasional	1	Occasional	Occasional	17	1	1	3	0	2	0	0	0	0	0	0
CS2	22	2	normal	normal	1	2	2	Pharma	3	3	0	0	0		Occasional	0	Frequent	No	7	1	>3	3	0	1	0	1	0	1	0	0
CS2	22	1	overweight	overweight	2	2	2	Pharma	5	>3	1	0	0		Occasional	0	Occasional	No	5	1	2	2	0	2	0	1	0	0	0	1
CS2	22	2	overweight	overweight	1	2	2	Pharma	3	3	0	0	0		Occasional	1	Occasional	No	13	1	>3	2	0	2	0	1	0	0	0	1
CS2	22	1	normal	normal	2	2	2	Pharma	2	2	0	0	0		Frequent	0	Occasional	No	16	1	>3	3	0	2	0	1	0	1	0	0
CS2	22	1	normal	normal	1	2	2	Pharma	3	3	0	1	0		Frequent	1	Frequent	Occasional	12	1	3	3	0	2	0	1	0	1	0	0
CS2	22	1	underweight	maigreur	1	2	2	Pharma	3	3	1	0	1	6	Occasional	1	Frequent	Occasional	12	1	3	1	0	2	0	2	1	1	0	0
CS2	22	2	normal	normal	1	1	2	Pharma	3	3	1	0	0		Never	0	Never	No	23	1	1	2	0	1	1	0	0	0	0	0
CS2	23	2	normal	normal	2	2	2	Pharma	5	>3	1	0	0		Occasional	0	Occasional	No	9	1	3	2	0	2	0	0	0	0	0	0
CS2	23	2	normal	normal	1	1	2	Pharma	5	>3	1	0	0		Occasional	0	Occasional	No	11	1	1	2	1	1	1	0	0	0	0	0
CS2	23	2	normal	normal	2	2	2	Pharma	5	>3	1	0	0		Occasional	0	Occasional	No	14	1	1	3	0	2	0	0	0	0	0	0
CS2	23	2	normal	normal	2	2	2	Pharma	5	>3	1	0	0		Occasional	0	Occasional	No	15	1	2	2	1	2	0	0	0	0	0	0
CS2	23	1	normal	normal	2	2	2	Pharma	5	>3	1	0	0		Occasional	0	Occasional	No	8	1	3	2	0	1	0	0	0	0	0	0
CS2	23	2	normal	normal	2	3	2	Pharma	5	>3	0	1	0		Occasional		Never	No	14	1	1	2	0	2	1	0	0	0	0	0
CS2	23	2	overweight	overweight	2	2	2	Pharma	2	2	0	0	0		Occasional	0	Never	No	17	1	2	3	0	2	1	1	0	0	0	1
CS2	23	2	underweight	maigreur	1	2	2	Pharma	5	>3	1	0	1	3	Occasional	0	Occasional	No	15	1	2	1	0	2	0	1	1	0	0	0
CS2	23	1	overweight	overweight	2	2	2	Pharma	4	>3	0	0	0		Occasional	1	Never	No	13	1	2	3	0	2	0	1	0	0	0	1
CS2	23	2	overweight	overweight	1	2	2	Pharma	5	>3	0	1	0		Occasional	1	Occasional	No	28	1	1	2	1	2	1	1	0	0	0	1
CS2	23	1	normal	normal	2	2	2	Pharma	3	3	1	0	1	15	Occasional	1	Frequent	Occasional	9	1	2	2	0	2	0	2	1	1	0	0
CS2	23	2	normal	normal	2	2	2	Pharma	2	2	1	0	1	6	Frequent	1	Frequent	Occasional	12	1	2	1	1	2	0	2	1	1	0	0
CS2	23	1	underweight	maigreur	2	2	2	Pharma	5	>3	0	0	0		Never	0	Never	No	10	1	1	1	0	3	1	0	0	0	0	0
CS2	23	2	normal	normal	2	2	2	Pharma	5	>3	1	0	0		Never	0	Never	No	21	1	2	3	1	3	0	0	0	0	0	0
CS2	23	2	normal	normal	2	2	2	Pharma	3	3	1	1	0		Never	0	Never	No	12	1	2	2	0	2	0	0	0	0	0	0
CS2	23	2	normal	normal	2	1	2	Pharma	2	2	0	0	0		Occasional	0	Occasional	No	20	1	2	3		3	0	0	0	0	0	0
CS2	24	2	normal	normal	1	1	2	Pharma	5	>3	1	0	0		Occasional	0	Occasional	No	15	1	2	2	0	2	0	0	0	0	0	0
CS2	24	1	normal	normal	1	1	2	Pharma	2	2	1	0	0		Occasional	0	Occasional	No	21	1	2	3	0	2	0	0	0	0	0	0
CS2	24	1	normal	normal	1	2	2	Pharma	5	>3	1	1	0		Occasional	0	Occasional	No	12	1	3	1	0	2	0	0	0	0	0	0
CS2	24	2	overweight	overweight	1	2	2	Pharma	5	>3	0	0	0		Occasional	0	Occasional	No	23	1	2	2	0	2	1	1	0	0	0	1
CS2	24	2	normal	normal	2	2	2	Pharma	5	>3	1	0	0		Frequent	0	Occasional	No	11	1	1	2	1	1	0	1	0	1	0	0
CS2	24	1	normal	normal	2	1	2	Pharma	5	>3	1	0	0		Frequent	0	Occasional	No	7	1	>3	2	0	2	1	1	0	1	0	0
CS2	24	1	normal	normal	2	1	2	Pharma	4	>3	1	1	1	17	Frequent	1	Frequent	Occasional	8	1	1	2	0	2	0	2	1	1	0	0
CS2	25	2	normal	normal	2	1	2	Pharma	5	>3	1	0	0		Occasional	0	Occasional	No	14	1	2	2	0	2	0	0	0	0	0	0
CS2	25	1	normal	normal	1	2	2	Pharma	5	>3	1	1	0		Occasional	0	Occasional	No	4	1	3	2	0	2	1	0	0	0	0	0
CS2	25	1	normal	normal	1	2	2	Pharma	3	3	1	1	1	10	Frequent	0	Occasional	Occasional	9	1	>3	1	0	2	0	2	1	1	0	0
CS2	25	2	normal	normal	2	2	2	Pharma	5	>3	1	0	1	1	Never	0	Never	No	8	1	3	1	0	2	0	1	1	0	0	0
CS2	26	2	normal	normal	2	2	2	Pharma	5	>3	1	0	0		Occasional	1	Occasional	No	5	1	2	2	1	2	1	0	0	0	0	0
CS2	27	1	normal	normal		2	2	Pharma	4	>3	1	0	1	5	Occasional	0	Frequent	No	12	1	1	2	0	2	0	2	1	1	0	0
CS2	19	2	underweight	maigreur	2	2	2	Pharma	2	2	1	1	0		Occasional	0	Occasional	No	15	0			0	2	0	1	0	0	1	0
CS2	19	1	overweight	overweight	2	3	2	Pharma	2	2	0	1	0		Occasional	0	Occasional	Occasional	7	0			0	2	0	2	0	0	1	1
CS2	20	1	normal	normal	1	2	2	Pharma	2	2	0	0	0		Occasional	0	Never	No	14	0			0	2	0	1	0	0	1	0
CS2	20	2	normal	normal	2	2	2	Pharma	2	2	0	0	0		Occasional	0	Never	No	12	0			0	2	0	1	0	0	1	0
CS2	20	2	normal	normal	2	1	2	Pharma	3	3	0	0	0		Occasional	0	Never	No	11	0			0	2	0	1	0	0	1	0
CS2	20	2	underweight	maigreur	2	1	2	Pharma	2	2	1	0	0		Occasional	0	Occasional	No	7	0			0	2	0	1	0	0	1	0
CS2	20	2	normal	normal	1	1	2	Pharma	3	3	0	1	0		Occasional	0	Occasional	No	17	0			1	2	0	1	0	0	1	0
CS2	20	2	normal	normal	1	2	2	Pharma	2	2	1	0	0		Occasional	1	Occasional	No	12	0			0	2	0	1	0	0	1	0
CS2	20	1	normal	normal	1		2	Pharma	3	3	1	1	0		Occasional		Occasional	No	21	0			0	2	1	1	0	0	1	0
CS2	20	1	normal	normal	1	3	2	Pharma	2	2	1	0	0		Occasional	1	Frequent	Occasional	20	0			1	2	0	2	0	1	1	0
CS2	20	2	normal	normal		2	2	Pharma	2	2	0	0	0		Frequent	0	Occasional	No	21	0			1	2	1	2	0	1	1	0
CS2	20	2	normal	normal	2	2	2	Pharma	3	3	1	0	0		Never	0	Never	No	14	0			0	2	1	1	0	0	1	0
CS2	21	2	normal	normal	2	1	2	Pharma	4	>3	1	0	0		Occasional	0	Never	No	16	0			0	2	0	1	0	0	1	0
CS2	21	2	normal	normal	2	1	2	Pharma	2	2	0	0	0				Never	No	25	0			0	2	1	1	0	0	1	0
CS2	21	2	normal	normal	2	2	2	Pharma	3	3	0	1	0		Occasional	0	Never	No	20	0			0	2	1	1	0	0	1	0
CS2	21	2	normal	normal	2	1	2	Pharma	3	3	0	0	0		Occasional	0	Never	No	26	0			1	2	1	1	0	0	1	0
CS2	21	2	normal	normal	2	2	2	Pharma	2	2	0	1	0		Occasional	0	Occasional	No	12	0			0	2	0	1	0	0	1	0
CS2	21	1	normal	normal	2	2	2	Pharma	2	2	0	1	0		Occasional	1	Occasional	Occasional	6	0			0	1	0	1	0	0	1	0
CS2	22	2	normal	normal	2	1	2	Pharma	3	3	0	0	0		Occasional	0	Never	No	23	0			0	2	0	1	0	0	1	0
CS2	22	1	obesity	overweight	1	3	2	Pharma	4	>3	0	1	0		Occasional	0	Never	No	28	0			0	2	0	2	0	0	1	1
CS2	22	1	normal	normal	2	2	2	Pharma	4	>3	0	0	1	20	Occasional	0	Occasional	Occasional	8	0			0	2	0	2	1	0	1	0
CS2	22	2	underweight	maigreur		2	2	Pharma	3	3	0	1	1	2			Occasional	Occasional	21	0			0	2	1	2	1	0	1	0
CS2	22	2	normal	normal	2	2	2	Pharma	3	3	0	0	1	5	Frequent	1	Frequent	Occasional	2	0			0	1	0	3	1	1	1	0
CS2	23	2	normal	normal	1	1	2	Pharma	5	>3	1	0	0		Occasional	0	Never	No	15	0			0	2	0	1	0	0	1	0
CS2	23	2	normal	normal	2	1	2	Pharma	5	>3	0	0	0		Occasional	0	Occasional	No	8	0			0	2	1	1	0	0	1	0
CS2	23	2	normal	normal	2	2	2	Pharma	5	>3	1	0	0		Occasional	0	Occasional	No	10	0			0	2	0	1	0	0	1	0
CS2	23	1	normal	normal	2	1	2	Pharma	4	>3	0	0	0		Occasional	0	Occasional	No	26	0			0	3	1	1	0	0	1	0
CS2	23	2	normal	normal	1	2	2	Pharma	5	>3	1	0	0		Occasional	0	Occasional	No	17	0			0	2	0	1	0	0	1	0
CS2	23	1	normal	normal	1	2	2	Pharma	5	>3	0	0	0		Occasional	0	Occasional	No	6	0			0	2	0	1	0	0	1	0
CS2	23	1	normal	normal	1	2	2	Pharma	3	3	0	0	1	15	Frequent	1	Occasional	Regular	6	0			0	2	0	3	1	1	1	0
CS2	23	2	normal	normal	2	2	2	Pharma	2	2	1	0	0		Never	0	Never	No	22	0			0	2	0	1	0	0	1	0
CS2	23	1	obesity	overweight	1	2	2	Pharma	4	>3	1	1	0		Never	0	Never	No	17	0			0	2	0	2	0	0	1	1
CS2	23	1	obesity	overweight	1	1	2	Pharma	3	3	1	1	0		Never	0	Never	No	16	0			0	3	1	2	0	0	1	1
CS2	24	2	underweight	maigreur	2	2	2	Pharma	5	>3	1	0	1	10	Occasional	0	Never	No	13	0			0	2	0	2	1	0	1	0
CS2	24	2	normal	normal	1	1	2	Pharma	5	>3	1	1	0		Never	0	Never	No	21	0			1	2	0	1	0	0	1	0
CS2	25	2	normal	normal	1	2	2	Pharma	5	>3	1	0	0		Occasional	0	Never	No	2	0			0	2	0	1	0	0	1	0
CS2	27	1	normal	normal	2	1	2	Pharma	5	>3	0	0	0		Occasional	0	Occasional	No	3	0			0	1	0	1	0	0	1	0
CS2	21	2	normal	normal	2	3	2	Pharma	2	2	1	1	0		Occasional	0	Never	No							0	0	0	0		0
CS2	21	2	normal	normal	1	1	2	Pharma	2	2	0	0	0		Occasional	1	Never	Occasional	17						0	0	0	0		0
CS2	22	2	normal	normal	1	1	2	Pharma	4	>3	1	0	0		Occasional	0	Occasional	No	31						0	0	0	0		0
CS2	23	2	normal	normal	2	2	2	Pharma	5	>3		0	0		Occasional	0	Occasional	No	15						1	0	0	0		0
CS2	23	1	overweight	overweight	2	1	2	Pharma	2	2	0	0	0		Occasional	1	Frequent	Occasional	6						0	2	0	1	0	1
CS1	23	1	normal	normal	2	2	3	Physio	3	3	0	0	0		Frequent	0	Frequent	Occasional	10	1	2	3	0	2	0	1	0	1	0	0
CS1	23	1	normal	normal	2	2	3	Physio	3	3	0	0	0		Frequent	1	Frequent	Occasional	15	1	2	3	1	2	0	1	0	1	0	0
CS1	23	2	normal	normal	2	1	3	Physio	1	1	0	0	0		Frequent	1	Occasional	Occasional	10	1	1	3	0	2	1	1	0	1	0	0
CS1	23	1	overweight	overweight	1	2	3	Physio	3	3	1	0	1	20	Frequent	1	Occasional	Occasional	16	1	1	3	0	2	0	3	1	1	0	1
CS1	24	2	normal	normal	1	2	3	Physio	3	3	0	0	0		Occasional	0	Occasional	No	7	1	1	3	0	2	0	0	0	0	0	0
CS1	24	2	underweight	maigreur	2	2	3	Physio	1	1	1	1	0		Frequent	1	Occasional	Regular	18	1	3	3	0	1	0	1	0	1	0	0
CS1	20	2	normal	normal	2	2	3	Physio	1	1	0	0	0		Occasional	1	Occasional	Occasional	6	0			1	2	1	1	0	0	1	0
CS1	20	1	normal	normal	2	2	3	Physio	1	1	0	0	0		Occasional	1	Occasional	Occasional	9	0			0	2	0	1	0	0	1	0
CS1	20	1	normal	normal	2	2	3	Physio	2	2	0	0	0		Occasional	1	Occasional	Occasional	15	0			1	2	0	1	0	0	1	0
CS1	20	2	normal	normal	1	1	3	Physio	1	1	0	0	0		Frequent	0	Occasional	No	8	0			0	2	1	2	0	1	1	0
CS1	21	2	normal	normal	1	2	3	Physio	1	1	0	1	0		Occasional	0	Never	No	15	0			0	3	1	1	0	0	1	0
CS1	21	2	normal	normal	1	2	3	Physio	1	1	0	0	0		Occasional	1	Occasional	Occasional	12	0			0	2	0	1	0	0	1	0
CS1	21	2	normal	normal	1	2	3	Physio	1	1	0	0	1	10	Occasional	0	Never	Occasional	11	0			0	2	0	2	1	0	1	0
CS1	21	2	normal	normal	2	2	3	Physio	2	2	0	0	1	10	Occasional	0	Occasional	Occasional	31	0			1	3	1	2	1	0	1	0
CS1	21	2			2	2	3	Physio	2	2	1	1	1	20	Frequent	0	Occasional	No	17	0			1	2	1	3	1	1	1
CS1	22	2	normal	normal	2	1	3	Physio	1	1	1	0	0		Occasional	0	Occasional	Occasional	7	0			0	1	1	1	0	0	1	0
CS1	22	2	normal	normal	2	1	3	Physio	2	2	0	0	0		Occasional	1	Occasional	Occasional	5	0			0	1	0	1	0	0	1	0
CS1	22	1	normal	normal	2	2	3	Physio	2	2	0	1	0		Occasional	1	Occasional	Occasional	16	0			0	1	0	1	0	0	1	0
CS1	22	2	overweight	overweight	2	1	3	Physio	2	2	0	1	0		Occasional	0	Never	No	14	0			1	2	1	2	0	0	1	1
CS1	22	1	overweight	overweight	1	2	3	Physio	2	2	0	1	0		Occasional	0	Occasional	Occasional	8	0			0	2	0	2	0	0	1	1
CS1	22	2	normal	normal	2	3	3	Physio	2	2	0	1	1	15	Frequent	0	Occasional	Occasional	21	0			1	2	1	3	1	1	1	0
CS1	23	2	underweight	maigreur	1	2	3	Physio	2	2	0	1	1	4	Occasional	0	Occasional	Occasional	10	0			0	2	0	2	1	0	1	0
CS1	24	2			1	2	3	Physio	2	2	1	0	1	20	Frequent	0	Occasional	Occasional	16	0			1	2	1	3	1	1	1
CS1	24	2	overweight	overweight	1	2	3	Physio	2	2	1	0	0		Never	0	Never	No	20	0			0	2	1	2	0	0	1	1
CS1	25	1	normal	normal	1	2	3	Physio	3	3	1	1	1	20	Frequent	1	Frequent	Occasional	9	0			0	2	0	3	1	1	1	0
CS1	27	1	normal	normal	1	2	3	Physio	2	2	0	1	1	16	Frequent	0	Occasional	Occasional	16	0			1	3	1	3	1	1	1	0
CS1	23	2	normal	normal	1	2	3	Physio	3	3	0	0	0		Occasional	0	Occasional									0	0	0		0
CS1	22	2	normal	normal	2	2	4	Physio	3	3	0	0	1	6	Occasional	0	Never	No	3	1	>3	1	0	2	0	1	1	0	0	0
CS1	22	2	normal	normal	1	2	4	Physio	4	>3	0	0	0		Occasional	1	Occasional	No	7	1	>3	1	0	2	0	0	0	0	0	0
CS1	22	2	normal	normal	1	1	4	Physio	3	3	1	0	0		Occasional	1	Occasional	Occasional	20	1	1	2	0	2	1	0	0	0	0	0
CS1	22	2	normal	normal	1	1	4	Physio	3	3	0	0	1	6	Occasional	0	Never	Regular	23	1	1	2	0	2	0	1	1	0	0	0
CS1	22	2	overweight	overweight	1	2	4	Physio	3	3	0	0	0		Occasional	0	Occasional	No	8	1	1	1	0	1	0	1	0	0	0	1
CS1	22	2	normal	normal	1	2	4	Physio	3	3	0	1	1	6	Occasional	0	Occasional	Occasional	23	1	1	2	0	2	0	1	1	0	0	0
CS1	22	2	normal	normal	2	2	4	Physio	4	>3	0	0	1	3	Occasional	0	Occasional	Occasional	15	1	1	2	0	2	0	1	1	0	0	0
CS1	22	1	normal	normal	1	1	4	Physio	3	3	1	0	0		Frequent	0	Occasional	No	7	1	1	2	0	1	0	1	0	1	0	0
CS1	23	1	obesity	overweight	1	3	4	Physio	3	3	0	0	0		Occasional	1	Occasional	Occasional	17	1	2	3	0	2	1	1	0	0	0	1
CS1	23	2	normal	normal	1	2	4	Physio	3	3	1	0	0		Occasional	0	Occasional	No	12	1	1	2	0	2	0	0	0	0	0	0
CS1	23	1	normal	normal	1	2	4	Physio	3	3	1	0	0		Occasional	1	Occasional	No	12	1	3	3	0	1	1	0	0	0	0	0
CS1	23	2			2	2	4	Physio	4	>3	0	1	0		Occasional	1	Occasional	No	12	1	>3	1	0	2	1	0	0	0	0
CS1	23	2	obesity	overweight	2	1	4	Physio	3	3	0	1	0		Occasional	0	Occasional	No	21	1	2	2	1	2	1	1	0	0	0	1
CS1	23	2	normal	normal	2	1	4	Physio	3	3	0	0	1	8	Occasional	0	Occasional	Occasional	14	1	1	2	0	2	1	1	1	0	0	0
CS1	23	1	normal	normal	2	2	4	Physio	3	3	1	0	1	10	Occasional	1	Frequent	Regular	0	1	2	2	0	2	0	2	1	1	0	0
CS1	24	1	normal	normal	2	1	4	Physio	4	>3	0	1	0		Frequent	1	Occasional	No	29	1	>3	2	0	2	1	1	0	1	0	0
CS1	25	2	normal	normal	1	2	4	Physio	3	3	0	0	0		Occasional	0	Occasional	Occasional	6	1	1	2	0	2	0	0	0	0	0	0
CS1	21	2	overweight	overweight	2	2	4	Physio	3	3	0	0	0		Occasional	0	Never	No	21	0			0	2	1	2	0	0	1	1
CS1	22	2	normal	normal	1	1	4	Physio	3	3	0	0	0		Occasional	0	Never	No	13	0			0	2	0	1	0	0	1	0
CS1	22	2	normal	normal	2	2	4	Physio	4	>3	0	1	0		Occasional	1	Occasional	No	24	0			1	2	0	1	0	0	1	0
CS1	22	2	normal	normal	1	2	4	Physio	3	3	1	1	1	12	Occasional	0	Occasional	Occasional	21	0			0	2	0	2	1	0	1	0
CS1	23	2	normal	normal	1	1	4	Physio	3	3	0	1	0		Occasional	0	Never	No	10	0			0	2	0	1	0	0	1	0
CS1	23	1	normal	normal	1	2	4	Physio	3	3	1	0	0		Occasional	1	Occasional	Occasional	7	0			0	2	1	1	0	0	1	0
CS1	24	1	normal	normal	2	2	4	Physio	3	3	0	0	0		Occasional	0	Occasional	No	9	0			0	2	0	1	0	0	1	0
CS2	19	1	normal	normal	2	2	4	Physio	1	1	0	0	0		Occasional	0	Occasional	No	12	1	1	3	0	2	0	0	0	0	0	0
CS2	19	2	normal	normal	1	2	4	Physio	1	1	0	0	0		Occasional	0	Occasional	No	15	1	1	3	0	2	0	0	0	0	0	0
CS2	19	2	normal	normal	2	2	4	Physio	1	1	1	0	0		Occasional	0	Occasional	No	15	1	1	2	0	2	0	0	0	0	0	0
CS2	19	2	normal	normal	2	2	4	Physio	1	1	0	0	0		Occasional	0	Occasional	Occasional	19	1	>3	2	0	1	0	0	0	0	0	0
CS2	19	2	normal	normal	1	2	4	Physio	1	1	0	0	0		Frequent	1	Frequent	No	10	1	2	2	0	1	0	1	0	1	0	0
CS2	20	2	underweight	maigreur	2	1	4	Physio	1	1	0	0	0		Occasional	0	Never	No	10	1	2	2	0	1	0	0	0	0	0	0
CS2	20	2	underweight	maigreur	2	2	4	Physio	1	1	0	1	0		Occasional	0	Occasional	No	19	1	3	3	0	3	1	0	0	0	0	0
CS2	20	1	normal	normal	2	2	4	Physio	1	1	0	0	0		Occasional	0	Occasional	No	0	1	2	1	0	2	1	0	0	0	0	0
CS2	20	2	normal	normal	2	2	4	Physio	2	2	0	0	0		Occasional	0	Occasional	No	17	1	2	2	1	3	0	0	0	0	0	0
CS2	20	1	normal	normal	2	1	4	Physio	1	1	0	0	0		Occasional	0	Occasional	No	14	1	3	3	0	2	0	0	0	0	0	0
CS2	20	2			1	2	4	Physio	1	1	0	0	0		Occasional	0	Occasional	No	13	1	1	3	0	2	1	0	0	0	0
CS2	20	1	normal	normal	1	1	4	Physio	1	1	0	0	0		Occasional	0	Occasional	Occasional	7	1	>3	3	1	3	0	0	0	0	0	0
CS2	20	2	normal	normal	2	2	4	Physio	1	1	1	0	0		Occasional	1	Occasional	No	19	1	3	2	0	2	0	0	0	0	0	0
CS2	20	2	underweight	maigreur		3	4	Physio	1	1	1	0	0		Occasional	1	Occasional	Occasional	9	1	1	2	0	1	0	0	0	0	0	0
CS2	20	2	normal	normal	1	3	4	Physio	2	2	0	1	1	12	Occasional	0	Occasional	Occasional	21	1	3	2	0	2	0	1	1	0	0	0
CS2	20	2	normal	normal	1	2	4	Physio	1	1	0	0	0		Occasional	1	Frequent	No	23	1	2	3	1	2	0	1	0	1	0	0
CS2	20	1	normal	normal	1	2	4	Physio	1	1	0	0	0		Occasional	1	Frequent	No	10	1	2	2	0	2	0	1	0	1	0	0
CS2	20	1	normal	normal	1	2	4	Physio	2	2	0	0	1	5	Occasional	1	Occasional	No	17	1	3	2	1	2	0	1	1	0	0	0
CS2	20	1	normal	normal	1	1	4	Physio	1	1	0	0	0		Frequent	0	Frequent	No	14	1	>3	2	0	2	0	1	0	1	0	0
CS2	20	2	normal	normal	2	2	4	Physio	1	1	0	0	0		Frequent	0	Occasional	No	26	1	2	2	0	2	0	1	0	1	0	0
CS2	20	1	obesity	overweight	2	1	4	Physio	2	2	1	1	0		Frequent	0	Occasional	No	17	1	>3	3	1	2	0	2	0	1	0	1
CS2	20	2	underweight	maigreur	1	1	4	Physio	1	1	0	0	1	1	Frequent	0	Occasional	Occasional	27	1	1	2	1	2	1	2	1	1	0	0
CS2	20	1	overweight	overweight	1	2	4	Physio	1	1	0	0	0		Frequent	1	Frequent	No	11	1	1	2	1	1	0	2	0	1	0	1
CS2	20	2	normal	normal	2	3	4	Physio	2	2	0	1	1	3	Frequent	1	Frequent	No	21	1	1	2	1	1	0	2	1	1	0	0
CS2	20	1	normal	normal	1	2	4	Physio	1	1	0	0	1	8	Frequent	1	Frequent	Regular	25	1	>3	3	0	2	0	2	1	1	0	0
CS2	21	1	normal	normal	1	2	4	Physio	2	2	0	0	0		Frequent	1	Frequent	No	9	1	1	2	0	1	0	1	0	1	0	0
CS2	21	2	normal	normal	1	2	4	Physio	1	1	1	0	0		Occasional	0	Never	No	18	1	2	2	1	2	1	0	0	0	0	0
CS2	21	2	normal	normal	2	1	4	Physio	2	2	0	0	0		Occasional	0	Never	No	22	1	3	2	0	2	0	0	0	0	0	0
CS2	21	1	normal	normal	1	1	4	Physio	1	1	0	0	0		Occasional	0	Never	No	9	1	>3	2	0	2	0	0	0	0	0	0
CS2	21	1	normal	normal	1	1	4	Physio	3	3	0	0	0		Occasional	0	Occasional	No	13	1	2	3	0	2	0	0	0	0	0	0
CS2	21	2	normal	normal	2	1	4	Physio	2	2	0	0	0		Occasional	0	Occasional	No	18	1	3	2	1	2	0	0	0	0	0	0
CS2	21	2	normal	normal	2	1	4	Physio	2	2	0	0	0		Occasional	0	Occasional	No	23	1	3	2	1	2	1	0	0	0	0	0
CS2	21	2	normal	normal	1	2	4	Physio	3	3	0	0	0		Occasional	0	Occasional	Occasional	18	1	2	3	0	2	0	0	0	0	0	0
CS2	21	2	underweight	maigreur	1	2	4	Physio	1	1	0	0	0		Occasional	1	Occasional	No	18	1	1	3	0	2	0	0	0	0	0	0
CS2	21	2	normal	normal	2	2	4	Physio	2	2	0	1	0		Occasional	1	Occasional	No	25	1	1	2	1	2	0	0	0	0	0	0
CS2	21	2	normal	normal	2	2	4	Physio	1	1	0	0	0		Occasional	1	Occasional	No	14	1	1	2	0	2	0	0	0	0	0	0
CS2	21	1	normal	normal	1	1	4	Physio	3	3	0	0	0		Occasional	1	Occasional	No	17	1	2	2	1	2	0	0	0	0	0	0
CS2	21	1	normal	normal	2	2	4	Physio	3	3	0	0	0		Occasional	1	Occasional	No	29	1	>3	2	0	2	0	0	0	0	0	0
CS2	21	2	normal	normal	2	2	4	Physio	1	1	0	0	0		Occasional	1	Occasional	No	16	1	>3	2	0	1	0	0	0	0	0	0
CS2	21	2	normal	normal	2	2	4	Physio	2	2	0	0	0		Occasional	1	Occasional	Occasional	16	1	>3	2	1	2	0	0	0	0	0	0
CS2	21	1	normal	normal	2	1	4	Physio	2	2	0	0	0		Occasional		Occasional	No	7	1	>3	3	0	2	1	0	0	0	0	0
CS2	21	2	normal	normal	1	2	4	Physio	2	2	0	0	1	10	Occasional	0	Never	No	18	1	>3	2	1	2	0	1	1	0	0	0
CS2	21	2	overweight	overweight	1	1	4	Physio	2	2	0	0	0		Occasional	0	Occasional	No	16	1	3	3	1	3	0	1	0	0	0	1
CS2	21	2	normal	normal	2	1	4	Physio	2	2	1	0	1	5	Occasional	0	Occasional	No	21	1	3	2	1	2	1	1	1	0	0	0
CS2	21	2	normal	normal	1	3	4	Physio	1	1	0	0	0		Occasional	1	Frequent	Occasional	23	1	1	2	0	2	0	1	0	1	0	0
CS2	21	1	overweight	overweight	2	1	4	Physio	2	2	0	1	0		Occasional	1	Occasional	No	11	1	1	3	1	2	0	1	0	0	0	1
CS2	21	2	normal	normal	2	2	4	Physio	3	3	0	1	1	10	Occasional	1	Occasional	No	15	1	3	3		2	0	1	1	0	0	0
CS2	21	2	normal	normal	2	2	4	Physio	2	2	0	0	0		Frequent	0	Occasional	Occasional	9	1	>3	3	0	2	1	1	0	1	0	0
CS2	21	1	normal	normal	1	2	4	Physio	1	1	0	0	0		Frequent	1	Frequent	No	12	1	1	2	0	2	0	1	0	1	0	0
CS2	21	1	normal	normal	1	2	4	Physio	2	2	0	0	0		Frequent	1	Frequent	Occasional	16	1	3	2	0	2	0	1	0	1	0	0
CS2	21	2	normal	normal	2	2	4	Physio	2	2	0	0	1	1	Occasional	1	Frequent	No	17	1	1	1	0	2	0	2	1	1	0	0
CS2	21	2	underweight	maigreur	1	2	4	Physio	2	2	0	0	1	6	Frequent	0	Occasional	Occasional	30	1	1	2	0	3	0	2	1	1	0	0
CS2	21	2	normal	normal	2	2	4	Physio	1	1	0	1	1	3	Frequent	0	Occasional	Occasional	15	1	2	1	0	2	1	2	1	1	0	0
CS2	21	1	normal	normal	1	2	4	Physio	2	2	0	0	1	2	Frequent	0	Occasional	Occasional	13	1	>3	2	0	2	0	2	1	1	0	0
CS2	21	1	overweight	overweight	2	1	4	Physio	2	2	0	0	1	3	Occasional	1	Frequent	Occasional	16	1	3	2	0	2	1	3	1	1	0	1
CS2	21	2	overweight	overweight	1	2	4	Physio	1	1	0	0	1	6	Frequent	1	Frequent	Occasional	21	1	1	2	1	1	0	3	1	1	0	1
CS2	21	2	normal	normal	1	1	4	Physio	3	3	0	1	0		Never	0	Never	No	13	1	2	3	0	2	0	0	0	0	0	0
CS2	21	2	normal	normal	1	3	4	Physio	2	2	1	0	0		Never	0	Never	No	24	1	2	3	0	2	0	0	0	0	0	0
CS2	21	2	obesity	overweight	2	2	4	Physio	3	3	0	0	0		Never	0	Never	No	18	1	2	2	1	2	1	1	0	0	0	1
CS2	22	1	normal	normal		1	4	Physio	3	3	0	0	0		Occasional	0	Occasional	Occasional	18	1	>3	3	0	2	0	0	0	0	0	0
CS2	22	2	normal	normal	1	1	4	Physio	2	2	0	1	0		Occasional	0	Never	No	12	1	1	2	0	1	0	0	0	0	0	0
CS2	22	2	underweight	maigreur	1	1	4	Physio	2	2	0	0	0		Occasional	0	Occasional	No	5	1	3	3	0	2	0	0	0	0	0	0
CS2	22	2	normal	normal	2	2	4	Physio	2	2	1	0	0		Occasional	0	Occasional	No	11	1	1	2	1	3	0	0	0	0	0	0
CS2	22	1	normal	normal	2	2	4	Physio	3	3	0	0	0		Occasional	0	Occasional	No	27	1	2	2	0	2	0	0	0	0	0	0
CS2	22	1	normal	normal	2	2	4	Physio	3	3	0	0	0		Occasional	0	Occasional	No	12	1	3	2	0	2	0	0	0	0	0	0
CS2	22	2	normal	normal	2	2	4	Physio	2	2	1	1	0		Occasional	1	Occasional	No	17	1	2	3	0	1	0	0	0	0	0	0
CS2	22	2	normal	normal	1	2	4	Physio	3	3	0	0	0		Occasional	1	Occasional	No	22	1	3	1	0	2	0	0	0	0	0	0
CS2	22	1	normal	normal	2	2	4	Physio	3	3	0	0	0		Occasional		Never	Occasional	10	1	>3	2	0	2	0	0	0	0	0	0
CS2	22	1	overweight	overweight	2	2	4	Physio	2	2	1	1	0		Occasional	0	Occasional	No	7	1	>3	2	0	2	0	1	0	0	0	1
CS2	22	2	normal	normal	1	2	4	Physio	2	2			0		Occasional	1	Frequent	No	21	1	3	2	0	2	0	1	0	1	0	0
CS2	22	1	overweight	overweight	2	1	4	Physio	1	1	0	0	0		Occasional	1	Occasional	Occasional	20	1	3	3	1	2	0	1	0	0	0	1
CS2	22	2	normal	normal	2	2	4	Physio	2	2	1	0	1	5	Occasional	1	Occasional	Occasional	6	1	2	2	0	2	1	1	1	0	0	0
CS2	22	1	normal	normal	1	3	4	Physio	2	2	0	0	0		Frequent	1	Occasional	Occasional	11	1	2	2	0	1	0	1	0	1	0	0
CS2	22	2			1	1	4	Physio	2	2	0	0	1	10	Occasional	1	Frequent	Occasional	14	1	2	1	0	2	0	2	1	1	0
CS2	22	1	normal	normal	1	2	4	Physio	1	1	1	0	1	6	Frequent	0	Frequent	Occasional	12	1	>3	3	0	1	0	2	1	1	0	0
CS2	22	1	normal	normal	2	2	4	Physio	3	3	0	0	1	6	Frequent	1	Frequent	No	9	1	1	3	0	3	0	2	1	1	0	0
CS2	22	1	normal	normal	1	2	4	Physio	3	3	0	0	1	10	Frequent	1	Frequent	Occasional	27	1	2	3	1	2	0	2	1	1	0	0
CS2	22	2	normal	normal	1	2	4	Physio	2	2	0	0	1	6	Frequent	1	Frequent	Occasional	5	1	1	2	1	2	0	2	1	1	0	0
CS2	22	1	normal	normal	1	2	4	Physio	3	3	0	0	1	15	Frequent	1	Occasional	Occasional	14	1	2	3	1	3	0	2	1	1	0	0
CS2	22	2	normal	normal	1	2	4	Physio	2	2	1	0	1		Frequent	1	Occasional	Occasional	7	1	2	2	0	2	0	2	1	1	0	0
CS2	22	1	overweight	overweight	2	2	4	Physio	2	2	0	0	1	5	Occasional	1	Frequent	Occasional	8	1	2	2	0	2	0	3	1	1	0	1
CS2	22	2	overweight	overweight	2	2	4	Physio	2	2	0	0	1	10	Frequent	1	Occasional	Occasional	22	1	1	3	0	2	0	3	1	1	0	1
CS2	22	2	normal	normal	2	2	4	Physio	3	3	0	0	0		Occasional	0	Never	No	19	1	1	2	0	2	0	0	0	0	0	0
CS2	23	2	underweight	maigreur	2	2	4	Physio	2	2	0	0	0		Occasional	0	Occasional	No	12	1	1	3	0	2	0	0	0	0	0	0
CS2	23	2	normal	normal	1	2	4	Physio	2	2	0	0	0		Occasional	0	Occasional	No	2	1	1	2	0	1	1	0	0	0	0	0
CS2	23	2	normal	normal	2	1	4	Physio	3	3	1	0	0		Occasional	0	Occasional	No	21	1	1	1	1	2	1	0	0	0	0	0
CS2	23	2	normal	normal	1	1	4	Physio	3	3	0	0	0		Occasional	0	Occasional	No	9	1	>3	3	0	2	0	0	0	0	0	0
CS2	23	2	normal	normal	2	2	4	Physio	2	2	0	0	0		Occasional	0	Occasional	No	7	1	>3	2	0	1	0	0	0	0	0	0
CS2	23	1	normal	normal	2	1	4	Physio	3	3	1	0	0		Occasional	1	Never	No	4	1	1	3	0	2	0	0	0	0	0	0
CS2	23	1	normal	normal	2	1	4	Physio	3	3	0	0	0		Occasional	1	Occasional	No	22	1	3	2	1	2	0	0	0	0	0	0
CS2	23	1	normal	normal	1	2	4	Physio	3	3	0	0	0		Occasional	1	Occasional	No	21	1	>3	3	0	2	0	0	0	0	0	0
CS2	23	2	normal	normal	2	2	4	Physio	2	2	0	0	0		Occasional	1	Occasional	No	12	1	>3	2	0	2	0	0	0	0	0	0
CS2	23	2	obesity	overweight	2	2	4	Physio	2	2	0	1	0		Occasional	0	Never	No	22	1	2	1	0	2	1	1	0	0	0	1
CS2	23	1	normal	normal	1	1	4	Physio	2	2			1	5	Occasional	1	Occasional	Occasional	11	1	2	2	0	2	1	1	1	0	0	0
CS2	23	1	normal	normal	1	1	4	Physio	2	2	0	0	1	6	Frequent	0	Occasional	No	18	1	3	3	0	2	1	2	1	1	0	0
CS2	23	1	overweight	overweight	1	1	4	Physio	2	2			0		Frequent	1	Occasional	Occasional	4	1	3	2	0	2	0	2	0	1	0	1
CS2	23	2	normal	normal	1	2	4	Physio	3	3	0	0	0		Never	0	Never	No	17	1	1	1	0	2	0	0	0	0	0	0
CS2	24	2	normal	normal	1	1	4	Physio	2	2	0	0	1	3	Frequent	1	Occasional	No	22	1	2	1	1	1	1	2	1	1	0	0
CS2	24	2	overweight	overweight	1	2	4	Physio	3	3	0	0	0		Occasional	1	Occasional	No	22	1	1	3	0	2	0	1	0	0	0	1
CS2	24	2	normal	normal	2	2	4	Physio	2	2	0	0	0		Frequent	0	Occasional	No	26	1	2	2	0	2	1	1	0	1	0	0
CS2	24	1	normal	normal	1	2	4	Physio	3	3	0	1	0		Frequent	0	Occasional	Occasional	13	1	3	2	0	2	0	1	0	1	0	0
CS2	25	1	normal	normal	2	2	4	Physio	1	1	0	0	0		Occasional	0	Occasional	No	20	1	>3	3	0	2	0	0	0	0	0	0
CS2	25	1	overweight	overweight	2	2	4	Physio	2	2	1	1	0		Occasional	1	Occasional	No	10	1	>3	2	0	2	1	1	0	0	0	1
CS2	30	1	overweight	overweight	1	2	4	Physio	2	2	0	1	1	5	Occasional	0	Occasional	Regular	8	1	2	3	0	2	0	2	1	0	0	1
CS2	38	1	overweight	overweight	2	2	4	Physio	3	3	0	0	0		Occasional	1	Occasional	No	7	1	2	2	0	2	0	1	0	0	0	1
CS2	19	1	normal	normal	2	3	4	Physio	1	1	0	0	0		Occasional	0	Never	No	6	0			0	2	0	1	0	0	1	0
CS2	20	1	normal	normal	1	2	4	Physio	1	1	0	0	0		Occasional	0	Never	No	6	0			0	2	0	1	0	0	1	0
CS2	20	1	normal	normal	2	1	4	Physio	1	1	0	1	0		Occasional	0	Occasional	No	14	0			0	2	0	1	0	0	1	0
CS2	20	2	normal	normal	1	1	4	Physio	1	1	0	0	0		Occasional	0	Occasional	Occasional	13	0			0	2	1	1	0	0	1	0
CS2	20	2	underweight	maigreur	1	2	4	Physio	1	1	0	1	0		Occasional	1	Occasional	No	18	0			1	2	0	1	0	0	1	0
CS2	20	2	normal	normal	2	2	4	Physio	1	1	0	0	0		Occasional	1	Occasional	Occasional	18	0			0	2	1	1	0	0	1	0
CS2	20	2	normal	normal	1	2	4	Physio	2	2	0	0	1	10	Frequent	1	Frequent	Occasional	10	0			1	2	0	3	1	1	1	0
CS2	20	2	overweight	overweight	1	2	4	Physio	1	1	0	0	1	5	Occasional	0	Frequent	Occasional	27	0			1	3	1	4	1	1	1	1
CS2	21	2	underweight	maigreur	2	2	4	Physio	2	2	0	0	0		Occasional	0	Never	No	14	0			0	2	0	1	0	0	1	0
CS2	21	2	underweight	maigreur	1	2	4	Physio	1	1	0	0	0		Occasional	0	Never	No	8	0			1	1	0	1	0	0	1	0
CS2	21	1	normal	normal	1	1	4	Physio	2	2	0	0	0		Occasional	0	Never	No	10	0			0	2	0	1	0	0	1	0
CS2	21	2	normal	normal	2	2	4	Physio	2	2	0	0	0		Occasional	0	Occasional	No	15	0			0	2	1	1	0	0	1	0
CS2	21	2	normal	normal	2	2	4	Physio	3	3	1	0	1	3	Occasional	0	Occasional	Occasional	11	0			1	1	0	2	1	0	1	0
CS2	21	1	overweight	overweight	1	2	4	Physio	2	2	0	1	0		Occasional	1	Occasional	No	8	0			0	2	0	2	0	0	1	1
CS2	21	2	normal	normal	1	2	4	Physio	2	2	0	0	1	10	Frequent	0	Occasional	Occasional	14	0			0	2	0	3	1	1	1	0
CS2	21	1	normal	normal	1	2	4	Physio	2	2	0	0	1	8	Frequent	1	Frequent	No	15	0			1	3	0	3	1	1	1	0
CS2	21	2	normal	normal	1	2	4	Physio	1	1	1		1	8	Frequent	1	Frequent	Occasional	24	0			1	2	0	3	1	1	1	0
CS2	21	1	normal	normal	2	2	4	Physio	2	2	0	1	1	15	Frequent	1	Frequent	Occasional	9	0			0	2	1	3	1	1	1	0
CS2	21	1	overweight	overweight	2	1	4	Physio	1	1	0	0	1	8	Frequent	1	Occasional	Regular	8	0			0	2	0	4	1	1	1	1
CS2	22	2	normal	normal	2	2	4	Physio	2	2	1	0	0		Occasional	0	Never	No	28	0			1	1	0	1	0	0	1	0
CS2	22	2	normal	normal	2	2	4	Physio	3	3	0	0	1	5	Frequent	0	Occasional	Occasional	25	0			0	3	1	3	1	1	1	0
CS2	22	1	normal	normal	2	2	4	Physio	1	1	0	0	0		Occasional	0	Occasional	No	23	0			0	1	0	1	0	0	1	0
CS2	22	2	normal	normal	1	2	4	Physio	3	3	1	0	0		Occasional	0	Occasional	Occasional	21	0			0	2	0	1	0	0	1	0
CS2	22	1	normal	normal	1	1	4	Physio	1	1	0	0	0		Occasional	1	Occasional	No	9	0			0	2	0	1	0	0	1	0
CS2	22	2	normal	normal	2	2	4	Physio	2	2	0	0	0		Occasional	1	Occasional	Occasional	18	0			1	2	0	1	0	0	1	0
CS2	22	2	overweight	overweight	1	1	4	Physio	2	2	0	0	0		Occasional	0	Never	No	15	0			1	2	0	2	0	0	1	1
CS2	22	2	underweight	maigreur	2	2	4	Physio	2	2	0	0	1		Occasional	1	Occasional	No	18	0			0	2	1	2	1	0	1	0
CS2	22	2	normal	normal	2	1	4	Physio	2	2	0	0	1	10	Occasional	1	Occasional	Occasional	19	0			1	2	1	2	1	0	1	0
CS2	22	2	normal	normal	1	1	4	Physio	1	1	0	0	1	10	Occasional	1	Occasional	Regular	11	0			1	2	0	2	1	0	1	0
CS2	22	2	normal	normal	2	2	4	Physio	3	3	0	0	0		Frequent	1	Never	No	20	0			0	1	0	2	0	1	1	0
CS2	22	2	normal	normal	2	1	4	Physio	2	2	1	0	1	10	Frequent	1	Frequent	Occasional	18	0			1	2	1	3	1	1	1	0
CS2	23	2	normal	normal	2	1	4	Physio	2	2	1	0	0		Occasional	0	Never	No	16	0			0	1	0	1	0	0	1	0
CS2	23	2	normal	normal	2	2	4	Physio	3	3	0	0	0		Occasional	0	Occasional	No	23	0			0	2	1	1	0	0	1	0
CS2	23	2	normal	normal	1	3	4	Physio	3	3	0	0	0		Occasional	1	Occasional	No	22	0			1	3	1	1	0	0	1	0
CS2	23	1	normal	normal	1	2	4	Physio	2	2	0	0	1	7	Frequent	0	Occasional	Occasional	26	0			1	3	1	3	1	1	1	0
CS2	24	2	normal	normal	2	2	4	Physio	3	3	0	0	0		Occasional	1	Occasional	Occasional	16	0			1	2	1	1	0	0	1	0
CS2	25	2	normal	normal	2	2	4	Physio	2	2	0	0	1	3	Occasional	0	Never	No	7	0			0	1	1	2	1	0	1	0
CS2	26	1	normal	normal	2	2	4	Physio	3	3	0	0	1	5	Occasional	1	Occasional	Occasional	19	0			0	1	0	2	1	0	1	0
CS2	39	2	normal	normal	2	2	4	Physio	1	1	0	0	0		Occasional	0	Never	No	19	0			0	2	0	1	0	0	1	0
CS2	20	2	normal	normal	1	2	4	Physio	2	2	1	1	0		Occasional	0	Never	No	14						0	0	0	0		0
CS1	17	2	normal	normal	1	1	5	Physio	1	1	0	0	0		Occasional	0	Never	Occasional	14	1	1	3	1	2	0	0	0	0	0	0
CS1	17	2	normal	normal	2	1	5	Physio	1	1	1	0	0		Occasional	0	Occasional	No	10	1	1	2	0	2	0	0	0	0	0	0
CS1	18	2	underweight	maigreur	1	2	5	Physio	1	1	1	0	0		Occasional	0	Never	No	17	1	1	2	1	2	0	0	0	0	0	0
CS1	18	2	normal	normal	2	1	5	Physio	1	1	0	0	0		Occasional	0	Never	No	12	1	1	2	0	2	1	0	0	0	0	0
CS1	18	1	normal	normal	1	1	5	Physio	1	1	0	0	0		Occasional	0	Never	No	14	1	1	2	0	2	0	0	0	0	0	0
CS1	18	2	normal	normal	1	1	5	Physio	1	1	0	1	0		Occasional	0	Occasional	Occasional	15	1	2	2	1	2	0	0	0	0	0	0
CS1	18	2	normal	normal	2	1	5	Physio	1	1	1	0	1	7	Occasional	0	Occasional	No	25	1	3	3	1	2	1	1	1	0	0	0
CS1	18	2	normal	normal	1	1	5	Physio	1	1	0	1	0		Never	0	Never	No	9	1	2	2	0	2	1	0	0	0	0	0
CS1	19	1	normal	normal	1	1	5	Physio	1	1	0	0	0		Occasional	0	Never	No	16	1	2	2	0	2	1	0	0	0	0	0
CS1	19	2	normal	normal	1	1	5	Physio	1	1	1	0	0		Occasional	0	Never	No	22	1	3	3	0	3	0	0	0	0	0	0
CS1	19	2			1	2	5	Physio	1	1	0	0	0		Occasional	0	Never	No	16	1	1	2	1	2	1	0	0	0	0
CS1	19	2	underweight	maigreur	1	2	5	Physio	1	1	0	1	0		Occasional	0	Occasional	No	15	1	1	2	0	2	1	0	0	0	0	0
CS1	19	2	normal	normal	1	1	5	Physio	1	1	0	1	0		Occasional	0	Occasional	No	9	1	1	3	0	2	0	0	0	0	0	0
CS1	19	1	normal	normal	1	3	5	Physio	1	1	0	0	0		Occasional	0	Occasional	No	19	1	3	2	0	2	1	0	0	0	0	0
CS1	19	1	normal	normal	1	1	5	Physio	1	1	0	1	0		Occasional	0	Occasional	Occasional	20	1	3	3	0	2	0	0	0	0	0	0
CS1	19	2	underweight	maigreur	1	1	5	Physio	1	1	1	0	1	3	Occasional	0	Occasional	No	13	1	1	3	1	1	0	1	1	0	0	0
CS1	19	1	normal	normal	1	2	5	Physio	1	1	0	1	0		Frequent	0	Occasional	Regular	4	1	2	3	0	2	1	1	0	1	0	0
CS1	19	1	normal	normal	1	3	5	Physio	1	1	0	0	0		Never	0	Never	No	16	1	3	3	0	1	1	0	0	0	0	0
CS1	20	2	normal	normal	1	3	5	Physio	3	3	0	0	0		Occasional	0	Occasional	Occasional	24	1	2	3	0	2	0	0	0	0	0	0
CS1	20	1	normal	normal	1	1	5	Physio	3	3	1	0	0		Occasional	1	Occasional	Occasional	13	1	3	3	0	1	0	0	0	0	0	0
CS1	20	2	underweight	maigreur	1	2	5	Physio	1	1	0	1	1	10	Occasional	0	Never	No	22	1	1	2	0	2	1	1	1	0	0	0
CS1	20	1	normal	normal	2	1	5	Physio	1	1	0	0	0		Frequent	1	Occasional	No	13	1	>3	3	0	2	0	1	0	1	0	0
CS1	20	1	normal	normal	1	1	5	Physio	1	1	0	1	0		Never	0	Never	No		1	1	3	1	2	0	0	0	0	0	0
CS1	21	2	normal	normal	1	1	5	Physio	1	1	0	0	0		Occasional	0	Never	No	11	1	2	2	0	2	0	0	0	0	0	0
CS1	21	2	normal	normal	2	2	5	Physio	3	3	0	1	0		Occasional	0	Never	No	14	1	>3	2	1	2	1	0	0	0	0	0
CS1	21	2	normal	normal	2	2	5	Physio	3	3	0	0	0		Occasional	0	Occasional	No	21	1	1	2	0	2	0	0	0	0	0	0
CS1	21	1	normal	normal	1	2	5	Physio	1	1	0	1	0		Occasional	0	Occasional	Occasional	9	1	3	3	0	1	0	0	0	0	0	0
CS1	21	1	normal	normal	1	1	5	Physio	1	1	0	0	1	5	Occasional	0	Occasional	Occasional	3	1	>3	3	0	1	0	1	1	0	0	0
CS1	22	2	normal	normal	1	1	5	Physio	3	3	1	0	1	5	Occasional	0	Never	No	17	1	2	2	0	2	0	1	1	0	0	0
CS1	22	1	normal	normal	1	1	5	Physio	1	1	0	0	0		Never	0	Never	No	15	1	2	3	0	2	0	0	0	0	0	0
CS1	23	1	normal	normal	1	2	5	Physio	3	3	0	0	0		Occasional	0	Occasional	No	13	1	2	2	0	2	0	0	0	0	0	0
CS1	25	2	normal	normal	2	2	5	Physio	1	1	0	0	0		Occasional	0	Occasional	No	9	1	1	1	0	1	0	0	0	0	0	0
CS1	25	2	overweight	overweight	2	2	5	Physio	1	1	1	0	0		Never	0	Never	No	23	1	1	3	1	1	0	1	0	0	0	1
CS1	26	2	normal	normal	2	2	5	Physio	1	1	1	0	0		Occasional	0	Never	No	24	1	2	3	0	2	1	0	0	0	0	0
CS1	33	2	normal	normal	1	2	5	Physio	3	3	0	0	0		Occasional	0	Never	No	14	1	>3	3	0	2	1	0	0	0	0	0
CS1	18	2	underweight	maigreur	1	2	5	Physio	1	1	0	0	0		Occasional	0	Never	No	22	0			0	2	0	1	0	0	1	0
CS1	18	2	normal	normal	1	3	5	Physio	1	1	0	1	0		Occasional	0	Never	No	19	0			1	2	0	1	0	0	1	0
CS1	18	2	normal	normal	2	1	5	Physio	1	1	0	0	0		Occasional	0	Never	No	21	0			0	2	0	1	0	0	1	0
CS1	18	2	underweight	maigreur	1	3	5	Physio	1	1	0	0	0		Occasional	0	Occasional	No	6	0			0	2	0	1	0	0	1	0
CS1	18	2	normal	normal	1	2	5	Physio	1	1	0	0	0		Occasional	0	Occasional	No	16	0			0	2	0	1	0	0	1	0
CS1	18	1	normal	normal	2	1	5	Physio	1	1	0	0	0		Occasional	1	Occasional	No	4	0			0	2	0	1	0	0	1	0
CS1	18	2	normal	normal	1	2	5	Physio	1	1	0	1	0		Occasional	1	Occasional	No	27	0			0	3	1	1	0	0	1	0
CS1	18	2	normal	normal	1	1	5	Physio	1	1	0	1	0		Never	0	Never	No	18	0			0	2	0	1	0	0	1	0
CS1	18	2	normal	normal	1	1	5	Physio	1	1	0	1	0		Never	0	Never	No	20	0			1	2	1	1	0	0	1	0
CS1	18	2	normal	normal	1	1	5	Physio	1	1	0	1	0		Never	0	Never	No	10	0			1		0	1	0	0	1	0
CS1	18	2	normal	normal	1	1	5	Physio	1	1	0	1	0		Never	0	Never	No	5	0			0	2	1	1	0	0	1	0
CS1	18	2	normal	normal	2	2	5	Physio	1	1	0	0	0		Never	0	Never	Occasional	19	0			0	2	0	1	0	0	1	0
CS1	18	2	overweight	overweight	1	2	5	Physio	1	1	0	0	0		Never	0	Never	No	10	0			1	2	1	2	0	0	1	1
CS1	19	2	underweight	maigreur	1	2	5	Physio	1	1	0	0	0		Occasional	0	Never	No	14	0			0	2	0	1	0	0	1	0
CS1	19	2	underweight	maigreur	1	2	5	Physio	1	1	0	0	0		Occasional	0	Never	No	15	0			1	2	1	1	0	0	1	0
CS1	19	2	normal	normal	1	2	5	Physio	1	1	0	1	0		Occasional	0	Never	No	19	0			0	2	1	1	0	0	1	0
CS1	19	2	overweight	overweight	1	3	5	Physio	1	1	0	1	0		Occasional	0	Occasional	No	12	0			0	3	0	2	0	0	1	1
CS1	19	2	overweight	overweight	1	3	5	Physio	1	1	1	1	0		Occasional	1	Occasional	No	20	0			1	2	0	2	0	0	1	1
CS1	19	2	normal	normal	1	1	5	Physio	1	1	0	1	1	7	Frequent	0	Occasional	Occasional	20	0			1	2	1	3	1	1	1	0
CS1	20	2	underweight	maigreur	2	3	5	Physio	1	1	0	1	0		Occasional	0	Never	No	12	0			0	2	0	1	0	0	1	0
CS1	20	2	normal	normal	1	1	5	Physio	3	3	1	0	0		Occasional	0	Never	No	17	0			0	1	1	1	0	0	1	0
CS1	20	2	normal	normal	1	1	5	Physio	1	1	0	1	0		Occasional	0	Occasional	Occasional	14	0			0	2	0	1	0	0	1	0
CS1	20	2	overweight	overweight	2	2	5	Physio	1	1	0	1	0		Occasional	0	Never	No	20	0			1	2	1	2	0	0	1	1
CS1	20	2	overweight	overweight	1	1	5	Physio	1	1	0	0	0		Occasional	0	Never	No	14	0			0	2	0	2	0	0	1	1
CS1	20	2	normal	normal	1	2	5	Physio	1	1	1	0	1	10	Occasional	1	Occasional	No	17	0			0		0	2	1	0	1	0
CS1	20	1	normal	normal	1	2	5	Physio	1	1	0	0	1	15	Occasional	1	Occasional	Occasional	16	0			0	2	0	2	1	0	1	0
CS1	20	2	overweight	overweight	1	1	5	Physio	1	1	0	1	1	7	Occasional	0	Occasional	No	11	0			0	2	0	3	1	0	1	1
CS1	20	1	overweight	overweight	2	1	5	Physio	1	1	0	1	1	20	Occasional	0	Occasional	Occasional	12	0			0	2	0	3	1	0	1	1
CS1	20	2	normal	normal	1	1	5	Physio	1	1	1	0	0		Never	0	Never	No	11	0			0	2	0	1	0	0	1	0
CS1	21	2	normal	normal	2	2	5	Physio	3	3	0	0	0		Occasional	0	Never	No	29	0			0	2	1	1	0	0	1	0
CS1	21	2	normal	normal	2	1	5	Physio	3	3	0	0	0		Occasional	0	Occasional	No	11	0			0	2	1	1	0	0	1	0
CS1	21	2	normal	normal	2	2	5	Physio	1	1	0	1	1	10	Occasional	0	Occasional	Occasional	22	0			0	1	1	2	1	0	1	0
CS1	21	2	normal	normal	1	2	5	Physio	1	1	0	0	1	20	Occasional	1	Occasional	Occasional	29	0			1	3	0	2	1	0	1	0
CS1	21	2	underweight	maigreur	2	2	5	Physio	3	3	0	1	0		Never	0	Never	No	33	0			1	2	1	1	0	0	1	0
CS1	21	2	normal	normal	2	1	5	Physio	3	3	0	1	0		Never	0	Never	No	15	0			0	2	0	1	0	0	1	0
CS1	21	2	normal	normal	1	3	5	Physio	1	1	0	1	0		Never	0	Never	No	22	0			1	2	0	1	0	0	1	0
CS1	22	2	normal	normal	1	1	5	Physio	1	1	0	0	0		Occasional	0	Never	No	23	0			1	2	1	1	0	0	1	0
CS1	22	2	normal	normal	2	2	5	Physio	3	3	0	0	0		Occasional	0	Never	No	18	0			0	2	0	1	0	0	1	0
CS1	22	2	overweight	overweight	2	2	5	Physio	3	3	1	0	1	10	Occasional	0	Never	No	28	0			0	2	0	3	1	0	1	1
CS1	22	2	overweight	overweight	1	2	5	Physio	1	1	1	0	1	5	Occasional	1	Occasional	Occasional	19	0			1	2	1	3	1	0	1	1
CS1	22	2	normal	normal	1	1	5	Physio	3	3	0	0	0		Never	0	Never	No		0			0	2	1	1	0	0	1	0
CS1	23	2	normal	normal	1	1	5	Physio	3	3	0	1	0		Occasional	0	Never	No	15	0			0	2	0	1	0	0	1	0
CS1	23	2	normal	normal	1	1	5	Physio	3	3	1	0	1	5	Occasional	0	Occasional	No	20	0			0	2	1	2	1	0	1	0
CS1	24	2	normal	normal	2	2	5	Physio	3	3	1	0	0		Occasional	0	Occasional	No	16	0			0	2	0	1	0	0	1	0
CS1	28	1	normal	normal	2	2	5	Physio	1	1	1	0	1	10	Occasional	0	Occasional	No	18	0			0	2	0	2	1	0	1	0
CS1	19	1	overweight	overweight	1	1	5	Physio	1	1	0	0	0		Occasional	0	Never		7							1	0	0		1
CS1	21	2	normal	normal	2	2	5	Physio	3	3	0	1	1	3	Occasional	0	Never	Occasional	16							1	1	0		0
CS1	21	2	normal	normal	1		5	Physio	3	3	1	0	0		Occasional	0	Never	No	12							0	0	0		0
CS1	22	2	normal	normal	2	1	5	Physio	3	3	0	0	0		Occasional	0	Never	No								0	0	0		0
CS2	18	2	normal	normal	1	1	5	nurse	1	1	1	0	0		Occasional	0	Never	No	17	1	>3	3	0	2	1	0	0	0	0	0
CS2	18	2	normal	normal	1	1	5	nurse	1	1	0	0	0		Occasional	0	Occasional	No	9	1	>3	1	1	2	1	0	0	0	0	0
CS2	18	2	underweight	maigreur	1	2	5	nurse	1	1	0	0	0		Occasional	1	Occasional	No	16	1	1	2	1	2	1	0	0	0	0	0
CS2	18	2	normal	normal	1	1	5	nurse	1	1	0	1	1	6	Occasional	1	Occasional	No	15	1	1	1	0	2	0	1	1	0	0	0
CS2	18	2	underweight	maigreur	2	1	5	nurse	1	1	1	0	1	10	Occasional	1	Occasional	Occasional	21	1	1	2	1	2	1	1	1	0	0	0
CS2	18	1	normal	normal	2	2	5	nurse	1	1	0	0	1	10	Occasional	1	Occasional	Occasional	10	1	>3	3	0	2	0	1	1	0	0	0
CS2	18	1	normal	normal	1	1	5	nurse	1	1	0	0	0		Frequent	0	Occasional	No	1	1	2	2	0	1	0	1	0	1	0	0
CS2	18	2	normal	normal	2	2	5	nurse	1	1	0	0	0		Never	0	Never	No	27	1	1	2	1	2	1	0	0	0	0	0
CS2	18	2	normal	normal	1	1	5	nurse	1	1	0	1	0		Never	0	Never	No	17	1	3	3	0	2	0	0	0	0	0	0
CS2	19	2	normal	normal	2	1	5	nurse	1	1	1	0	0		Occasional	0	Never	No	4	1	2	2	1	1	0	0	0	0	0	0
CS2	19	2	normal	normal	1	1	5	nurse	1	1	0	0	0		Occasional	0	Never	No	18	1	3	3	0	2	0	0	0	0	0	0
CS2	19	2	underweight	maigreur	2	1	5	nurse	1	1	0	0	0		Occasional	0	Occasional	No	18	1	1	3	0	2	0	0	0	0	0	0
CS2	19	2	underweight	maigreur	1	2	5	nurse	1	1	0	0	0		Occasional	0	Occasional	No	22	1	1	3	0	2	0	0	0	0	0	0
CS2	19	2	normal	normal	2	3	5	nurse	1	1	0	0	0		Occasional	0	Occasional	No	21	1	1	3	1	2	0	0	0	0	0	0
CS2	19	2	normal	normal	2	1	5	nurse	1	1	0	1	0		Occasional	0	Occasional	No	22	1	3	2	0	2	0	0	0	0	0	0
CS2	19	1	normal	normal	1	1	5	nurse	1	1	0	0	0		Occasional	0	Occasional	Occasional	27	1	1	2	0	2	1	0	0	0	0	0
CS2	19	2	normal	normal	1	2	5	nurse	1	1	0	0	0		Occasional	0	Occasional	Occasional	8	1	1	1	1	2	0	0	0	0	0	0
CS2	19	2	normal	normal	1	1	5	nurse	1	1	0	0	0		Occasional	0	Occasional	Occasional	15	1	3	3	0	2	0	0	0	0	0	0
CS2	19	1	normal	normal	2	1	5	nurse	1	1	0	0	0		Occasional	0	Occasional	Occasional	16	1	3	2	0	2	0	0	0	0	0	0
CS2	19	1	normal	normal	1	2	5	nurse	1	1	0	0	0		Occasional	1	Occasional	No	12	1	2	2	1	1	0	0	0	0	0	0
CS2	19	2	overweight	overweight	2	1	5	nurse	1	1	0	1	0		Occasional	0	Never	No	12	1	3	3	0	2	0	1	0	0	0	1
CS2	19	2	overweight	overweight	1		5	nurse	1	1	0	0	0		Occasional	0	Never	Occasional	13	1	1	2	1	3	0	1	0	0	0	1
CS2	19	2	normal	normal	2	1	5	nurse	1	1	0	0	1	13	Occasional	0	Occasional	Occasional	16	1	2	3	0	1	1	1	1	0	0	0
CS2	19	1	normal	normal	1	1	5	nurse	1	1	0	1	0		Frequent	1	Occasional	No	12	1	3	3	0	2	0	1	0	1	0	0
CS2	20	1	normal	normal	1	3	5	nurse	1	1	0	0	0		Occasional	1	Occasional	No	10	1	>3	2	0	2	0	0	0	0	0	0
CS2	20	2	normal	normal	2	2	5	nurse	1	1	0	0	1	8	Frequent	0	Occasional	No	21	1	3	2	1	2	1	2	1	1	0	0
CS2	20	2	normal	normal	2	2	5	nurse	1	1	0	0	0		Occasional	0	Never	No	13	1	1	1	0	2	0	0	0	0	0	0
CS2	20	2	normal	normal	2	3	5	nurse	1	1	0	0	0		Occasional	0	Never	No	14	1	1	2	0	2	0	0	0	0	0	0
CS2	20	2	normal	normal	1	2	5	nurse	1	1	0	0	0		Occasional	0	Never	No	13	1	2	2	0	2	1	0	0	0	0	0
CS2	20	2	normal	normal	2	2	5	nurse	1	1	0	0	0		Occasional	0	Never	No	21	1	3	2	1	2	1	0	0	0	0	0
CS2	20	2	normal	normal	1	2	5	nurse	2	2	0	0	0		Occasional	0	Occasional	No	16	1	2	2	0	2	0	0	0	0	0	0
CS2	20	2	normal	normal	2	2	5	nurse	2	2	0	0	0		Occasional	0	Occasional	No	11	1	2	2	0	2	1	0	0	0	0	0
CS2	20	2	normal	normal	2	2	5	nurse	1	1	0	0	0		Occasional	0	Occasional	No	13	1	2	2	1	2	0	0	0	0	0	0
CS2	20	2	normal	normal	1	1	5	nurse	1	1	0	0	0		Occasional	0	Occasional	No	28	1	>3	3	1	2	0	0	0	0	0	0
CS2	20	2	normal	normal	1	1	5	nurse	3	3	1	0	0		Occasional	0	Occasional	Occasional	29	1	1	2	0	2	1	0	0	0	0	0
CS2	20	2	normal	normal	1	3	5	nurse	2	2	0	1	0		Occasional	0	Occasional	Occasional	9	1	1	2	0	2	0	0	0	0	0	0
CS2	20	2	underweight	maigreur	1	2	5	nurse	3	3	0	0	0		Occasional	1	Occasional	No	21	1	1	3	0	2	0	0	0	0	0	0
CS2	20	2	underweight	maigreur	1	2	5	nurse	1	1	0	0	0		Occasional	1	Occasional	No	17	1	1	3	0	2	0	0	0	0	0	0
CS2	20	2	normal	normal	1	2	5	nurse	1	1	0	0	0		Occasional	1	Occasional	No	8	1	1	3	0	2	0	0	0	0	0	0
CS2	20	2	normal	normal	1	2	5	nurse	2	2	1	0	0		Occasional	1	Occasional	No	18	1	1	2	1	2	0	0	0	0	0	0
CS2	20	2	normal	normal		2	5	nurse	1	1	0	0	0		Occasional	1	Occasional	No	1	1	>3	3	0	2	0	0	0	0	0	0
CS2	20	2	normal	normal	2	3	5	nurse	1	1	1	1	0		Occasional	1	Occasional	No	5	1	>3	3	0	2	0	0	0	0	0	0
CS2	20	2			1	3	5	nurse	3	3	1	1	0		Occasional	1	Occasional	No	1	1	1	2	0	2	0	0	0	0	0
CS2	20	2	normal	normal	2	2	5	nurse	1	1	0	0	0		Occasional	1	Occasional	Occasional	9	1	2	3	0	2	0	0	0	0	0	0
CS2	20	2	overweight	overweight	1	2	5	nurse	2	2	0	0	0		Occasional	0	Occasional	No	17	1	1	2	0	1	1	1	0	0	0	1
CS2	20	2	normal	normal	2	1	5	nurse	1	1	1	0	1	8	Occasional	1	Occasional	No	13	1	>3	1	0	2	0	1	1	0	0	0
CS2	20	2	overweight	overweight	1	2	5	nurse	2	2	0	0	0		Occasional	1	Occasional	Occasional	12	1	2	2	0	2	1	1	0	0	0	1
CS2	20	2	normal	normal	1	1	5	nurse	1	1	0	1	1	2	Occasional	1	Occasional	Occasional	13	1	1	2	0	2	0	1	1	0	0	0
CS2	20	2	normal	normal	1	2	5	nurse	1	1	0	0	1	7	Occasional	1	Occasional	Occasional	29	1	3	2	1	2	1	1	1	0	0	0
CS2	20	1			2	2	5	nurse	2	2	1	0	0		Frequent	1	Frequent	Occasional	6	1	3	2	0	1	0	1	0	1	0
CS2	20	2	underweight	maigreur	2	2	5	nurse	2	2	0	0	1	12	Occasional	1	Frequent	Occasional	26	1	2	1	1	2	0	2	1	1	0	0
CS2	20	2	normal	normal	1	1	5	nurse	2	2	1	0	1	15	Occasional	1	Frequent	Occasional	25	1	1	3	1	2	1	2	1	1	0	0
CS2	20	2	normal	normal	1	2	5	nurse	2	2	0	0	1	5	Frequent	0	Occasional	Occasional	18	1	3	2	0	3	1	2	1	1	0	0
CS2	20	1	normal	normal	1	1	5	nurse	1	1	1	0	1	6	Frequent	0	Occasional	Regular	11	1	>3	3	0	1	0	2	1	1	0	0
CS2	20	2	underweight	maigreur	2	2	5	nurse	2	2	0	1	0		Never	0	Never	No	18	1	1	2	0	1	0	0	0	0	0	0
CS2	20	2	normal	normal	1	1	5	nurse	1	1	0	1	0		Never	0	Never	No	13	1	1	2	0	1	0	0	0	0	0	0
CS2	20	2	normal	normal	2	1	5	nurse	2	2	0	0	0		Never	0	Never	No	14	1	3	3	0	2	0	0	0	0	0	0
CS2	21	2	normal	normal	2	2	5	nurse	3	3	1	0	0		Occasional	0	Never	No	19	1	1	2	1	2	0	0	0	0	0	0
CS2	21	1	normal	normal	2	2	5	nurse	2	2	0	0	0		Occasional	0	Never	No	5	1	1	2	0	2	0	0	0	0	0	0
CS2	21	2	normal	normal	1	1	5	nurse	1	1	0	1	0		Occasional	0	Occasional	No	22	1	>3	3	1	1	0	0	0	0	0	0
CS2	21	2	overweight	overweight	2	2	5	nurse	3	3	1	0	1	10	Occasional	0	Occasional	No	12	1	2	2	0	2	0	2	1	0	0	1
CS2	21	2	normal	normal	2	1	5	nurse	3	3	1	1	0		Occasional	0	Never	No	20	1	2	2	0	1	0	0	0	0	0	0
CS2	21	2	normal	normal	2	1	5	nurse	2	2	1	0	0		Occasional	0	Occasional	No	14	1	1	1	0	1	1	0	0	0	0	0
CS2	21	2	normal	normal	2	2	5	nurse	2	2	0	0	0		Occasional	0	Occasional	No	14	1	3	2	0	2	0	0	0	0	0	0
CS2	21	1	normal	normal	1	2	5	nurse	1	1	0	1	0		Occasional	0	Occasional	No	8	1	3	3	0	2	1	0	0	0	0	0
CS2	21	2	normal	normal	1	2	5	nurse	2	2	0	0	0		Occasional	0	Occasional	No	21	1	>3	3	1	3	1	0	0	0	0	0
CS2	21	2	normal	normal	1	2	5	nurse	2	2	0	0	0		Occasional	0	Occasional	Occasional	22	1	1	2	0	2	0	0	0	0	0	0
CS2	21	1	normal	normal	1	1	5	nurse	1	1	0	0	0		Occasional	1	Never	No	13	1	>3	3	0	2	0	0	0	0	0	0
CS2	21	2	normal	normal	1	2	5	nurse	3	3	1	0	0		Occasional	1	Occasional	Occasional	24	1	2	2	1	2	0	0	0	0	0	0
CS2	21	2	normal	normal	2	2	5	nurse	2	2	0	0	0		Occasional	1	Occasional	Occasional	28	1	3	2	0	2	0	0	0	0	0	0
CS2	21	2	normal	normal	1	2	5	nurse	2	2	0	0	0		Occasional	1	Occasional	Occasional	20	1	3	2	0	2	0	0	0	0	0	0
CS2	21	2	normal	normal	1	2	5	nurse	2	2	1	0	0		Occasional	1	Occasional	Occasional	21	1	3	2	1	2	0	0	0	0	0	0
CS2	21	2	underweight	maigreur	2	1	5	nurse	3	3	1	0	1	10	Occasional	0	Never	No	22	1	1	2	0	2	1	1	1	0	0	0
CS2	21	1	overweight	overweight	1	2	5	nurse	2	2	0	0	0		Occasional	0	Occasional	No	2	1	1	3	1	2	0	1	0	0	0	1
CS2	21	2	normal	normal	1	2	5	nurse	1	1	0	0	1	3	Occasional	0	Occasional	No	21	1	2	2	1	2	0	1	1	0	0	0
CS2	21	2	normal	normal	2	1	5	nurse	3	3	0	0	1	15	Occasional	0	Occasional	No	16	1	3	1	1	2	0	1	1	0	0	0
CS2	21	2	underweight	maigreur	1	1	5	nurse	3	3	0	0	1	8	Occasional	1	Occasional	No	24	1	2	1	0	2	1	1	1	0	0	0
CS2	21	2			1	2	5	nurse	2	2	0	0	1	7	Occasional	1	Occasional	Occasional	21	1	1	2	1	2	1	1	1	0	0
CS2	21	1	normal	normal	1	2	5	nurse	2	2	0	0	0		Frequent	0	Occasional	No	12	1	2	2	0	2	0	1	0	1	0	0
CS2	21	1	normal	normal	1	2	5	nurse	2	2	0	0	0		Frequent	0	Occasional	Occasional	14	1	3	2	0	2	1	1	0	1	0	0
CS2	21	2	normal	normal	1	2	5	nurse	2	2	0	0	1	10	Occasional	1	Frequent	Occasional	15	1	2	2	0	2	0	2	1	1	0	0
CS2	21	1	overweight	overweight	2	2	5	nurse	1	1	1	0	1	7	Occasional	1	Occasional	Occasional	20	1	>3	3	0	1	0	2	1	0	0	1
CS2	21	2	normal	normal	2	2	5	nurse	3	3	0	0	1	10	Frequent	1	Frequent	Occasional	18	1	1	2	1	3	0	2	1	1	0	0
CS2	21	2	normal	normal	2	2	5	nurse	2	2	0	0	1	15	Frequent	1	Occasional	Occasional	7	1	3	1	0	2	1	2	1	1	0	0
CS2	22	2	normal	normal	1	2	5	nurse	3	3	0	1	0		Occasional	0	Never	No	13	1	1	2	0	2	0	0	0	0	0	0
CS2	22	2	normal	normal	2	2	5	nurse	3	3	1	1	0		Occasional	0	Never	No	15	1	1	2	0	2	0	0	0	0	0	0
CS2	22	1	normal	normal	2	2	5	nurse	1	1	0	0	0		Occasional	0	Never	No	9	1	>3	3	1	3	0	0	0	0	0	0
CS2	22	2	underweight	maigreur	1	3	5	nurse	3	3	0	0	0		Occasional	0	Occasional	No	18	1	2	2	0	2	1	0	0	0	0	0
CS2	22	2	normal	normal	1	2	5	nurse	3	3	0	0	0		Occasional	0	Occasional	No	22	1	1	1	0	2	0	0	0	0	0	0
CS2	22	2	normal	normal	2	2	5	nurse	3	3	0	0	0		Occasional	0	Occasional	No	15	1	2	2	0	2	0	0	0	0	0	0
CS2	22	2	normal	normal	2	1	5	nurse	3	3	0	0	0		Occasional	0	Occasional	No	21	1	2	2	0	2	0	0	0	0	0	0
CS2	22	2	normal	normal	2	2	5	nurse	2	2	0	0	0		Occasional	1	Occasional	No	17	1	3	2	1	2	0	0	0	0	0	0
CS2	22	2	normal	normal	1	2	5	nurse	2	2	0	0	0		Occasional	1	Occasional	No	17	1	3	1	0	2	1	0	0	0	0	0
CS2	22	2	normal	normal	2	1	5	nurse	3	3	0	0	0		Occasional	1	Occasional	Occasional	11	1	1	3	1	2	0	0	0	0	0	0
CS2	22	2	overweight	overweight	2	2	5	nurse	3	3	1	0	0		Occasional	0	Never	No	18	1	1	2	1	2	1	1	0	0	0	1
CS2	22	2	overweight	overweight	2		5	nurse	2	2	1	1	0		Occasional	0	Never	Occasional	6	1	3	2	1	2	1	1	0	0	0	1
CS2	22	2	normal	normal	1	2	5	nurse	2	2	0	0	1	10	Occasional	0	Never	Occasional	9	1	1	3	0	2	0	1	1	0	0	0
CS2	22	1	overweight	overweight	2	2	5	nurse	3	3	1	0	0		Occasional	0	Occasional	No	18	1	>3	2	1	2	0	1	0	0	0	1
CS2	22	2	normal	normal	1	2	5	nurse	3	3	1	0	1	7	Occasional	0	Occasional	No	14	1	2	3	0	2	0	1	1	0	0	0
CS2	22	2	normal	normal	2	2	5	nurse	2	2	0	0	1	6	Occasional	0	Occasional	No	20	1	3	1	0	1	1	1	1	0	0	0
CS2	22	2	normal	normal	1	2	5	nurse	2	2	1	1	1	4	Occasional	0	Occasional	Occasional	14	1	2	2	0	2	0	1	1	0	0	0
CS2	22	2	normal	normal	1	2	5	nurse	2	2	0	0	0		Occasional	1	Frequent	Occasional	13	1	3	2	1	2	0	1	0	1	0	0
CS2	22	2	normal	normal	2	2	5	nurse	3	3	0	0	1	4	Occasional	1	Occasional	No	14	1	1	1	0	2	1	1	1	0	0	0
CS2	22	2	overweight	overweight	2	1	5	nurse	3	3	0	0	0		Occasional		Occasional	No	26	1	1	3	1	1	1	1	0	0	0	1
CS2	22	1	normal	normal	1	2	5	nurse	2	2	0	0	0		Frequent	0	Never	Occasional	11	1	>3	3	0	2	0	1	0	1	0	0
CS2	22	1	normal	normal	2	1	5	nurse	3	3	0	0	0		Frequent	1	Occasional	No	16	1	>3	3	0	2	0	1	0	1	0	0
CS2	22	2	overweight	overweight	2	1	5	nurse	3	3	1	0	1	15	Occasional	1	Occasional	No	14	1	3	2	0	2	1	2	1	0	0	1
CS2	22	2	overweight	overweight	1	2	5	nurse	2	2	1	0	1	20	Frequent	0	Occasional	Occasional	23	1	1	2	1	3	1	3	1	1	0	1
CS2	22	1	obesity	overweight	1	2	5	nurse	3	3	0	0	1	7	Frequent	1	Frequent	Occasional	6	1	1	2	0	2	0	3	1	1	0	1
CS2	22	2	overweight	overweight	1	2	5	nurse	2	2	0	0	1	2	Frequent	1	Frequent	Regular	7	1	1	3	0	2	0	3	1	1	0	1
CS2	22	1	normal	normal	1	1	5	nurse	3	3	0	0	0		Occasional	0	Occasional	No	23	1	>3	2	0	2	0	0	0	0	0	0
CS2	23	2	normal	normal	1	1	5	nurse	3	3	0	0	0		Occasional	0	Never	No	16	1	1	1	1	2	0	0	0	0	0	0
CS2	23	2	normal	normal	2	2	5	nurse	3	3	0	0	0		Occasional	0	Never	No	12	1	2	2	0	1	1	0	0	0	0	0
CS2	23	1	normal	normal	1	1	5	nurse	2	2	0	1	0		Occasional	0	Never	No	17	1	3	2	0	2	0	0	0	0	0	0
CS2	23	2	normal	normal	2	2	5	nurse	2	2	0	1	0		Occasional	0	Occasional	No	17	1	3	2	1	2	0	0	0	0	0	0
CS2	23	2	normal	normal	1	2	5	nurse	1	1	0	0	0		Occasional	0	Occasional	No	13	1	1	2	1	2	0	0	0	0	0	0
CS2	23	1	normal	normal	1	1	5	nurse	3	3	0	0	0		Occasional	0	Occasional	Occasional	15	1	1	2	0	2	1	0	0	0	0	0
CS2	23	2	normal	normal	2	1	5	nurse	1	1	0	0	0		Occasional	1	Occasional	No	6	1	1	2	0	1	0	0	0	0	0	0
CS2	23	2	underweight	maigreur	1	3	5	nurse	2	2	0	0	0		Occasional	1	Occasional	Occasional	17	1	1	2	1	2	0	0	0	0	0	0
CS2	23	2			2	2	5	nurse	3	3	1	0	0		Occasional	1	Occasional	Occasional	10	1	2	2	1	2	0	0	0	0	0
CS2	23	2	obesity	overweight	2	2	5	nurse	2	2	0	1	0		Occasional	0	Never	No	22	1	2	2	0	2	0	1	0	0	0	1
CS2	23	2	overweight	overweight	2	1	5	nurse	3	3	0	1	0		Occasional	0	Never	No	23	1	1	2	0	2	0	1	0	0	0	1
CS2	23	1	overweight	overweight	1	2	5	nurse	2	2	1	0	0		Occasional	0	Occasional	No	19	1	2	2	0	2	0	1	0	0	0	1
CS2	23	1	normal	normal	2	1	5	nurse	3	3	0	0	1	2	Occasional	0	Occasional	Regular	14	1	3	2	0	2	0	1	1	0	0	0
CS2	23	2	normal	normal	1	2	5	nurse	3	3	1	0	1	11	Occasional	1	Occasional	Regular	26	1	1	1	0	3	0	1	1	0	0	0
CS2	23	2	normal	normal	1	2	5	nurse	3	3	1	0	0		Never	0	Never	No	20	1	1	1	0	2	0	0	0	0	0	0
CS2	23	2	normal	normal	1	1	5	nurse	3	3	1	0	0		Never	0	Never	No	17	1	>3	3	1	2	1	0	0	0	0	0
CS2	24	2	normal	normal	2	2	5	nurse	3	3	0	0	0		Occasional	0	Never	No	16	1	>3	1	1	2	0	0	0	0	0	0
CS2	24	1	underweight	maigreur	2	1	5	nurse	2	2		0	0		Occasional	1	Never	Occasional	12	1	2	2	0	2	0	0	0	0	0	0
CS2	24	2	overweight	overweight	1	2	5	nurse	2	2	0	0	0		Occasional	1	Occasional	No	18	1	3	2	0	2	0	1	0	0	0	1
CS2	24	2	normal	normal	2	2	5	nurse	1	1	1	0	0		Frequent	0	Occasional	Occasional	22	1	2	2	0	2	1	1	0	1	0	0
CS2	24	2	normal	normal	1	2	5	nurse	3	3	1	0	1		Occasional	1	Frequent	No	11	1	2	3	1	2	0	2	1	1	0	0
[truncated: 606 more rows]
